# Supplementary material for: Shape familiarity modulates preference for curvature in drawings of common-use objects
Source: PeerJ journal article supplement (doi:10.7717/peerj.11772), 2021-07-06
Supplement: Supplementary_Files3-4-5.zip [file Supplementary_Files3-4-5.zip]

## Sheet: Data_Experiment1
Subject_nr	Stimulus_file	Object	Contour	Shading	Category	Liking_Ratings	Curved_Familiarity	Sharp_Familiarity	Equally_Familiarity	Familiarity_selection	Familiarity_task_lateralization	art_interest_score.c	art_knowledge_score.c	openness_score.c	unconventionality_score.c	HB_score.c	HA_score.c	I_score.c	A_score.c	Stimulus	Position
1	034a4.jpg	sponge	curved	Shaded	hand	36.8	0	0	1	2	sharp_curved	8.40816	0.571429	1.63265	-1.42857	2.69388	0.612245	3.5102	-4.87755	0344	three_four
1	010a4.jpg	clock	curved	No_Shaded	computer	57.2	1	0	0	1	sharp_curved	8.40816	0.571429	1.63265	-1.42857	2.69388	0.612245	3.5102	-4.87755	0104	frontal
1	034a6.jpg	radio	curved	Shaded	hand	68.8	0	0	1	2	sharp_curved	8.40816	0.571429	1.63265	-1.42857	2.69388	0.612245	3.5102	-4.87755	0346	frontal
1	022a4.jpg	glass/cup	curved	Shaded	hand	97.2	0	0	1	2	sharp_curved	8.40816	0.571429	1.63265	-1.42857	2.69388	0.612245	3.5102	-4.87755	0224	frontal
1	033s3.jpg	toaster	sharp	No_Shaded	hand	4.4	0	0	1	2	sharp_curved	8.40816	0.571429	1.63265	-1.42857	2.69388	0.612245	3.5102	-4.87755	0333	three_four
1	010s1.jpg	handbag	sharp	No_Shaded	computer	29.6	1	0	0	1	sharp_curved	8.40816	0.571429	1.63265	-1.42857	2.69388	0.612245	3.5102	-4.87755	0101	frontal
1	050s7.jpg	mobile phone	sharp	No_Shaded	computer	43.8	1	0	0	1	curved_sharp	8.40816	0.571429	1.63265	-1.42857	2.69388	0.612245	3.5102	-4.87755	0507	frontal
1	021s4.jpg	remote control	sharp	No_Shaded	computer	80.2	1	0	0	1	curved_sharp	8.40816	0.571429	1.63265	-1.42857	2.69388	0.612245	3.5102	-4.87755	0214	three_four
1	050a5.jpg	tvmonitor	curved	No_Shaded	computer	54	0	0	1	2	curved_sharp	8.40816	0.571429	1.63265	-1.42857	2.69388	0.612245	3.5102	-4.87755	0505	frontal
1	010a7.jpg	remote control	curved	No_Shaded	hand	44.4	0	0	1	2	sharp_curved	8.40816	0.571429	1.63265	-1.42857	2.69388	0.612245	3.5102	-4.87755	0107	three_four
1	049s1.jpg	backpack	sharp	No_Shaded	hand	95.8	1	0	0	1	curved_sharp	8.40816	0.571429	1.63265	-1.42857	2.69388	0.612245	3.5102	-4.87755	0491	three_four
1	025a4.jpg	handle	curved	No_Shaded	hand	66.2	1	0	0	1	curved_sharp	8.40816	0.571429	1.63265	-1.42857	2.69388	0.612245	3.5102	-4.87755	0254	frontal
1	027a2.jpg	electric guitar	curved	No_Shaded	computer	62.4	0	0	1	2	curved_sharp	8.40816	0.571429	1.63265	-1.42857	2.69388	0.612245	3.5102	-4.87755	0272	frontal
1	052a2.jpg	photo frame	curved	No_Shaded	computer	95.8	0	0	1	2	curved_sharp	8.40816	0.571429	1.63265	-1.42857	2.69388	0.612245	3.5102	-4.87755	0522	three_four
1	039s3.jpg	glass	sharp	Shaded	hand	46.8	1	0	0	1	sharp_curved	8.40816	0.571429	1.63265	-1.42857	2.69388	0.612245	3.5102	-4.87755	0393	frontal
1	019s4.jpg	duct tape	sharp	Shaded	computer	95.4	1	0	0	1	sharp_curved	8.40816	0.571429	1.63265	-1.42857	2.69388	0.612245	3.5102	-4.87755	0194	three_four
1	022s3.jpg	mobile phone	sharp	Shaded	hand	99.2	1	0	0	1	sharp_curved	8.40816	0.571429	1.63265	-1.42857	2.69388	0.612245	3.5102	-4.87755	0223	three_four
1	008s1.jpg	mirror	sharp	No_Shaded	computer	93.6	0	0	1	2	curved_sharp	8.40816	0.571429	1.63265	-1.42857	2.69388	0.612245	3.5102	-4.87755	0081	three_four
1	034a1.jpg	jug	curved	Shaded	hand	60	1	0	0	1	curved_sharp	8.40816	0.571429	1.63265	-1.42857	2.69388	0.612245	3.5102	-4.87755	0341	frontal
1	016s6.jpg	watch	sharp	No_Shaded	hand	35.2	0	0	1	2	curved_sharp	8.40816	0.571429	1.63265	-1.42857	2.69388	0.612245	3.5102	-4.87755	0166	frontal
1	012a6.jpg	door	curved	No_Shaded	hand	18.8	0	1	0	3	sharp_curved	8.40816	0.571429	1.63265	-1.42857	2.69388	0.612245	3.5102	-4.87755	0126	frontal
1	019a4.jpg	duct tape	curved	Shaded	computer	100	1	0	0	1	sharp_curved	8.40816	0.571429	1.63265	-1.42857	2.69388	0.612245	3.5102	-4.87755	0194	three_four
1	021s3.jpg	toaster	sharp	No_Shaded	computer	53.2	0	1	0	3	sharp_curved	8.40816	0.571429	1.63265	-1.42857	2.69388	0.612245	3.5102	-4.87755	0213	three_four
1	017s1.jpg	lighter	sharp	Shaded	hand	83.6	1	0	0	1	sharp_curved	8.40816	0.571429	1.63265	-1.42857	2.69388	0.612245	3.5102	-4.87755	0171	three_four
1	019a5.jpg	tap	curved	Shaded	computer	79.4	1	0	0	1	sharp_curved	8.40816	0.571429	1.63265	-1.42857	2.69388	0.612245	3.5102	-4.87755	0195	three_four
1	010a3.jpg	glasses	curved	No_Shaded	hand	84.8	1	0	0	1	sharp_curved	8.40816	0.571429	1.63265	-1.42857	2.69388	0.612245	3.5102	-4.87755	0103	frontal
1	049a1.jpg	backpack	curved	No_Shaded	hand	100	1	0	0	1	curved_sharp	8.40816	0.571429	1.63265	-1.42857	2.69388	0.612245	3.5102	-4.87755	0491	three_four
1	040s2.jpg	scissors	sharp	Shaded	hand	79.4	1	0	0	1	sharp_curved	8.40816	0.571429	1.63265	-1.42857	2.69388	0.612245	3.5102	-4.87755	0402	three_four
1	017a1.jpg	lighter	curved	Shaded	hand	99	1	0	0	1	sharp_curved	8.40816	0.571429	1.63265	-1.42857	2.69388	0.612245	3.5102	-4.87755	0171	three_four
1	034a3.jpg	handle	curved	Shaded	hand	54.8	0	1	0	3	curved_sharp	8.40816	0.571429	1.63265	-1.42857	2.69388	0.612245	3.5102	-4.87755	0343	frontal
1	021a3.jpg	toaster	curved	No_Shaded	computer	89.8	0	1	0	3	sharp_curved	8.40816	0.571429	1.63265	-1.42857	2.69388	0.612245	3.5102	-4.87755	0213	three_four
1	049s4.jpg	lamp	sharp	No_Shaded	hand	95.4	0	1	0	3	curved_sharp	8.40816	0.571429	1.63265	-1.42857	2.69388	0.612245	3.5102	-4.87755	0494	frontal
1	040s7.jpg	pencil sharpener	sharp	Shaded	hand	93.6	0	0	1	2	sharp_curved	8.40816	0.571429	1.63265	-1.42857	2.69388	0.612245	3.5102	-4.87755	0407	three_four
1	050a4.jpg	coffee maker	curved	No_Shaded	computer	29	0	0	1	2	sharp_curved	8.40816	0.571429	1.63265	-1.42857	2.69388	0.612245	3.5102	-4.87755	0504	frontal
1	014a5.jpg	cap	curved	No_Shaded	hand	93	1	0	0	1	sharp_curved	8.40816	0.571429	1.63265	-1.42857	2.69388	0.612245	3.5102	-4.87755	0145	three_four
1	040a2.jpg	scissors	curved	Shaded	hand	98.4	1	0	0	1	sharp_curved	8.40816	0.571429	1.63265	-1.42857	2.69388	0.612245	3.5102	-4.87755	0402	three_four
1	040a6.jpg	chair	curved	Shaded	hand	52.8	1	0	0	1	curved_sharp	8.40816	0.571429	1.63265	-1.42857	2.69388	0.612245	3.5102	-4.87755	0406	three_four
1	002s5.jpg	umbrella	sharp	No_Shaded	hand	21.8	1	0	0	1	sharp_curved	8.40816	0.571429	1.63265	-1.42857	2.69388	0.612245	3.5102	-4.87755	0025	frontal
1	025s5.jpg	glasses	sharp	No_Shaded	hand	15.2	1	0	0	1	sharp_curved	8.40816	0.571429	1.63265	-1.42857	2.69388	0.612245	3.5102	-4.87755	0255	three_four
1	050s5.jpg	tvmonitor	sharp	No_Shaded	computer	14	0	0	1	2	curved_sharp	8.40816	0.571429	1.63265	-1.42857	2.69388	0.612245	3.5102	-4.87755	0505	frontal
1	001a1.jpg	hat	curved	No_Shaded	computer	96.8	1	0	0	1	sharp_curved	8.40816	0.571429	1.63265	-1.42857	2.69388	0.612245	3.5102	-4.87755	0011	three_four
1	001s3.jpg	pen	sharp	No_Shaded	computer	95	0	0	1	2	curved_sharp	8.40816	0.571429	1.63265	-1.42857	2.69388	0.612245	3.5102	-4.87755	0013	three_four
1	033s6.jpg	teapot	sharp	No_Shaded	hand	5.2	1	0	0	1	curved_sharp	8.40816	0.571429	1.63265	-1.42857	2.69388	0.612245	3.5102	-4.87755	0336	frontal
1	034s3.jpg	handle	sharp	Shaded	hand	12.8	0	1	0	3	curved_sharp	8.40816	0.571429	1.63265	-1.42857	2.69388	0.612245	3.5102	-4.87755	0343	frontal
1	025a5.jpg	glasses	curved	No_Shaded	hand	95.6	1	0	0	1	sharp_curved	8.40816	0.571429	1.63265	-1.42857	2.69388	0.612245	3.5102	-4.87755	0255	three_four
1	034s1.jpg	jug	sharp	Shaded	hand	15	1	0	0	1	curved_sharp	8.40816	0.571429	1.63265	-1.42857	2.69388	0.612245	3.5102	-4.87755	0341	frontal
1	010s4.jpg	clock	sharp	No_Shaded	computer	27	1	0	0	1	sharp_curved	8.40816	0.571429	1.63265	-1.42857	2.69388	0.612245	3.5102	-4.87755	0104	frontal
1	016s4.jpg	lightbulb	sharp	No_Shaded	hand	43.4	1	0	0	1	sharp_curved	8.40816	0.571429	1.63265	-1.42857	2.69388	0.612245	3.5102	-4.87755	0164	frontal
1	001a3.jpg	pen	curved	No_Shaded	computer	94.4	0	0	1	2	curved_sharp	8.40816	0.571429	1.63265	-1.42857	2.69388	0.612245	3.5102	-4.87755	0013	three_four
1	017s5.jpg	headphones	sharp	No_Shaded	hand	41.2	1	0	0	1	sharp_curved	8.40816	0.571429	1.63265	-1.42857	2.69388	0.612245	3.5102	-4.87755	0175	frontal
1	050s4.jpg	coffee maker	sharp	No_Shaded	computer	43.4	0	0	1	2	sharp_curved	8.40816	0.571429	1.63265	-1.42857	2.69388	0.612245	3.5102	-4.87755	0504	frontal
1	040a7.jpg	pencil sharpener	curved	Shaded	hand	87.6	0	0	1	2	sharp_curved	8.40816	0.571429	1.63265	-1.42857	2.69388	0.612245	3.5102	-4.87755	0407	three_four
1	033a3.jpg	toaster	curved	No_Shaded	hand	6.6	0	0	1	2	sharp_curved	8.40816	0.571429	1.63265	-1.42857	2.69388	0.612245	3.5102	-4.87755	0333	three_four
1	034s6.jpg	radio	sharp	Shaded	hand	77.4	0	0	1	2	sharp_curved	8.40816	0.571429	1.63265	-1.42857	2.69388	0.612245	3.5102	-4.87755	0346	frontal
1	039a3.jpg	glass	curved	Shaded	hand	94	1	0	0	1	sharp_curved	8.40816	0.571429	1.63265	-1.42857	2.69388	0.612245	3.5102	-4.87755	0393	frontal
1	002s3.jpg	lamp	sharp	No_Shaded	hand	17.6	1	0	0	1	sharp_curved	8.40816	0.571429	1.63265	-1.42857	2.69388	0.612245	3.5102	-4.87755	0023	three_four
1	021a4.jpg	remote control	curved	No_Shaded	computer	92.2	1	0	0	1	curved_sharp	8.40816	0.571429	1.63265	-1.42857	2.69388	0.612245	3.5102	-4.87755	0214	three_four
1	008a1.jpg	mirror	curved	No_Shaded	computer	95.2	0	0	1	2	curved_sharp	8.40816	0.571429	1.63265	-1.42857	2.69388	0.612245	3.5102	-4.87755	0081	three_four
1	010a6.jpg	mirror	curved	No_Shaded	computer	5.4	0	0	1	2	curved_sharp	8.40816	0.571429	1.63265	-1.42857	2.69388	0.612245	3.5102	-4.87755	0106	frontal
1	039s1.jpg	coffee maker	sharp	Shaded	hand	94	0	1	0	3	sharp_curved	8.40816	0.571429	1.63265	-1.42857	2.69388	0.612245	3.5102	-4.87755	0391	frontal
1	049a2.jpg	tv	curved	No_Shaded	hand	50.2	0	0	1	2	sharp_curved	8.40816	0.571429	1.63265	-1.42857	2.69388	0.612245	3.5102	-4.87755	0492	frontal
1	001s1.jpg	hat	sharp	No_Shaded	computer	64.4	1	0	0	1	sharp_curved	8.40816	0.571429	1.63265	-1.42857	2.69388	0.612245	3.5102	-4.87755	0011	three_four
1	025a6.jpg	comb	curved	No_Shaded	hand	65.2	0	1	0	3	sharp_curved	8.40816	0.571429	1.63265	-1.42857	2.69388	0.612245	3.5102	-4.87755	0256	frontal
1	017a5.jpg	headphones	curved	No_Shaded	hand	100	1	0	0	1	sharp_curved	8.40816	0.571429	1.63265	-1.42857	2.69388	0.612245	3.5102	-4.87755	0175	frontal
1	052s2.jpg	photo frame	sharp	No_Shaded	computer	88.2	0	0	1	2	curved_sharp	8.40816	0.571429	1.63265	-1.42857	2.69388	0.612245	3.5102	-4.87755	0522	three_four
1	040a5.jpg	watch	curved	Shaded	hand	96.8	1	0	0	1	curved_sharp	8.40816	0.571429	1.63265	-1.42857	2.69388	0.612245	3.5102	-4.87755	0405	three_four
1	010s6.jpg	mirror	sharp	No_Shaded	computer	26.8	0	0	1	2	curved_sharp	8.40816	0.571429	1.63265	-1.42857	2.69388	0.612245	3.5102	-4.87755	0106	frontal
1	010s7.jpg	remote control	sharp	No_Shaded	hand	29.8	0	0	1	2	sharp_curved	8.40816	0.571429	1.63265	-1.42857	2.69388	0.612245	3.5102	-4.87755	0107	three_four
1	002a3.jpg	lamp	curved	No_Shaded	hand	57	1	0	0	1	sharp_curved	8.40816	0.571429	1.63265	-1.42857	2.69388	0.612245	3.5102	-4.87755	0023	three_four
1	010s3.jpg	glasses	sharp	No_Shaded	hand	17	1	0	0	1	sharp_curved	8.40816	0.571429	1.63265	-1.42857	2.69388	0.612245	3.5102	-4.87755	0103	frontal
1	016a6.jpg	watch	curved	No_Shaded	hand	37.6	0	0	1	2	curved_sharp	8.40816	0.571429	1.63265	-1.42857	2.69388	0.612245	3.5102	-4.87755	0166	frontal
1	012s6.jpg	door	sharp	No_Shaded	hand	30.8	0	1	0	3	sharp_curved	8.40816	0.571429	1.63265	-1.42857	2.69388	0.612245	3.5102	-4.87755	0126	frontal
1	027s2.jpg	electric guitar	sharp	No_Shaded	computer	83.6	0	0	1	2	curved_sharp	8.40816	0.571429	1.63265	-1.42857	2.69388	0.612245	3.5102	-4.87755	0272	frontal
1	050a7.jpg	mobile phone	curved	No_Shaded	computer	65.8	1	0	0	1	curved_sharp	8.40816	0.571429	1.63265	-1.42857	2.69388	0.612245	3.5102	-4.87755	0507	frontal
1	033a6.jpg	teapot	curved	No_Shaded	hand	10.6	1	0	0	1	curved_sharp	8.40816	0.571429	1.63265	-1.42857	2.69388	0.612245	3.5102	-4.87755	0336	frontal
1	039a1.jpg	coffee maker	curved	Shaded	hand	91.2	0	1	0	3	sharp_curved	8.40816	0.571429	1.63265	-1.42857	2.69388	0.612245	3.5102	-4.87755	0391	frontal
1	034s4.jpg	sponge	sharp	Shaded	hand	71.4	0	0	1	2	sharp_curved	8.40816	0.571429	1.63265	-1.42857	2.69388	0.612245	3.5102	-4.87755	0344	three_four
1	022s4.jpg	glass/cup	sharp	Shaded	hand	99.6	0	0	1	2	sharp_curved	8.40816	0.571429	1.63265	-1.42857	2.69388	0.612245	3.5102	-4.87755	0224	frontal
1	022a3.jpg	mobile phone	curved	Shaded	hand	99.6	1	0	0	1	sharp_curved	8.40816	0.571429	1.63265	-1.42857	2.69388	0.612245	3.5102	-4.87755	0223	three_four
1	014s5.jpg	cap	sharp	No_Shaded	hand	96	1	0	0	1	sharp_curved	8.40816	0.571429	1.63265	-1.42857	2.69388	0.612245	3.5102	-4.87755	0145	three_four
1	040s6.jpg	chair	sharp	Shaded	hand	41.4	1	0	0	1	curved_sharp	8.40816	0.571429	1.63265	-1.42857	2.69388	0.612245	3.5102	-4.87755	0406	three_four
1	049a4.jpg	lamp	curved	No_Shaded	hand	93	0	1	0	3	curved_sharp	8.40816	0.571429	1.63265	-1.42857	2.69388	0.612245	3.5102	-4.87755	0494	frontal
1	040s5.jpg	watch	sharp	Shaded	hand	97.6	1	0	0	1	curved_sharp	8.40816	0.571429	1.63265	-1.42857	2.69388	0.612245	3.5102	-4.87755	0405	three_four
1	049s2.jpg	tv	sharp	No_Shaded	hand	53.2	0	0	1	2	sharp_curved	8.40816	0.571429	1.63265	-1.42857	2.69388	0.612245	3.5102	-4.87755	0492	frontal
1	019s5.jpg	tap	sharp	Shaded	computer	89.2	1	0	0	1	sharp_curved	8.40816	0.571429	1.63265	-1.42857	2.69388	0.612245	3.5102	-4.87755	0195	three_four
1	025s6.jpg	comb	sharp	No_Shaded	hand	17.8	0	1	0	3	sharp_curved	8.40816	0.571429	1.63265	-1.42857	2.69388	0.612245	3.5102	-4.87755	0256	frontal
1	002a5.jpg	umbrella	curved	No_Shaded	hand	17.8	1	0	0	1	sharp_curved	8.40816	0.571429	1.63265	-1.42857	2.69388	0.612245	3.5102	-4.87755	0025	frontal
1	025s4.jpg	handle	sharp	No_Shaded	hand	42.6	1	0	0	1	curved_sharp	8.40816	0.571429	1.63265	-1.42857	2.69388	0.612245	3.5102	-4.87755	0254	frontal
1	010a1.jpg	handbag	curved	No_Shaded	computer	61.6	1	0	0	1	sharp_curved	8.40816	0.571429	1.63265	-1.42857	2.69388	0.612245	3.5102	-4.87755	0101	frontal
1	016a4.jpg	lightbulb	curved	No_Shaded	hand	52.6	1	0	0	1	sharp_curved	8.40816	0.571429	1.63265	-1.42857	2.69388	0.612245	3.5102	-4.87755	0164	frontal
10	010a7.jpg	remote control	curved	No_Shaded	hand	38.8	0	0	1	2	curved_sharp	5.40816	-0.428571	-5.36735	-1.42857	0.693878	0.612245	-4.4898	1.12245	0107	three_four
10	034a6.jpg	radio	curved	Shaded	hand	33.6	0	0	1	2	curved_sharp	5.40816	-0.428571	-5.36735	-1.42857	0.693878	0.612245	-4.4898	1.12245	0346	frontal
10	010a3.jpg	glasses	curved	No_Shaded	hand	49	0	0	1	2	sharp_curved	5.40816	-0.428571	-5.36735	-1.42857	0.693878	0.612245	-4.4898	1.12245	0103	frontal
10	016a6.jpg	watch	curved	No_Shaded	hand	38.8	0	0	1	2	sharp_curved	5.40816	-0.428571	-5.36735	-1.42857	0.693878	0.612245	-4.4898	1.12245	0166	frontal
10	052s2.jpg	photo frame	sharp	No_Shaded	computer	80.4	0	1	0	3	sharp_curved	5.40816	-0.428571	-5.36735	-1.42857	0.693878	0.612245	-4.4898	1.12245	0522	three_four
10	010a1.jpg	handbag	curved	No_Shaded	computer	40	0	0	1	2	curved_sharp	5.40816	-0.428571	-5.36735	-1.42857	0.693878	0.612245	-4.4898	1.12245	0101	frontal
10	034s3.jpg	handle	sharp	Shaded	hand	4.8	0	0	1	2	curved_sharp	5.40816	-0.428571	-5.36735	-1.42857	0.693878	0.612245	-4.4898	1.12245	0343	frontal
10	040a6.jpg	chair	curved	Shaded	hand	61.8	1	0	0	1	curved_sharp	5.40816	-0.428571	-5.36735	-1.42857	0.693878	0.612245	-4.4898	1.12245	0406	three_four
10	017s1.jpg	lighter	sharp	Shaded	hand	6.2	1	0	0	1	sharp_curved	5.40816	-0.428571	-5.36735	-1.42857	0.693878	0.612245	-4.4898	1.12245	0171	three_four
10	002s3.jpg	lamp	sharp	No_Shaded	hand	33.2	1	0	0	1	curved_sharp	5.40816	-0.428571	-5.36735	-1.42857	0.693878	0.612245	-4.4898	1.12245	0023	three_four
10	034s6.jpg	radio	sharp	Shaded	hand	80.2	0	0	1	2	curved_sharp	5.40816	-0.428571	-5.36735	-1.42857	0.693878	0.612245	-4.4898	1.12245	0346	frontal
10	001s3.jpg	pen	sharp	No_Shaded	computer	67.8	1	0	0	1	curved_sharp	5.40816	-0.428571	-5.36735	-1.42857	0.693878	0.612245	-4.4898	1.12245	0013	three_four
10	017a5.jpg	headphones	curved	No_Shaded	hand	12.4	0	0	1	2	curved_sharp	5.40816	-0.428571	-5.36735	-1.42857	0.693878	0.612245	-4.4898	1.12245	0175	frontal
10	022a3.jpg	mobile phone	curved	Shaded	hand	48	0	0	1	2	sharp_curved	5.40816	-0.428571	-5.36735	-1.42857	0.693878	0.612245	-4.4898	1.12245	0223	three_four
10	014a5.jpg	cap	curved	No_Shaded	hand	33	1	0	0	1	curved_sharp	5.40816	-0.428571	-5.36735	-1.42857	0.693878	0.612245	-4.4898	1.12245	0145	three_four
10	050s7.jpg	mobile phone	sharp	No_Shaded	computer	60.2	1	0	0	1	sharp_curved	5.40816	-0.428571	-5.36735	-1.42857	0.693878	0.612245	-4.4898	1.12245	0507	frontal
10	040a7.jpg	pencil sharpener	curved	Shaded	hand	18.6	0	1	0	3	curved_sharp	5.40816	-0.428571	-5.36735	-1.42857	0.693878	0.612245	-4.4898	1.12245	0407	three_four
10	017a1.jpg	lighter	curved	Shaded	hand	85.6	1	0	0	1	sharp_curved	5.40816	-0.428571	-5.36735	-1.42857	0.693878	0.612245	-4.4898	1.12245	0171	three_four
10	010s6.jpg	mirror	sharp	No_Shaded	computer	34.4	1	0	0	1	sharp_curved	5.40816	-0.428571	-5.36735	-1.42857	0.693878	0.612245	-4.4898	1.12245	0106	frontal
10	050a5.jpg	tvmonitor	curved	No_Shaded	computer	29.4	1	0	0	1	sharp_curved	5.40816	-0.428571	-5.36735	-1.42857	0.693878	0.612245	-4.4898	1.12245	0505	frontal
10	025a6.jpg	comb	curved	No_Shaded	hand	23.4	0	1	0	3	curved_sharp	5.40816	-0.428571	-5.36735	-1.42857	0.693878	0.612245	-4.4898	1.12245	0256	frontal
10	016a4.jpg	lightbulb	curved	No_Shaded	hand	43.6	1	0	0	1	sharp_curved	5.40816	-0.428571	-5.36735	-1.42857	0.693878	0.612245	-4.4898	1.12245	0164	frontal
10	040s2.jpg	scissors	sharp	Shaded	hand	33	0	0	1	2	sharp_curved	5.40816	-0.428571	-5.36735	-1.42857	0.693878	0.612245	-4.4898	1.12245	0402	three_four
10	039a1.jpg	coffee maker	curved	Shaded	hand	8.2	0	0	1	2	sharp_curved	5.40816	-0.428571	-5.36735	-1.42857	0.693878	0.612245	-4.4898	1.12245	0391	frontal
10	021a4.jpg	remote control	curved	No_Shaded	computer	51.2	0	1	0	3	curved_sharp	5.40816	-0.428571	-5.36735	-1.42857	0.693878	0.612245	-4.4898	1.12245	0214	three_four
10	019s5.jpg	tap	sharp	Shaded	computer	90.6	1	0	0	1	sharp_curved	5.40816	-0.428571	-5.36735	-1.42857	0.693878	0.612245	-4.4898	1.12245	0195	three_four
10	012s6.jpg	door	sharp	No_Shaded	hand	8.6	1	0	0	1	curved_sharp	5.40816	-0.428571	-5.36735	-1.42857	0.693878	0.612245	-4.4898	1.12245	0126	frontal
10	040s6.jpg	chair	sharp	Shaded	hand	14.2	1	0	0	1	curved_sharp	5.40816	-0.428571	-5.36735	-1.42857	0.693878	0.612245	-4.4898	1.12245	0406	three_four
10	034a4.jpg	sponge	curved	Shaded	hand	26.6	1	0	0	1	curved_sharp	5.40816	-0.428571	-5.36735	-1.42857	0.693878	0.612245	-4.4898	1.12245	0344	three_four
10	002a5.jpg	umbrella	curved	No_Shaded	hand	25	0	0	1	2	curved_sharp	5.40816	-0.428571	-5.36735	-1.42857	0.693878	0.612245	-4.4898	1.12245	0025	frontal
10	033a6.jpg	teapot	curved	No_Shaded	hand	16.4	1	0	0	1	curved_sharp	5.40816	-0.428571	-5.36735	-1.42857	0.693878	0.612245	-4.4898	1.12245	0336	frontal
10	025s6.jpg	comb	sharp	No_Shaded	hand	8.2	0	1	0	3	curved_sharp	5.40816	-0.428571	-5.36735	-1.42857	0.693878	0.612245	-4.4898	1.12245	0256	frontal
10	040a2.jpg	scissors	curved	Shaded	hand	47.8	0	0	1	2	sharp_curved	5.40816	-0.428571	-5.36735	-1.42857	0.693878	0.612245	-4.4898	1.12245	0402	three_four
10	049a4.jpg	lamp	curved	No_Shaded	hand	68	0	1	0	3	sharp_curved	5.40816	-0.428571	-5.36735	-1.42857	0.693878	0.612245	-4.4898	1.12245	0494	frontal
10	019s4.jpg	duct tape	sharp	Shaded	computer	49.8	0	0	1	2	curved_sharp	5.40816	-0.428571	-5.36735	-1.42857	0.693878	0.612245	-4.4898	1.12245	0194	three_four
10	025a5.jpg	glasses	curved	No_Shaded	hand	70.6	0	1	0	3	sharp_curved	5.40816	-0.428571	-5.36735	-1.42857	0.693878	0.612245	-4.4898	1.12245	0255	three_four
10	040s5.jpg	watch	sharp	Shaded	hand	63.2	0	1	0	3	sharp_curved	5.40816	-0.428571	-5.36735	-1.42857	0.693878	0.612245	-4.4898	1.12245	0405	three_four
10	002a3.jpg	lamp	curved	No_Shaded	hand	41.6	1	0	0	1	curved_sharp	5.40816	-0.428571	-5.36735	-1.42857	0.693878	0.612245	-4.4898	1.12245	0023	three_four
10	010s1.jpg	handbag	sharp	No_Shaded	computer	33.8	0	0	1	2	curved_sharp	5.40816	-0.428571	-5.36735	-1.42857	0.693878	0.612245	-4.4898	1.12245	0101	frontal
10	052a2.jpg	photo frame	curved	No_Shaded	computer	70.6	0	1	0	3	sharp_curved	5.40816	-0.428571	-5.36735	-1.42857	0.693878	0.612245	-4.4898	1.12245	0522	three_four
10	010s3.jpg	glasses	sharp	No_Shaded	hand	41.6	0	0	1	2	sharp_curved	5.40816	-0.428571	-5.36735	-1.42857	0.693878	0.612245	-4.4898	1.12245	0103	frontal
10	010s4.jpg	clock	sharp	No_Shaded	computer	55.8	0	0	1	2	sharp_curved	5.40816	-0.428571	-5.36735	-1.42857	0.693878	0.612245	-4.4898	1.12245	0104	frontal
10	019a4.jpg	duct tape	curved	Shaded	computer	62.8	0	0	1	2	curved_sharp	5.40816	-0.428571	-5.36735	-1.42857	0.693878	0.612245	-4.4898	1.12245	0194	three_four
10	010a6.jpg	mirror	curved	No_Shaded	computer	27.8	1	0	0	1	sharp_curved	5.40816	-0.428571	-5.36735	-1.42857	0.693878	0.612245	-4.4898	1.12245	0106	frontal
10	040s7.jpg	pencil sharpener	sharp	Shaded	hand	31.4	0	1	0	3	curved_sharp	5.40816	-0.428571	-5.36735	-1.42857	0.693878	0.612245	-4.4898	1.12245	0407	three_four
10	017s5.jpg	headphones	sharp	No_Shaded	hand	29.8	0	0	1	2	curved_sharp	5.40816	-0.428571	-5.36735	-1.42857	0.693878	0.612245	-4.4898	1.12245	0175	frontal
10	025s4.jpg	handle	sharp	No_Shaded	hand	3	1	0	0	1	sharp_curved	5.40816	-0.428571	-5.36735	-1.42857	0.693878	0.612245	-4.4898	1.12245	0254	frontal
10	049s2.jpg	tv	sharp	No_Shaded	hand	26.8	1	0	0	1	curved_sharp	5.40816	-0.428571	-5.36735	-1.42857	0.693878	0.612245	-4.4898	1.12245	0492	frontal
10	019a5.jpg	tap	curved	Shaded	computer	79.6	1	0	0	1	sharp_curved	5.40816	-0.428571	-5.36735	-1.42857	0.693878	0.612245	-4.4898	1.12245	0195	three_four
10	033a3.jpg	toaster	curved	No_Shaded	hand	14	1	0	0	1	sharp_curved	5.40816	-0.428571	-5.36735	-1.42857	0.693878	0.612245	-4.4898	1.12245	0333	three_four
10	050a4.jpg	coffee maker	curved	No_Shaded	computer	51.4	0	1	0	3	sharp_curved	5.40816	-0.428571	-5.36735	-1.42857	0.693878	0.612245	-4.4898	1.12245	0504	frontal
10	034s1.jpg	jug	sharp	Shaded	hand	28.6	1	0	0	1	curved_sharp	5.40816	-0.428571	-5.36735	-1.42857	0.693878	0.612245	-4.4898	1.12245	0341	frontal
10	001s1.jpg	hat	sharp	No_Shaded	computer	28.8	0	0	1	2	curved_sharp	5.40816	-0.428571	-5.36735	-1.42857	0.693878	0.612245	-4.4898	1.12245	0011	three_four
10	034s4.jpg	sponge	sharp	Shaded	hand	26.4	1	0	0	1	curved_sharp	5.40816	-0.428571	-5.36735	-1.42857	0.693878	0.612245	-4.4898	1.12245	0344	three_four
10	025a4.jpg	handle	curved	No_Shaded	hand	12.6	1	0	0	1	sharp_curved	5.40816	-0.428571	-5.36735	-1.42857	0.693878	0.612245	-4.4898	1.12245	0254	frontal
10	050s5.jpg	tvmonitor	sharp	No_Shaded	computer	32.8	1	0	0	1	sharp_curved	5.40816	-0.428571	-5.36735	-1.42857	0.693878	0.612245	-4.4898	1.12245	0505	frontal
10	016s4.jpg	lightbulb	sharp	No_Shaded	hand	11.2	1	0	0	1	sharp_curved	5.40816	-0.428571	-5.36735	-1.42857	0.693878	0.612245	-4.4898	1.12245	0164	frontal
10	021s3.jpg	toaster	sharp	No_Shaded	computer	10.2	1	0	0	1	curved_sharp	5.40816	-0.428571	-5.36735	-1.42857	0.693878	0.612245	-4.4898	1.12245	0213	three_four
10	039s3.jpg	glass	sharp	Shaded	hand	14.2	1	0	0	1	curved_sharp	5.40816	-0.428571	-5.36735	-1.42857	0.693878	0.612245	-4.4898	1.12245	0393	frontal
10	049a1.jpg	backpack	curved	No_Shaded	hand	46.4	0	0	1	2	sharp_curved	5.40816	-0.428571	-5.36735	-1.42857	0.693878	0.612245	-4.4898	1.12245	0491	three_four
10	034a3.jpg	handle	curved	Shaded	hand	8.4	0	0	1	2	curved_sharp	5.40816	-0.428571	-5.36735	-1.42857	0.693878	0.612245	-4.4898	1.12245	0343	frontal
10	012a6.jpg	door	curved	No_Shaded	hand	9.8	1	0	0	1	curved_sharp	5.40816	-0.428571	-5.36735	-1.42857	0.693878	0.612245	-4.4898	1.12245	0126	frontal
10	033s6.jpg	teapot	sharp	No_Shaded	hand	14.8	1	0	0	1	curved_sharp	5.40816	-0.428571	-5.36735	-1.42857	0.693878	0.612245	-4.4898	1.12245	0336	frontal
10	002s5.jpg	umbrella	sharp	No_Shaded	hand	21.8	0	0	1	2	curved_sharp	5.40816	-0.428571	-5.36735	-1.42857	0.693878	0.612245	-4.4898	1.12245	0025	frontal
10	039s1.jpg	coffee maker	sharp	Shaded	hand	24.6	0	0	1	2	sharp_curved	5.40816	-0.428571	-5.36735	-1.42857	0.693878	0.612245	-4.4898	1.12245	0391	frontal
10	033s3.jpg	toaster	sharp	No_Shaded	hand	21.2	1	0	0	1	sharp_curved	5.40816	-0.428571	-5.36735	-1.42857	0.693878	0.612245	-4.4898	1.12245	0333	three_four
10	008a1.jpg	mirror	curved	No_Shaded	computer	18.2	1	0	0	1	curved_sharp	5.40816	-0.428571	-5.36735	-1.42857	0.693878	0.612245	-4.4898	1.12245	0081	three_four
10	034a1.jpg	jug	curved	Shaded	hand	60.8	1	0	0	1	curved_sharp	5.40816	-0.428571	-5.36735	-1.42857	0.693878	0.612245	-4.4898	1.12245	0341	frontal
10	001a1.jpg	hat	curved	No_Shaded	computer	73.4	0	0	1	2	curved_sharp	5.40816	-0.428571	-5.36735	-1.42857	0.693878	0.612245	-4.4898	1.12245	0011	three_four
10	027s2.jpg	electric guitar	sharp	No_Shaded	computer	53.2	0	0	1	2	sharp_curved	5.40816	-0.428571	-5.36735	-1.42857	0.693878	0.612245	-4.4898	1.12245	0272	frontal
10	022s3.jpg	mobile phone	sharp	Shaded	hand	43.2	0	0	1	2	sharp_curved	5.40816	-0.428571	-5.36735	-1.42857	0.693878	0.612245	-4.4898	1.12245	0223	three_four
10	050a7.jpg	mobile phone	curved	No_Shaded	computer	56.2	1	0	0	1	sharp_curved	5.40816	-0.428571	-5.36735	-1.42857	0.693878	0.612245	-4.4898	1.12245	0507	frontal
10	049s4.jpg	lamp	sharp	No_Shaded	hand	68.2	0	1	0	3	sharp_curved	5.40816	-0.428571	-5.36735	-1.42857	0.693878	0.612245	-4.4898	1.12245	0494	frontal
10	010s7.jpg	remote control	sharp	No_Shaded	hand	50	0	0	1	2	curved_sharp	5.40816	-0.428571	-5.36735	-1.42857	0.693878	0.612245	-4.4898	1.12245	0107	three_four
10	010a4.jpg	clock	curved	No_Shaded	computer	80.2	0	0	1	2	sharp_curved	5.40816	-0.428571	-5.36735	-1.42857	0.693878	0.612245	-4.4898	1.12245	0104	frontal
10	025s5.jpg	glasses	sharp	No_Shaded	hand	67	0	1	0	3	sharp_curved	5.40816	-0.428571	-5.36735	-1.42857	0.693878	0.612245	-4.4898	1.12245	0255	three_four
10	049a2.jpg	tv	curved	No_Shaded	hand	58.4	1	0	0	1	curved_sharp	5.40816	-0.428571	-5.36735	-1.42857	0.693878	0.612245	-4.4898	1.12245	0492	frontal
10	022s4.jpg	glass/cup	sharp	Shaded	hand	89.4	0	0	1	2	curved_sharp	5.40816	-0.428571	-5.36735	-1.42857	0.693878	0.612245	-4.4898	1.12245	0224	frontal
10	027a2.jpg	electric guitar	curved	No_Shaded	computer	87.2	0	0	1	2	sharp_curved	5.40816	-0.428571	-5.36735	-1.42857	0.693878	0.612245	-4.4898	1.12245	0272	frontal
10	008s1.jpg	mirror	sharp	No_Shaded	computer	35.6	1	0	0	1	curved_sharp	5.40816	-0.428571	-5.36735	-1.42857	0.693878	0.612245	-4.4898	1.12245	0081	three_four
10	014s5.jpg	cap	sharp	No_Shaded	hand	36.4	1	0	0	1	curved_sharp	5.40816	-0.428571	-5.36735	-1.42857	0.693878	0.612245	-4.4898	1.12245	0145	three_four
10	001a3.jpg	pen	curved	No_Shaded	computer	62.8	1	0	0	1	curved_sharp	5.40816	-0.428571	-5.36735	-1.42857	0.693878	0.612245	-4.4898	1.12245	0013	three_four
10	021s4.jpg	remote control	sharp	No_Shaded	computer	40.6	0	1	0	3	curved_sharp	5.40816	-0.428571	-5.36735	-1.42857	0.693878	0.612245	-4.4898	1.12245	0214	three_four
10	040a5.jpg	watch	curved	Shaded	hand	54.6	0	1	0	3	sharp_curved	5.40816	-0.428571	-5.36735	-1.42857	0.693878	0.612245	-4.4898	1.12245	0405	three_four
10	050s4.jpg	coffee maker	sharp	No_Shaded	computer	34.2	0	1	0	3	sharp_curved	5.40816	-0.428571	-5.36735	-1.42857	0.693878	0.612245	-4.4898	1.12245	0504	frontal
10	021a3.jpg	toaster	curved	No_Shaded	computer	67.8	1	0	0	1	curved_sharp	5.40816	-0.428571	-5.36735	-1.42857	0.693878	0.612245	-4.4898	1.12245	0213	three_four
10	049s1.jpg	backpack	sharp	No_Shaded	hand	78.6	0	0	1	2	sharp_curved	5.40816	-0.428571	-5.36735	-1.42857	0.693878	0.612245	-4.4898	1.12245	0491	three_four
10	022a4.jpg	glass/cup	curved	Shaded	hand	93.8	0	0	1	2	curved_sharp	5.40816	-0.428571	-5.36735	-1.42857	0.693878	0.612245	-4.4898	1.12245	0224	frontal
10	039a3.jpg	glass	curved	Shaded	hand	83.8	1	0	0	1	curved_sharp	5.40816	-0.428571	-5.36735	-1.42857	0.693878	0.612245	-4.4898	1.12245	0393	frontal
10	016s6.jpg	watch	sharp	No_Shaded	hand	29	0	0	1	2	sharp_curved	5.40816	-0.428571	-5.36735	-1.42857	0.693878	0.612245	-4.4898	1.12245	0166	frontal
11	025s4.jpg	handle	sharp	No_Shaded	hand	42.2	1	0	0	1	sharp_curved	5.40816	0.571429	8.63265	0.571429	-0.306122	1.61224	2.5102	4.12245	0254	frontal
11	049s4.jpg	lamp	sharp	No_Shaded	hand	62.6	0	1	0	3	curved_sharp	5.40816	0.571429	8.63265	0.571429	-0.306122	1.61224	2.5102	4.12245	0494	frontal
11	010s6.jpg	mirror	sharp	No_Shaded	computer	74.6	0	1	0	3	sharp_curved	5.40816	0.571429	8.63265	0.571429	-0.306122	1.61224	2.5102	4.12245	0106	frontal
11	034s6.jpg	radio	sharp	Shaded	hand	64.2	1	0	0	1	curved_sharp	5.40816	0.571429	8.63265	0.571429	-0.306122	1.61224	2.5102	4.12245	0346	frontal
11	025a5.jpg	glasses	curved	No_Shaded	hand	59	1	0	0	1	sharp_curved	5.40816	0.571429	8.63265	0.571429	-0.306122	1.61224	2.5102	4.12245	0255	three_four
11	002a3.jpg	lamp	curved	No_Shaded	hand	67.4	1	0	0	1	sharp_curved	5.40816	0.571429	8.63265	0.571429	-0.306122	1.61224	2.5102	4.12245	0023	three_four
11	025a4.jpg	handle	curved	No_Shaded	hand	42.2	1	0	0	1	sharp_curved	5.40816	0.571429	8.63265	0.571429	-0.306122	1.61224	2.5102	4.12245	0254	frontal
11	049s2.jpg	tv	sharp	No_Shaded	hand	62.8	0	1	0	3	curved_sharp	5.40816	0.571429	8.63265	0.571429	-0.306122	1.61224	2.5102	4.12245	0492	frontal
11	034s1.jpg	jug	sharp	Shaded	hand	55	1	0	0	1	curved_sharp	5.40816	0.571429	8.63265	0.571429	-0.306122	1.61224	2.5102	4.12245	0341	frontal
11	040s5.jpg	watch	sharp	Shaded	hand	50.2	1	0	0	1	sharp_curved	5.40816	0.571429	8.63265	0.571429	-0.306122	1.61224	2.5102	4.12245	0405	three_four
11	016s4.jpg	lightbulb	sharp	No_Shaded	hand	42.4	1	0	0	1	sharp_curved	5.40816	0.571429	8.63265	0.571429	-0.306122	1.61224	2.5102	4.12245	0164	frontal
11	033a6.jpg	teapot	curved	No_Shaded	hand	43.4	1	0	0	1	curved_sharp	5.40816	0.571429	8.63265	0.571429	-0.306122	1.61224	2.5102	4.12245	0336	frontal
11	040s7.jpg	pencil sharpener	sharp	Shaded	hand	59	0	1	0	3	sharp_curved	5.40816	0.571429	8.63265	0.571429	-0.306122	1.61224	2.5102	4.12245	0407	three_four
11	052a2.jpg	photo frame	curved	No_Shaded	computer	75.6	1	0	0	1	sharp_curved	5.40816	0.571429	8.63265	0.571429	-0.306122	1.61224	2.5102	4.12245	0522	three_four
11	002a5.jpg	umbrella	curved	No_Shaded	hand	49.4	0	1	0	3	sharp_curved	5.40816	0.571429	8.63265	0.571429	-0.306122	1.61224	2.5102	4.12245	0025	frontal
11	040a5.jpg	watch	curved	Shaded	hand	71.8	1	0	0	1	sharp_curved	5.40816	0.571429	8.63265	0.571429	-0.306122	1.61224	2.5102	4.12245	0405	three_four
11	019a5.jpg	tap	curved	Shaded	computer	70.6	0	1	0	3	curved_sharp	5.40816	0.571429	8.63265	0.571429	-0.306122	1.61224	2.5102	4.12245	0195	three_four
11	014s5.jpg	cap	sharp	No_Shaded	hand	49	1	0	0	1	curved_sharp	5.40816	0.571429	8.63265	0.571429	-0.306122	1.61224	2.5102	4.12245	0145	three_four
11	039a1.jpg	coffee maker	curved	Shaded	hand	50.8	0	1	0	3	sharp_curved	5.40816	0.571429	8.63265	0.571429	-0.306122	1.61224	2.5102	4.12245	0391	frontal
11	049a2.jpg	tv	curved	No_Shaded	hand	52.2	0	1	0	3	curved_sharp	5.40816	0.571429	8.63265	0.571429	-0.306122	1.61224	2.5102	4.12245	0492	frontal
11	008a1.jpg	mirror	curved	No_Shaded	computer	61	1	0	0	1	sharp_curved	5.40816	0.571429	8.63265	0.571429	-0.306122	1.61224	2.5102	4.12245	0081	three_four
11	001s3.jpg	pen	sharp	No_Shaded	computer	73.8	1	0	0	1	sharp_curved	5.40816	0.571429	8.63265	0.571429	-0.306122	1.61224	2.5102	4.12245	0013	three_four
11	034a6.jpg	radio	curved	Shaded	hand	77.4	1	0	0	1	curved_sharp	5.40816	0.571429	8.63265	0.571429	-0.306122	1.61224	2.5102	4.12245	0346	frontal
11	021s4.jpg	remote control	sharp	No_Shaded	computer	70.8	0	1	0	3	sharp_curved	5.40816	0.571429	8.63265	0.571429	-0.306122	1.61224	2.5102	4.12245	0214	three_four
11	017s1.jpg	lighter	sharp	Shaded	hand	70.4	1	0	0	1	curved_sharp	5.40816	0.571429	8.63265	0.571429	-0.306122	1.61224	2.5102	4.12245	0171	three_four
11	008s1.jpg	mirror	sharp	No_Shaded	computer	83	1	0	0	1	sharp_curved	5.40816	0.571429	8.63265	0.571429	-0.306122	1.61224	2.5102	4.12245	0081	three_four
11	052s2.jpg	photo frame	sharp	No_Shaded	computer	98.4	1	0	0	1	sharp_curved	5.40816	0.571429	8.63265	0.571429	-0.306122	1.61224	2.5102	4.12245	0522	three_four
11	040a7.jpg	pencil sharpener	curved	Shaded	hand	64.2	0	1	0	3	sharp_curved	5.40816	0.571429	8.63265	0.571429	-0.306122	1.61224	2.5102	4.12245	0407	three_four
11	002s5.jpg	umbrella	sharp	No_Shaded	hand	76.2	0	1	0	3	sharp_curved	5.40816	0.571429	8.63265	0.571429	-0.306122	1.61224	2.5102	4.12245	0025	frontal
11	016a6.jpg	watch	curved	No_Shaded	hand	57.8	1	0	0	1	curved_sharp	5.40816	0.571429	8.63265	0.571429	-0.306122	1.61224	2.5102	4.12245	0166	frontal
11	010a1.jpg	handbag	curved	No_Shaded	computer	50.6	1	0	0	1	sharp_curved	5.40816	0.571429	8.63265	0.571429	-0.306122	1.61224	2.5102	4.12245	0101	frontal
11	050a4.jpg	coffee maker	curved	No_Shaded	computer	98.8	0	1	0	3	sharp_curved	5.40816	0.571429	8.63265	0.571429	-0.306122	1.61224	2.5102	4.12245	0504	frontal
11	017a1.jpg	lighter	curved	Shaded	hand	83	1	0	0	1	curved_sharp	5.40816	0.571429	8.63265	0.571429	-0.306122	1.61224	2.5102	4.12245	0171	three_four
11	021s3.jpg	toaster	sharp	No_Shaded	computer	79	0	1	0	3	sharp_curved	5.40816	0.571429	8.63265	0.571429	-0.306122	1.61224	2.5102	4.12245	0213	three_four
11	010a4.jpg	clock	curved	No_Shaded	computer	77	1	0	0	1	curved_sharp	5.40816	0.571429	8.63265	0.571429	-0.306122	1.61224	2.5102	4.12245	0104	frontal
11	034a1.jpg	jug	curved	Shaded	hand	94.2	1	0	0	1	curved_sharp	5.40816	0.571429	8.63265	0.571429	-0.306122	1.61224	2.5102	4.12245	0341	frontal
11	014a5.jpg	cap	curved	No_Shaded	hand	50	1	0	0	1	curved_sharp	5.40816	0.571429	8.63265	0.571429	-0.306122	1.61224	2.5102	4.12245	0145	three_four
11	022a3.jpg	mobile phone	curved	Shaded	hand	95.6	1	0	0	1	sharp_curved	5.40816	0.571429	8.63265	0.571429	-0.306122	1.61224	2.5102	4.12245	0223	three_four
11	050s5.jpg	tvmonitor	sharp	No_Shaded	computer	89.2	0	1	0	3	sharp_curved	5.40816	0.571429	8.63265	0.571429	-0.306122	1.61224	2.5102	4.12245	0505	frontal
11	016s6.jpg	watch	sharp	No_Shaded	hand	61.6	1	0	0	1	curved_sharp	5.40816	0.571429	8.63265	0.571429	-0.306122	1.61224	2.5102	4.12245	0166	frontal
11	025s6.jpg	comb	sharp	No_Shaded	hand	67.2	1	0	0	1	curved_sharp	5.40816	0.571429	8.63265	0.571429	-0.306122	1.61224	2.5102	4.12245	0256	frontal
11	040s6.jpg	chair	sharp	Shaded	hand	49.2	0	1	0	3	sharp_curved	5.40816	0.571429	8.63265	0.571429	-0.306122	1.61224	2.5102	4.12245	0406	three_four
11	049a1.jpg	backpack	curved	No_Shaded	hand	93.2	1	0	0	1	sharp_curved	5.40816	0.571429	8.63265	0.571429	-0.306122	1.61224	2.5102	4.12245	0491	three_four
11	010a6.jpg	mirror	curved	No_Shaded	computer	77.8	0	1	0	3	sharp_curved	5.40816	0.571429	8.63265	0.571429	-0.306122	1.61224	2.5102	4.12245	0106	frontal
11	039s3.jpg	glass	sharp	Shaded	hand	55.6	1	0	0	1	sharp_curved	5.40816	0.571429	8.63265	0.571429	-0.306122	1.61224	2.5102	4.12245	0393	frontal
11	001s1.jpg	hat	sharp	No_Shaded	computer	88.6	0	1	0	3	sharp_curved	5.40816	0.571429	8.63265	0.571429	-0.306122	1.61224	2.5102	4.12245	0011	three_four
11	016a4.jpg	lightbulb	curved	No_Shaded	hand	75.4	1	0	0	1	sharp_curved	5.40816	0.571429	8.63265	0.571429	-0.306122	1.61224	2.5102	4.12245	0164	frontal
11	010s4.jpg	clock	sharp	No_Shaded	computer	87.4	1	0	0	1	curved_sharp	5.40816	0.571429	8.63265	0.571429	-0.306122	1.61224	2.5102	4.12245	0104	frontal
11	017a5.jpg	headphones	curved	No_Shaded	hand	43.6	1	0	0	1	sharp_curved	5.40816	0.571429	8.63265	0.571429	-0.306122	1.61224	2.5102	4.12245	0175	frontal
11	002s3.jpg	lamp	sharp	No_Shaded	hand	52.2	1	0	0	1	sharp_curved	5.40816	0.571429	8.63265	0.571429	-0.306122	1.61224	2.5102	4.12245	0023	three_four
11	022s4.jpg	glass/cup	sharp	Shaded	hand	95.8	1	0	0	1	curved_sharp	5.40816	0.571429	8.63265	0.571429	-0.306122	1.61224	2.5102	4.12245	0224	frontal
11	025a6.jpg	comb	curved	No_Shaded	hand	69.6	1	0	0	1	curved_sharp	5.40816	0.571429	8.63265	0.571429	-0.306122	1.61224	2.5102	4.12245	0256	frontal
11	034a3.jpg	handle	curved	Shaded	hand	98	1	0	0	1	curved_sharp	5.40816	0.571429	8.63265	0.571429	-0.306122	1.61224	2.5102	4.12245	0343	frontal
11	010s3.jpg	glasses	sharp	No_Shaded	hand	82	1	0	0	1	sharp_curved	5.40816	0.571429	8.63265	0.571429	-0.306122	1.61224	2.5102	4.12245	0103	frontal
11	033s3.jpg	toaster	sharp	No_Shaded	hand	88.8	0	1	0	3	sharp_curved	5.40816	0.571429	8.63265	0.571429	-0.306122	1.61224	2.5102	4.12245	0333	three_four
11	027a2.jpg	electric guitar	curved	No_Shaded	computer	81.6	1	0	0	1	sharp_curved	5.40816	0.571429	8.63265	0.571429	-0.306122	1.61224	2.5102	4.12245	0272	frontal
11	019a4.jpg	duct tape	curved	Shaded	computer	73.6	1	0	0	1	curved_sharp	5.40816	0.571429	8.63265	0.571429	-0.306122	1.61224	2.5102	4.12245	0194	three_four
11	033s6.jpg	teapot	sharp	No_Shaded	hand	24.6	1	0	0	1	curved_sharp	5.40816	0.571429	8.63265	0.571429	-0.306122	1.61224	2.5102	4.12245	0336	frontal
11	017s5.jpg	headphones	sharp	No_Shaded	hand	59.2	1	0	0	1	sharp_curved	5.40816	0.571429	8.63265	0.571429	-0.306122	1.61224	2.5102	4.12245	0175	frontal
11	034a4.jpg	sponge	curved	Shaded	hand	3.4	1	0	0	1	curved_sharp	5.40816	0.571429	8.63265	0.571429	-0.306122	1.61224	2.5102	4.12245	0344	three_four
11	039s1.jpg	coffee maker	sharp	Shaded	hand	91.4	0	1	0	3	sharp_curved	5.40816	0.571429	8.63265	0.571429	-0.306122	1.61224	2.5102	4.12245	0391	frontal
11	034s3.jpg	handle	sharp	Shaded	hand	58.6	1	0	0	1	curved_sharp	5.40816	0.571429	8.63265	0.571429	-0.306122	1.61224	2.5102	4.12245	0343	frontal
11	019s4.jpg	duct tape	sharp	Shaded	computer	37.2	1	0	0	1	curved_sharp	5.40816	0.571429	8.63265	0.571429	-0.306122	1.61224	2.5102	4.12245	0194	three_four
11	050a5.jpg	tvmonitor	curved	No_Shaded	computer	73.2	0	1	0	3	sharp_curved	5.40816	0.571429	8.63265	0.571429	-0.306122	1.61224	2.5102	4.12245	0505	frontal
11	040s2.jpg	scissors	sharp	Shaded	hand	38	1	0	0	1	curved_sharp	5.40816	0.571429	8.63265	0.571429	-0.306122	1.61224	2.5102	4.12245	0402	three_four
11	050s4.jpg	coffee maker	sharp	No_Shaded	computer	84.6	0	1	0	3	sharp_curved	5.40816	0.571429	8.63265	0.571429	-0.306122	1.61224	2.5102	4.12245	0504	frontal
11	039a3.jpg	glass	curved	Shaded	hand	72.2	1	0	0	1	sharp_curved	5.40816	0.571429	8.63265	0.571429	-0.306122	1.61224	2.5102	4.12245	0393	frontal
11	049a4.jpg	lamp	curved	No_Shaded	hand	73.6	0	1	0	3	curved_sharp	5.40816	0.571429	8.63265	0.571429	-0.306122	1.61224	2.5102	4.12245	0494	frontal
11	034s4.jpg	sponge	sharp	Shaded	hand	8	1	0	0	1	curved_sharp	5.40816	0.571429	8.63265	0.571429	-0.306122	1.61224	2.5102	4.12245	0344	three_four
11	040a6.jpg	chair	curved	Shaded	hand	39	0	1	0	3	sharp_curved	5.40816	0.571429	8.63265	0.571429	-0.306122	1.61224	2.5102	4.12245	0406	three_four
11	021a3.jpg	toaster	curved	No_Shaded	computer	43.4	0	1	0	3	sharp_curved	5.40816	0.571429	8.63265	0.571429	-0.306122	1.61224	2.5102	4.12245	0213	three_four
11	012s6.jpg	door	sharp	No_Shaded	hand	42.4	0	1	0	3	curved_sharp	5.40816	0.571429	8.63265	0.571429	-0.306122	1.61224	2.5102	4.12245	0126	frontal
11	040a2.jpg	scissors	curved	Shaded	hand	47.6	1	0	0	1	curved_sharp	5.40816	0.571429	8.63265	0.571429	-0.306122	1.61224	2.5102	4.12245	0402	three_four
11	050a7.jpg	mobile phone	curved	No_Shaded	computer	77.2	1	0	0	1	curved_sharp	5.40816	0.571429	8.63265	0.571429	-0.306122	1.61224	2.5102	4.12245	0507	frontal
11	025s5.jpg	glasses	sharp	No_Shaded	hand	49.4	1	0	0	1	sharp_curved	5.40816	0.571429	8.63265	0.571429	-0.306122	1.61224	2.5102	4.12245	0255	three_four
11	022a4.jpg	glass/cup	curved	Shaded	hand	86.8	1	0	0	1	curved_sharp	5.40816	0.571429	8.63265	0.571429	-0.306122	1.61224	2.5102	4.12245	0224	frontal
11	021a4.jpg	remote control	curved	No_Shaded	computer	58	0	1	0	3	sharp_curved	5.40816	0.571429	8.63265	0.571429	-0.306122	1.61224	2.5102	4.12245	0214	three_four
11	022s3.jpg	mobile phone	sharp	Shaded	hand	70	1	0	0	1	sharp_curved	5.40816	0.571429	8.63265	0.571429	-0.306122	1.61224	2.5102	4.12245	0223	three_four
11	001a1.jpg	hat	curved	No_Shaded	computer	50.8	0	1	0	3	sharp_curved	5.40816	0.571429	8.63265	0.571429	-0.306122	1.61224	2.5102	4.12245	0011	three_four
11	010a3.jpg	glasses	curved	No_Shaded	hand	72.4	1	0	0	1	sharp_curved	5.40816	0.571429	8.63265	0.571429	-0.306122	1.61224	2.5102	4.12245	0103	frontal
11	010s1.jpg	handbag	sharp	No_Shaded	computer	46	1	0	0	1	sharp_curved	5.40816	0.571429	8.63265	0.571429	-0.306122	1.61224	2.5102	4.12245	0101	frontal
11	010s7.jpg	remote control	sharp	No_Shaded	hand	65.4	1	0	0	1	sharp_curved	5.40816	0.571429	8.63265	0.571429	-0.306122	1.61224	2.5102	4.12245	0107	three_four
11	049s1.jpg	backpack	sharp	No_Shaded	hand	83.8	1	0	0	1	sharp_curved	5.40816	0.571429	8.63265	0.571429	-0.306122	1.61224	2.5102	4.12245	0491	three_four
11	012a6.jpg	door	curved	No_Shaded	hand	76.4	0	1	0	3	curved_sharp	5.40816	0.571429	8.63265	0.571429	-0.306122	1.61224	2.5102	4.12245	0126	frontal
11	001a3.jpg	pen	curved	No_Shaded	computer	99.2	1	0	0	1	sharp_curved	5.40816	0.571429	8.63265	0.571429	-0.306122	1.61224	2.5102	4.12245	0013	three_four
11	027s2.jpg	electric guitar	sharp	No_Shaded	computer	86.8	1	0	0	1	sharp_curved	5.40816	0.571429	8.63265	0.571429	-0.306122	1.61224	2.5102	4.12245	0272	frontal
11	019s5.jpg	tap	sharp	Shaded	computer	75.2	0	1	0	3	curved_sharp	5.40816	0.571429	8.63265	0.571429	-0.306122	1.61224	2.5102	4.12245	0195	three_four
11	050s7.jpg	mobile phone	sharp	No_Shaded	computer	69.6	1	0	0	1	curved_sharp	5.40816	0.571429	8.63265	0.571429	-0.306122	1.61224	2.5102	4.12245	0507	frontal
11	033a3.jpg	toaster	curved	No_Shaded	hand	55.6	0	1	0	3	sharp_curved	5.40816	0.571429	8.63265	0.571429	-0.306122	1.61224	2.5102	4.12245	0333	three_four
11	010a7.jpg	remote control	curved	No_Shaded	hand	62.8	1	0	0	1	sharp_curved	5.40816	0.571429	8.63265	0.571429	-0.306122	1.61224	2.5102	4.12245	0107	three_four
12	049a2.jpg	tv	curved	No_Shaded	hand	99.8	0	0	1	2	curved_sharp	-9.59184	-1.42857	0.632653	0.571429	0.693878	2.61224	4.5102	0.122449	0492	frontal
12	040a7.jpg	pencil sharpener	curved	Shaded	hand	18.6	0	1	0	3	curved_sharp	-9.59184	-1.42857	0.632653	0.571429	0.693878	2.61224	4.5102	0.122449	0407	three_four
12	016s6.jpg	watch	sharp	No_Shaded	hand	95.2	1	0	0	1	curved_sharp	-9.59184	-1.42857	0.632653	0.571429	0.693878	2.61224	4.5102	0.122449	0166	frontal
12	040a2.jpg	scissors	curved	Shaded	hand	13.8	1	0	0	1	sharp_curved	-9.59184	-1.42857	0.632653	0.571429	0.693878	2.61224	4.5102	0.122449	0402	three_four
12	025a5.jpg	glasses	curved	No_Shaded	hand	2.8	1	0	0	1	curved_sharp	-9.59184	-1.42857	0.632653	0.571429	0.693878	2.61224	4.5102	0.122449	0255	three_four
12	008s1.jpg	mirror	sharp	No_Shaded	computer	37.2	0	1	0	3	curved_sharp	-9.59184	-1.42857	0.632653	0.571429	0.693878	2.61224	4.5102	0.122449	0081	three_four
12	034a1.jpg	jug	curved	Shaded	hand	81.4	0	1	0	3	sharp_curved	-9.59184	-1.42857	0.632653	0.571429	0.693878	2.61224	4.5102	0.122449	0341	frontal
12	022s4.jpg	glass/cup	sharp	Shaded	hand	95.4	1	0	0	1	sharp_curved	-9.59184	-1.42857	0.632653	0.571429	0.693878	2.61224	4.5102	0.122449	0224	frontal
12	010a4.jpg	clock	curved	No_Shaded	computer	92.4	1	0	0	1	curved_sharp	-9.59184	-1.42857	0.632653	0.571429	0.693878	2.61224	4.5102	0.122449	0104	frontal
12	012s6.jpg	door	sharp	No_Shaded	hand	78	1	0	0	1	sharp_curved	-9.59184	-1.42857	0.632653	0.571429	0.693878	2.61224	4.5102	0.122449	0126	frontal
12	002a3.jpg	lamp	curved	No_Shaded	hand	89.4	1	0	0	1	curved_sharp	-9.59184	-1.42857	0.632653	0.571429	0.693878	2.61224	4.5102	0.122449	0023	three_four
12	017s5.jpg	headphones	sharp	No_Shaded	hand	98.2	0	1	0	3	curved_sharp	-9.59184	-1.42857	0.632653	0.571429	0.693878	2.61224	4.5102	0.122449	0175	frontal
12	010a3.jpg	glasses	curved	No_Shaded	hand	2.6	0	0	1	2	sharp_curved	-9.59184	-1.42857	0.632653	0.571429	0.693878	2.61224	4.5102	0.122449	0103	frontal
12	034s1.jpg	jug	sharp	Shaded	hand	100	0	1	0	3	sharp_curved	-9.59184	-1.42857	0.632653	0.571429	0.693878	2.61224	4.5102	0.122449	0341	frontal
12	027s2.jpg	electric guitar	sharp	No_Shaded	computer	100	1	0	0	1	sharp_curved	-9.59184	-1.42857	0.632653	0.571429	0.693878	2.61224	4.5102	0.122449	0272	frontal
12	034s6.jpg	radio	sharp	Shaded	hand	82.2	0	1	0	3	sharp_curved	-9.59184	-1.42857	0.632653	0.571429	0.693878	2.61224	4.5102	0.122449	0346	frontal
12	049s1.jpg	backpack	sharp	No_Shaded	hand	0	0	0	1	2	curved_sharp	-9.59184	-1.42857	0.632653	0.571429	0.693878	2.61224	4.5102	0.122449	0491	three_four
12	052a2.jpg	photo frame	curved	No_Shaded	computer	41.8	0	1	0	3	curved_sharp	-9.59184	-1.42857	0.632653	0.571429	0.693878	2.61224	4.5102	0.122449	0522	three_four
12	022s3.jpg	mobile phone	sharp	Shaded	hand	99.2	1	0	0	1	curved_sharp	-9.59184	-1.42857	0.632653	0.571429	0.693878	2.61224	4.5102	0.122449	0223	three_four
12	019a4.jpg	duct tape	curved	Shaded	computer	3.4	0	1	0	3	curved_sharp	-9.59184	-1.42857	0.632653	0.571429	0.693878	2.61224	4.5102	0.122449	0194	three_four
12	010a7.jpg	remote control	curved	No_Shaded	hand	98.6	1	0	0	1	curved_sharp	-9.59184	-1.42857	0.632653	0.571429	0.693878	2.61224	4.5102	0.122449	0107	three_four
12	001s3.jpg	pen	sharp	No_Shaded	computer	96.2	1	0	0	1	sharp_curved	-9.59184	-1.42857	0.632653	0.571429	0.693878	2.61224	4.5102	0.122449	0013	three_four
12	019s5.jpg	tap	sharp	Shaded	computer	3.8	0	1	0	3	sharp_curved	-9.59184	-1.42857	0.632653	0.571429	0.693878	2.61224	4.5102	0.122449	0195	three_four
12	017a1.jpg	lighter	curved	Shaded	hand	0.4	1	0	0	1	sharp_curved	-9.59184	-1.42857	0.632653	0.571429	0.693878	2.61224	4.5102	0.122449	0171	three_four
12	010s3.jpg	glasses	sharp	No_Shaded	hand	2.4	0	0	1	2	sharp_curved	-9.59184	-1.42857	0.632653	0.571429	0.693878	2.61224	4.5102	0.122449	0103	frontal
12	010s6.jpg	mirror	sharp	No_Shaded	computer	13.2	0	1	0	3	curved_sharp	-9.59184	-1.42857	0.632653	0.571429	0.693878	2.61224	4.5102	0.122449	0106	frontal
12	050s7.jpg	mobile phone	sharp	No_Shaded	computer	98.8	1	0	0	1	sharp_curved	-9.59184	-1.42857	0.632653	0.571429	0.693878	2.61224	4.5102	0.122449	0507	frontal
12	021a4.jpg	remote control	curved	No_Shaded	computer	94.2	0	1	0	3	sharp_curved	-9.59184	-1.42857	0.632653	0.571429	0.693878	2.61224	4.5102	0.122449	0214	three_four
12	021a3.jpg	toaster	curved	No_Shaded	computer	97.2	0	1	0	3	sharp_curved	-9.59184	-1.42857	0.632653	0.571429	0.693878	2.61224	4.5102	0.122449	0213	three_four
12	050s4.jpg	coffee maker	sharp	No_Shaded	computer	50.8	0	1	0	3	sharp_curved	-9.59184	-1.42857	0.632653	0.571429	0.693878	2.61224	4.5102	0.122449	0504	frontal
12	039s3.jpg	glass	sharp	Shaded	hand	54.8	0	0	1	2	curved_sharp	-9.59184	-1.42857	0.632653	0.571429	0.693878	2.61224	4.5102	0.122449	0393	frontal
12	025a4.jpg	handle	curved	No_Shaded	hand	51.4	0	1	0	3	curved_sharp	-9.59184	-1.42857	0.632653	0.571429	0.693878	2.61224	4.5102	0.122449	0254	frontal
12	034s3.jpg	handle	sharp	Shaded	hand	1.2	0	1	0	3	curved_sharp	-9.59184	-1.42857	0.632653	0.571429	0.693878	2.61224	4.5102	0.122449	0343	frontal
12	002a5.jpg	umbrella	curved	No_Shaded	hand	95.4	1	0	0	1	curved_sharp	-9.59184	-1.42857	0.632653	0.571429	0.693878	2.61224	4.5102	0.122449	0025	frontal
12	002s3.jpg	lamp	sharp	No_Shaded	hand	88.4	1	0	0	1	curved_sharp	-9.59184	-1.42857	0.632653	0.571429	0.693878	2.61224	4.5102	0.122449	0023	three_four
12	040s2.jpg	scissors	sharp	Shaded	hand	25.6	1	0	0	1	sharp_curved	-9.59184	-1.42857	0.632653	0.571429	0.693878	2.61224	4.5102	0.122449	0402	three_four
12	021s4.jpg	remote control	sharp	No_Shaded	computer	94.2	0	1	0	3	sharp_curved	-9.59184	-1.42857	0.632653	0.571429	0.693878	2.61224	4.5102	0.122449	0214	three_four
12	021s3.jpg	toaster	sharp	No_Shaded	computer	95.4	0	1	0	3	sharp_curved	-9.59184	-1.42857	0.632653	0.571429	0.693878	2.61224	4.5102	0.122449	0213	three_four
12	010a6.jpg	mirror	curved	No_Shaded	computer	11.8	0	1	0	3	curved_sharp	-9.59184	-1.42857	0.632653	0.571429	0.693878	2.61224	4.5102	0.122449	0106	frontal
12	040s6.jpg	chair	sharp	Shaded	hand	96.2	1	0	0	1	curved_sharp	-9.59184	-1.42857	0.632653	0.571429	0.693878	2.61224	4.5102	0.122449	0406	three_four
12	050a7.jpg	mobile phone	curved	No_Shaded	computer	100	1	0	0	1	sharp_curved	-9.59184	-1.42857	0.632653	0.571429	0.693878	2.61224	4.5102	0.122449	0507	frontal
12	016a6.jpg	watch	curved	No_Shaded	hand	98.8	1	0	0	1	curved_sharp	-9.59184	-1.42857	0.632653	0.571429	0.693878	2.61224	4.5102	0.122449	0166	frontal
12	001s1.jpg	hat	sharp	No_Shaded	computer	19.2	0	1	0	3	sharp_curved	-9.59184	-1.42857	0.632653	0.571429	0.693878	2.61224	4.5102	0.122449	0011	three_four
12	010a1.jpg	handbag	curved	No_Shaded	computer	76.8	0	0	1	2	curved_sharp	-9.59184	-1.42857	0.632653	0.571429	0.693878	2.61224	4.5102	0.122449	0101	frontal
12	001a3.jpg	pen	curved	No_Shaded	computer	84.4	1	0	0	1	sharp_curved	-9.59184	-1.42857	0.632653	0.571429	0.693878	2.61224	4.5102	0.122449	0013	three_four
12	017s1.jpg	lighter	sharp	Shaded	hand	18.8	1	0	0	1	sharp_curved	-9.59184	-1.42857	0.632653	0.571429	0.693878	2.61224	4.5102	0.122449	0171	three_four
12	033a3.jpg	toaster	curved	No_Shaded	hand	93	0	1	0	3	sharp_curved	-9.59184	-1.42857	0.632653	0.571429	0.693878	2.61224	4.5102	0.122449	0333	three_four
12	040s7.jpg	pencil sharpener	sharp	Shaded	hand	86	0	1	0	3	curved_sharp	-9.59184	-1.42857	0.632653	0.571429	0.693878	2.61224	4.5102	0.122449	0407	three_four
12	010s7.jpg	remote control	sharp	No_Shaded	hand	91.8	1	0	0	1	curved_sharp	-9.59184	-1.42857	0.632653	0.571429	0.693878	2.61224	4.5102	0.122449	0107	three_four
12	002s5.jpg	umbrella	sharp	No_Shaded	hand	92.8	1	0	0	1	curved_sharp	-9.59184	-1.42857	0.632653	0.571429	0.693878	2.61224	4.5102	0.122449	0025	frontal
12	019s4.jpg	duct tape	sharp	Shaded	computer	86.4	0	1	0	3	curved_sharp	-9.59184	-1.42857	0.632653	0.571429	0.693878	2.61224	4.5102	0.122449	0194	three_four
12	022a3.jpg	mobile phone	curved	Shaded	hand	97.2	1	0	0	1	curved_sharp	-9.59184	-1.42857	0.632653	0.571429	0.693878	2.61224	4.5102	0.122449	0223	three_four
12	040a5.jpg	watch	curved	Shaded	hand	96.8	1	0	0	1	curved_sharp	-9.59184	-1.42857	0.632653	0.571429	0.693878	2.61224	4.5102	0.122449	0405	three_four
12	034a4.jpg	sponge	curved	Shaded	hand	78.4	1	0	0	1	sharp_curved	-9.59184	-1.42857	0.632653	0.571429	0.693878	2.61224	4.5102	0.122449	0344	three_four
12	010s1.jpg	handbag	sharp	No_Shaded	computer	76.2	0	0	1	2	curved_sharp	-9.59184	-1.42857	0.632653	0.571429	0.693878	2.61224	4.5102	0.122449	0101	frontal
12	001a1.jpg	hat	curved	No_Shaded	computer	9.4	0	1	0	3	sharp_curved	-9.59184	-1.42857	0.632653	0.571429	0.693878	2.61224	4.5102	0.122449	0011	three_four
12	025s6.jpg	comb	sharp	No_Shaded	hand	82.2	1	0	0	1	curved_sharp	-9.59184	-1.42857	0.632653	0.571429	0.693878	2.61224	4.5102	0.122449	0256	frontal
12	050a5.jpg	tvmonitor	curved	No_Shaded	computer	82	1	0	0	1	sharp_curved	-9.59184	-1.42857	0.632653	0.571429	0.693878	2.61224	4.5102	0.122449	0505	frontal
12	039a1.jpg	coffee maker	curved	Shaded	hand	56.2	0	1	0	3	sharp_curved	-9.59184	-1.42857	0.632653	0.571429	0.693878	2.61224	4.5102	0.122449	0391	frontal
12	014a5.jpg	cap	curved	No_Shaded	hand	19	1	0	0	1	sharp_curved	-9.59184	-1.42857	0.632653	0.571429	0.693878	2.61224	4.5102	0.122449	0145	three_four
12	033s6.jpg	teapot	sharp	No_Shaded	hand	16.6	1	0	0	1	curved_sharp	-9.59184	-1.42857	0.632653	0.571429	0.693878	2.61224	4.5102	0.122449	0336	frontal
12	033s3.jpg	toaster	sharp	No_Shaded	hand	93.4	0	1	0	3	sharp_curved	-9.59184	-1.42857	0.632653	0.571429	0.693878	2.61224	4.5102	0.122449	0333	three_four
12	025s4.jpg	handle	sharp	No_Shaded	hand	17.8	0	1	0	3	curved_sharp	-9.59184	-1.42857	0.632653	0.571429	0.693878	2.61224	4.5102	0.122449	0254	frontal
12	049a1.jpg	backpack	curved	No_Shaded	hand	5	0	0	1	2	curved_sharp	-9.59184	-1.42857	0.632653	0.571429	0.693878	2.61224	4.5102	0.122449	0491	three_four
12	016a4.jpg	lightbulb	curved	No_Shaded	hand	77.4	1	0	0	1	sharp_curved	-9.59184	-1.42857	0.632653	0.571429	0.693878	2.61224	4.5102	0.122449	0164	frontal
12	010s4.jpg	clock	sharp	No_Shaded	computer	88.6	1	0	0	1	curved_sharp	-9.59184	-1.42857	0.632653	0.571429	0.693878	2.61224	4.5102	0.122449	0104	frontal
12	040s5.jpg	watch	sharp	Shaded	hand	96.8	1	0	0	1	curved_sharp	-9.59184	-1.42857	0.632653	0.571429	0.693878	2.61224	4.5102	0.122449	0405	three_four
12	034a3.jpg	handle	curved	Shaded	hand	16.2	0	1	0	3	curved_sharp	-9.59184	-1.42857	0.632653	0.571429	0.693878	2.61224	4.5102	0.122449	0343	frontal
12	040a6.jpg	chair	curved	Shaded	hand	72.6	1	0	0	1	curved_sharp	-9.59184	-1.42857	0.632653	0.571429	0.693878	2.61224	4.5102	0.122449	0406	three_four
12	050s5.jpg	tvmonitor	sharp	No_Shaded	computer	82.2	1	0	0	1	sharp_curved	-9.59184	-1.42857	0.632653	0.571429	0.693878	2.61224	4.5102	0.122449	0505	frontal
12	025a6.jpg	comb	curved	No_Shaded	hand	83.8	1	0	0	1	curved_sharp	-9.59184	-1.42857	0.632653	0.571429	0.693878	2.61224	4.5102	0.122449	0256	frontal
12	019a5.jpg	tap	curved	Shaded	computer	12.6	0	1	0	3	sharp_curved	-9.59184	-1.42857	0.632653	0.571429	0.693878	2.61224	4.5102	0.122449	0195	three_four
12	052s2.jpg	photo frame	sharp	No_Shaded	computer	12.2	0	1	0	3	curved_sharp	-9.59184	-1.42857	0.632653	0.571429	0.693878	2.61224	4.5102	0.122449	0522	three_four
12	027a2.jpg	electric guitar	curved	No_Shaded	computer	92.2	1	0	0	1	sharp_curved	-9.59184	-1.42857	0.632653	0.571429	0.693878	2.61224	4.5102	0.122449	0272	frontal
12	039s1.jpg	coffee maker	sharp	Shaded	hand	42.8	0	1	0	3	sharp_curved	-9.59184	-1.42857	0.632653	0.571429	0.693878	2.61224	4.5102	0.122449	0391	frontal
12	049s4.jpg	lamp	sharp	No_Shaded	hand	94.2	1	0	0	1	sharp_curved	-9.59184	-1.42857	0.632653	0.571429	0.693878	2.61224	4.5102	0.122449	0494	frontal
12	017a5.jpg	headphones	curved	No_Shaded	hand	100	0	1	0	3	curved_sharp	-9.59184	-1.42857	0.632653	0.571429	0.693878	2.61224	4.5102	0.122449	0175	frontal
12	008a1.jpg	mirror	curved	No_Shaded	computer	43.6	0	1	0	3	curved_sharp	-9.59184	-1.42857	0.632653	0.571429	0.693878	2.61224	4.5102	0.122449	0081	three_four
12	034a6.jpg	radio	curved	Shaded	hand	72.8	0	1	0	3	sharp_curved	-9.59184	-1.42857	0.632653	0.571429	0.693878	2.61224	4.5102	0.122449	0346	frontal
12	039a3.jpg	glass	curved	Shaded	hand	22.2	0	0	1	2	curved_sharp	-9.59184	-1.42857	0.632653	0.571429	0.693878	2.61224	4.5102	0.122449	0393	frontal
12	025s5.jpg	glasses	sharp	No_Shaded	hand	84.2	1	0	0	1	curved_sharp	-9.59184	-1.42857	0.632653	0.571429	0.693878	2.61224	4.5102	0.122449	0255	three_four
12	022a4.jpg	glass/cup	curved	Shaded	hand	81.6	1	0	0	1	sharp_curved	-9.59184	-1.42857	0.632653	0.571429	0.693878	2.61224	4.5102	0.122449	0224	frontal
12	016s4.jpg	lightbulb	sharp	No_Shaded	hand	19.6	1	0	0	1	sharp_curved	-9.59184	-1.42857	0.632653	0.571429	0.693878	2.61224	4.5102	0.122449	0164	frontal
12	014s5.jpg	cap	sharp	No_Shaded	hand	25.8	1	0	0	1	sharp_curved	-9.59184	-1.42857	0.632653	0.571429	0.693878	2.61224	4.5102	0.122449	0145	three_four
12	012a6.jpg	door	curved	No_Shaded	hand	77.6	1	0	0	1	sharp_curved	-9.59184	-1.42857	0.632653	0.571429	0.693878	2.61224	4.5102	0.122449	0126	frontal
12	050a4.jpg	coffee maker	curved	No_Shaded	computer	50.4	0	1	0	3	sharp_curved	-9.59184	-1.42857	0.632653	0.571429	0.693878	2.61224	4.5102	0.122449	0504	frontal
12	034s4.jpg	sponge	sharp	Shaded	hand	27.8	1	0	0	1	sharp_curved	-9.59184	-1.42857	0.632653	0.571429	0.693878	2.61224	4.5102	0.122449	0344	three_four
12	033a6.jpg	teapot	curved	No_Shaded	hand	31.2	1	0	0	1	curved_sharp	-9.59184	-1.42857	0.632653	0.571429	0.693878	2.61224	4.5102	0.122449	0336	frontal
12	049s2.jpg	tv	sharp	No_Shaded	hand	95.6	0	0	1	2	curved_sharp	-9.59184	-1.42857	0.632653	0.571429	0.693878	2.61224	4.5102	0.122449	0492	frontal
12	049a4.jpg	lamp	curved	No_Shaded	hand	94	1	0	0	1	sharp_curved	-9.59184	-1.42857	0.632653	0.571429	0.693878	2.61224	4.5102	0.122449	0494	frontal
13	010s1.jpg	handbag	sharp	No_Shaded	computer	10.8	0	0	1	2	sharp_curved	3.40816	-0.428571	-4.36735	-3.42857	-1.30612	0.612245	-2.4898	-4.87755	0101	frontal
13	052s2.jpg	photo frame	sharp	No_Shaded	computer	33	0	0	1	2	sharp_curved	3.40816	-0.428571	-4.36735	-3.42857	-1.30612	0.612245	-2.4898	-4.87755	0522	three_four
13	014s5.jpg	cap	sharp	No_Shaded	hand	75.6	1	0	0	1	curved_sharp	3.40816	-0.428571	-4.36735	-3.42857	-1.30612	0.612245	-2.4898	-4.87755	0145	three_four
13	033a6.jpg	teapot	curved	No_Shaded	hand	43.6	1	0	0	1	curved_sharp	3.40816	-0.428571	-4.36735	-3.42857	-1.30612	0.612245	-2.4898	-4.87755	0336	frontal
13	002s3.jpg	lamp	sharp	No_Shaded	hand	64.8	0	1	0	3	sharp_curved	3.40816	-0.428571	-4.36735	-3.42857	-1.30612	0.612245	-2.4898	-4.87755	0023	three_four
13	049a1.jpg	backpack	curved	No_Shaded	hand	93.6	1	0	0	1	curved_sharp	3.40816	-0.428571	-4.36735	-3.42857	-1.30612	0.612245	-2.4898	-4.87755	0491	three_four
13	021a4.jpg	remote control	curved	No_Shaded	computer	24.8	0	0	1	2	curved_sharp	3.40816	-0.428571	-4.36735	-3.42857	-1.30612	0.612245	-2.4898	-4.87755	0214	three_four
13	016a6.jpg	watch	curved	No_Shaded	hand	87.6	1	0	0	1	curved_sharp	3.40816	-0.428571	-4.36735	-3.42857	-1.30612	0.612245	-2.4898	-4.87755	0166	frontal
13	052a2.jpg	photo frame	curved	No_Shaded	computer	37	0	0	1	2	sharp_curved	3.40816	-0.428571	-4.36735	-3.42857	-1.30612	0.612245	-2.4898	-4.87755	0522	three_four
13	001s3.jpg	pen	sharp	No_Shaded	computer	48	0	0	1	2	sharp_curved	3.40816	-0.428571	-4.36735	-3.42857	-1.30612	0.612245	-2.4898	-4.87755	0013	three_four
13	034s4.jpg	sponge	sharp	Shaded	hand	26.4	1	0	0	1	sharp_curved	3.40816	-0.428571	-4.36735	-3.42857	-1.30612	0.612245	-2.4898	-4.87755	0344	three_four
13	040s6.jpg	chair	sharp	Shaded	hand	43.6	0	1	0	3	sharp_curved	3.40816	-0.428571	-4.36735	-3.42857	-1.30612	0.612245	-2.4898	-4.87755	0406	three_four
13	017s1.jpg	lighter	sharp	Shaded	hand	22.6	0	0	1	2	sharp_curved	3.40816	-0.428571	-4.36735	-3.42857	-1.30612	0.612245	-2.4898	-4.87755	0171	three_four
13	049a2.jpg	tv	curved	No_Shaded	hand	63.2	1	0	0	1	sharp_curved	3.40816	-0.428571	-4.36735	-3.42857	-1.30612	0.612245	-2.4898	-4.87755	0492	frontal
13	001a3.jpg	pen	curved	No_Shaded	computer	66	0	0	1	2	sharp_curved	3.40816	-0.428571	-4.36735	-3.42857	-1.30612	0.612245	-2.4898	-4.87755	0013	three_four
13	019a4.jpg	duct tape	curved	Shaded	computer	47.4	1	0	0	1	sharp_curved	3.40816	-0.428571	-4.36735	-3.42857	-1.30612	0.612245	-2.4898	-4.87755	0194	three_four
13	010s4.jpg	clock	sharp	No_Shaded	computer	32.2	1	0	0	1	sharp_curved	3.40816	-0.428571	-4.36735	-3.42857	-1.30612	0.612245	-2.4898	-4.87755	0104	frontal
13	034s3.jpg	handle	sharp	Shaded	hand	14.4	0	1	0	3	curved_sharp	3.40816	-0.428571	-4.36735	-3.42857	-1.30612	0.612245	-2.4898	-4.87755	0343	frontal
13	002a5.jpg	umbrella	curved	No_Shaded	hand	50.8	1	0	0	1	sharp_curved	3.40816	-0.428571	-4.36735	-3.42857	-1.30612	0.612245	-2.4898	-4.87755	0025	frontal
13	010s7.jpg	remote control	sharp	No_Shaded	hand	32.8	0	0	1	2	sharp_curved	3.40816	-0.428571	-4.36735	-3.42857	-1.30612	0.612245	-2.4898	-4.87755	0107	three_four
13	034s6.jpg	radio	sharp	Shaded	hand	94.4	0	1	0	3	sharp_curved	3.40816	-0.428571	-4.36735	-3.42857	-1.30612	0.612245	-2.4898	-4.87755	0346	frontal
13	025a4.jpg	handle	curved	No_Shaded	hand	21.8	0	1	0	3	curved_sharp	3.40816	-0.428571	-4.36735	-3.42857	-1.30612	0.612245	-2.4898	-4.87755	0254	frontal
13	033s3.jpg	toaster	sharp	No_Shaded	hand	47	1	0	0	1	sharp_curved	3.40816	-0.428571	-4.36735	-3.42857	-1.30612	0.612245	-2.4898	-4.87755	0333	three_four
13	010a6.jpg	mirror	curved	No_Shaded	computer	24	1	0	0	1	curved_sharp	3.40816	-0.428571	-4.36735	-3.42857	-1.30612	0.612245	-2.4898	-4.87755	0106	frontal
13	017a5.jpg	headphones	curved	No_Shaded	hand	57.8	1	0	0	1	curved_sharp	3.40816	-0.428571	-4.36735	-3.42857	-1.30612	0.612245	-2.4898	-4.87755	0175	frontal
13	050s4.jpg	coffee maker	sharp	No_Shaded	computer	75.2	0	1	0	3	sharp_curved	3.40816	-0.428571	-4.36735	-3.42857	-1.30612	0.612245	-2.4898	-4.87755	0504	frontal
13	002s5.jpg	umbrella	sharp	No_Shaded	hand	26.2	1	0	0	1	sharp_curved	3.40816	-0.428571	-4.36735	-3.42857	-1.30612	0.612245	-2.4898	-4.87755	0025	frontal
13	049s2.jpg	tv	sharp	No_Shaded	hand	56.8	1	0	0	1	sharp_curved	3.40816	-0.428571	-4.36735	-3.42857	-1.30612	0.612245	-2.4898	-4.87755	0492	frontal
13	039a3.jpg	glass	curved	Shaded	hand	75.2	1	0	0	1	sharp_curved	3.40816	-0.428571	-4.36735	-3.42857	-1.30612	0.612245	-2.4898	-4.87755	0393	frontal
13	040a2.jpg	scissors	curved	Shaded	hand	94.2	1	0	0	1	sharp_curved	3.40816	-0.428571	-4.36735	-3.42857	-1.30612	0.612245	-2.4898	-4.87755	0402	three_four
13	012a6.jpg	door	curved	No_Shaded	hand	81.6	1	0	0	1	sharp_curved	3.40816	-0.428571	-4.36735	-3.42857	-1.30612	0.612245	-2.4898	-4.87755	0126	frontal
13	010a4.jpg	clock	curved	No_Shaded	computer	69.8	1	0	0	1	sharp_curved	3.40816	-0.428571	-4.36735	-3.42857	-1.30612	0.612245	-2.4898	-4.87755	0104	frontal
13	022s3.jpg	mobile phone	sharp	Shaded	hand	57	0	0	1	2	sharp_curved	3.40816	-0.428571	-4.36735	-3.42857	-1.30612	0.612245	-2.4898	-4.87755	0223	three_four
13	050a4.jpg	coffee maker	curved	No_Shaded	computer	43.8	0	1	0	3	sharp_curved	3.40816	-0.428571	-4.36735	-3.42857	-1.30612	0.612245	-2.4898	-4.87755	0504	frontal
13	010s6.jpg	mirror	sharp	No_Shaded	computer	32.6	1	0	0	1	curved_sharp	3.40816	-0.428571	-4.36735	-3.42857	-1.30612	0.612245	-2.4898	-4.87755	0106	frontal
13	001s1.jpg	hat	sharp	No_Shaded	computer	83.8	0	0	1	2	curved_sharp	3.40816	-0.428571	-4.36735	-3.42857	-1.30612	0.612245	-2.4898	-4.87755	0011	three_four
13	008a1.jpg	mirror	curved	No_Shaded	computer	70.2	1	0	0	1	sharp_curved	3.40816	-0.428571	-4.36735	-3.42857	-1.30612	0.612245	-2.4898	-4.87755	0081	three_four
13	049a4.jpg	lamp	curved	No_Shaded	hand	84.6	0	1	0	3	sharp_curved	3.40816	-0.428571	-4.36735	-3.42857	-1.30612	0.612245	-2.4898	-4.87755	0494	frontal
13	016s6.jpg	watch	sharp	No_Shaded	hand	35	1	0	0	1	curved_sharp	3.40816	-0.428571	-4.36735	-3.42857	-1.30612	0.612245	-2.4898	-4.87755	0166	frontal
13	010a1.jpg	handbag	curved	No_Shaded	computer	44.2	0	0	1	2	sharp_curved	3.40816	-0.428571	-4.36735	-3.42857	-1.30612	0.612245	-2.4898	-4.87755	0101	frontal
13	016a4.jpg	lightbulb	curved	No_Shaded	hand	80.6	1	0	0	1	curved_sharp	3.40816	-0.428571	-4.36735	-3.42857	-1.30612	0.612245	-2.4898	-4.87755	0164	frontal
13	022a4.jpg	glass/cup	curved	Shaded	hand	98.6	0	0	1	2	curved_sharp	3.40816	-0.428571	-4.36735	-3.42857	-1.30612	0.612245	-2.4898	-4.87755	0224	frontal
13	010a7.jpg	remote control	curved	No_Shaded	hand	85	0	0	1	2	sharp_curved	3.40816	-0.428571	-4.36735	-3.42857	-1.30612	0.612245	-2.4898	-4.87755	0107	three_four
13	021s4.jpg	remote control	sharp	No_Shaded	computer	52	0	0	1	2	curved_sharp	3.40816	-0.428571	-4.36735	-3.42857	-1.30612	0.612245	-2.4898	-4.87755	0214	three_four
13	025s6.jpg	comb	sharp	No_Shaded	hand	33.6	1	0	0	1	curved_sharp	3.40816	-0.428571	-4.36735	-3.42857	-1.30612	0.612245	-2.4898	-4.87755	0256	frontal
13	049s4.jpg	lamp	sharp	No_Shaded	hand	98.8	0	1	0	3	sharp_curved	3.40816	-0.428571	-4.36735	-3.42857	-1.30612	0.612245	-2.4898	-4.87755	0494	frontal
13	049s1.jpg	backpack	sharp	No_Shaded	hand	97.4	1	0	0	1	curved_sharp	3.40816	-0.428571	-4.36735	-3.42857	-1.30612	0.612245	-2.4898	-4.87755	0491	three_four
13	040a6.jpg	chair	curved	Shaded	hand	34.8	0	1	0	3	sharp_curved	3.40816	-0.428571	-4.36735	-3.42857	-1.30612	0.612245	-2.4898	-4.87755	0406	three_four
13	008s1.jpg	mirror	sharp	No_Shaded	computer	38.4	1	0	0	1	sharp_curved	3.40816	-0.428571	-4.36735	-3.42857	-1.30612	0.612245	-2.4898	-4.87755	0081	three_four
13	010a3.jpg	glasses	curved	No_Shaded	hand	92.2	1	0	0	1	curved_sharp	3.40816	-0.428571	-4.36735	-3.42857	-1.30612	0.612245	-2.4898	-4.87755	0103	frontal
13	033s6.jpg	teapot	sharp	No_Shaded	hand	10	1	0	0	1	curved_sharp	3.40816	-0.428571	-4.36735	-3.42857	-1.30612	0.612245	-2.4898	-4.87755	0336	frontal
13	019s4.jpg	duct tape	sharp	Shaded	computer	35	1	0	0	1	sharp_curved	3.40816	-0.428571	-4.36735	-3.42857	-1.30612	0.612245	-2.4898	-4.87755	0194	three_four
13	021s3.jpg	toaster	sharp	No_Shaded	computer	14.2	1	0	0	1	curved_sharp	3.40816	-0.428571	-4.36735	-3.42857	-1.30612	0.612245	-2.4898	-4.87755	0213	three_four
13	017a1.jpg	lighter	curved	Shaded	hand	19.2	0	0	1	2	sharp_curved	3.40816	-0.428571	-4.36735	-3.42857	-1.30612	0.612245	-2.4898	-4.87755	0171	three_four
13	040s2.jpg	scissors	sharp	Shaded	hand	87.2	1	0	0	1	sharp_curved	3.40816	-0.428571	-4.36735	-3.42857	-1.30612	0.612245	-2.4898	-4.87755	0402	three_four
13	050s7.jpg	mobile phone	sharp	No_Shaded	computer	5	1	0	0	1	sharp_curved	3.40816	-0.428571	-4.36735	-3.42857	-1.30612	0.612245	-2.4898	-4.87755	0507	frontal
13	040a7.jpg	pencil sharpener	curved	Shaded	hand	86.2	0	0	1	2	curved_sharp	3.40816	-0.428571	-4.36735	-3.42857	-1.30612	0.612245	-2.4898	-4.87755	0407	three_four
13	010s3.jpg	glasses	sharp	No_Shaded	hand	1	1	0	0	1	curved_sharp	3.40816	-0.428571	-4.36735	-3.42857	-1.30612	0.612245	-2.4898	-4.87755	0103	frontal
13	039a1.jpg	coffee maker	curved	Shaded	hand	49.8	0	1	0	3	curved_sharp	3.40816	-0.428571	-4.36735	-3.42857	-1.30612	0.612245	-2.4898	-4.87755	0391	frontal
13	021a3.jpg	toaster	curved	No_Shaded	computer	82	1	0	0	1	curved_sharp	3.40816	-0.428571	-4.36735	-3.42857	-1.30612	0.612245	-2.4898	-4.87755	0213	three_four
13	039s3.jpg	glass	sharp	Shaded	hand	87.2	1	0	0	1	sharp_curved	3.40816	-0.428571	-4.36735	-3.42857	-1.30612	0.612245	-2.4898	-4.87755	0393	frontal
13	014a5.jpg	cap	curved	No_Shaded	hand	97.2	1	0	0	1	curved_sharp	3.40816	-0.428571	-4.36735	-3.42857	-1.30612	0.612245	-2.4898	-4.87755	0145	three_four
13	012s6.jpg	door	sharp	No_Shaded	hand	43.8	1	0	0	1	sharp_curved	3.40816	-0.428571	-4.36735	-3.42857	-1.30612	0.612245	-2.4898	-4.87755	0126	frontal
13	017s5.jpg	headphones	sharp	No_Shaded	hand	6.4	1	0	0	1	curved_sharp	3.40816	-0.428571	-4.36735	-3.42857	-1.30612	0.612245	-2.4898	-4.87755	0175	frontal
13	034a1.jpg	jug	curved	Shaded	hand	96	0	0	1	2	sharp_curved	3.40816	-0.428571	-4.36735	-3.42857	-1.30612	0.612245	-2.4898	-4.87755	0341	frontal
13	034a6.jpg	radio	curved	Shaded	hand	79.6	0	1	0	3	sharp_curved	3.40816	-0.428571	-4.36735	-3.42857	-1.30612	0.612245	-2.4898	-4.87755	0346	frontal
13	002a3.jpg	lamp	curved	No_Shaded	hand	45.4	0	1	0	3	sharp_curved	3.40816	-0.428571	-4.36735	-3.42857	-1.30612	0.612245	-2.4898	-4.87755	0023	three_four
13	025s5.jpg	glasses	sharp	No_Shaded	hand	15.4	1	0	0	1	sharp_curved	3.40816	-0.428571	-4.36735	-3.42857	-1.30612	0.612245	-2.4898	-4.87755	0255	three_four
13	034a4.jpg	sponge	curved	Shaded	hand	51.4	1	0	0	1	sharp_curved	3.40816	-0.428571	-4.36735	-3.42857	-1.30612	0.612245	-2.4898	-4.87755	0344	three_four
13	025a6.jpg	comb	curved	No_Shaded	hand	72.4	1	0	0	1	curved_sharp	3.40816	-0.428571	-4.36735	-3.42857	-1.30612	0.612245	-2.4898	-4.87755	0256	frontal
13	040a5.jpg	watch	curved	Shaded	hand	78.6	1	0	0	1	sharp_curved	3.40816	-0.428571	-4.36735	-3.42857	-1.30612	0.612245	-2.4898	-4.87755	0405	three_four
13	050a5.jpg	tvmonitor	curved	No_Shaded	computer	25.2	0	0	1	2	curved_sharp	3.40816	-0.428571	-4.36735	-3.42857	-1.30612	0.612245	-2.4898	-4.87755	0505	frontal
13	025s4.jpg	handle	sharp	No_Shaded	hand	21.8	0	1	0	3	curved_sharp	3.40816	-0.428571	-4.36735	-3.42857	-1.30612	0.612245	-2.4898	-4.87755	0254	frontal
13	025a5.jpg	glasses	curved	No_Shaded	hand	80.2	1	0	0	1	sharp_curved	3.40816	-0.428571	-4.36735	-3.42857	-1.30612	0.612245	-2.4898	-4.87755	0255	three_four
13	033a3.jpg	toaster	curved	No_Shaded	hand	49.6	1	0	0	1	sharp_curved	3.40816	-0.428571	-4.36735	-3.42857	-1.30612	0.612245	-2.4898	-4.87755	0333	three_four
13	001a1.jpg	hat	curved	No_Shaded	computer	70.2	0	0	1	2	curved_sharp	3.40816	-0.428571	-4.36735	-3.42857	-1.30612	0.612245	-2.4898	-4.87755	0011	three_four
13	050a7.jpg	mobile phone	curved	No_Shaded	computer	83.2	1	0	0	1	sharp_curved	3.40816	-0.428571	-4.36735	-3.42857	-1.30612	0.612245	-2.4898	-4.87755	0507	frontal
13	027s2.jpg	electric guitar	sharp	No_Shaded	computer	83.4	0	0	1	2	curved_sharp	3.40816	-0.428571	-4.36735	-3.42857	-1.30612	0.612245	-2.4898	-4.87755	0272	frontal
13	050s5.jpg	tvmonitor	sharp	No_Shaded	computer	24.4	0	0	1	2	curved_sharp	3.40816	-0.428571	-4.36735	-3.42857	-1.30612	0.612245	-2.4898	-4.87755	0505	frontal
13	034a3.jpg	handle	curved	Shaded	hand	25.6	0	1	0	3	curved_sharp	3.40816	-0.428571	-4.36735	-3.42857	-1.30612	0.612245	-2.4898	-4.87755	0343	frontal
13	019s5.jpg	tap	sharp	Shaded	computer	27.4	1	0	0	1	curved_sharp	3.40816	-0.428571	-4.36735	-3.42857	-1.30612	0.612245	-2.4898	-4.87755	0195	three_four
13	022a3.jpg	mobile phone	curved	Shaded	hand	88.6	0	0	1	2	sharp_curved	3.40816	-0.428571	-4.36735	-3.42857	-1.30612	0.612245	-2.4898	-4.87755	0223	three_four
13	027a2.jpg	electric guitar	curved	No_Shaded	computer	75.4	0	0	1	2	curved_sharp	3.40816	-0.428571	-4.36735	-3.42857	-1.30612	0.612245	-2.4898	-4.87755	0272	frontal
13	034s1.jpg	jug	sharp	Shaded	hand	38.6	0	0	1	2	sharp_curved	3.40816	-0.428571	-4.36735	-3.42857	-1.30612	0.612245	-2.4898	-4.87755	0341	frontal
13	016s4.jpg	lightbulb	sharp	No_Shaded	hand	31.8	1	0	0	1	curved_sharp	3.40816	-0.428571	-4.36735	-3.42857	-1.30612	0.612245	-2.4898	-4.87755	0164	frontal
13	039s1.jpg	coffee maker	sharp	Shaded	hand	99.6	0	1	0	3	curved_sharp	3.40816	-0.428571	-4.36735	-3.42857	-1.30612	0.612245	-2.4898	-4.87755	0391	frontal
13	040s7.jpg	pencil sharpener	sharp	Shaded	hand	72.4	0	0	1	2	curved_sharp	3.40816	-0.428571	-4.36735	-3.42857	-1.30612	0.612245	-2.4898	-4.87755	0407	three_four
13	019a5.jpg	tap	curved	Shaded	computer	51.4	1	0	0	1	curved_sharp	3.40816	-0.428571	-4.36735	-3.42857	-1.30612	0.612245	-2.4898	-4.87755	0195	three_four
13	022s4.jpg	glass/cup	sharp	Shaded	hand	88.8	0	0	1	2	curved_sharp	3.40816	-0.428571	-4.36735	-3.42857	-1.30612	0.612245	-2.4898	-4.87755	0224	frontal
13	040s5.jpg	watch	sharp	Shaded	hand	38	1	0	0	1	sharp_curved	3.40816	-0.428571	-4.36735	-3.42857	-1.30612	0.612245	-2.4898	-4.87755	0405	three_four
14	008a1.jpg	mirror	curved	No_Shaded	computer	24	0	0	1	2	sharp_curved	-3.59184	-1.42857	-2.36735	-2.42857	-2.30612	-0.387755	-3.4898	-7.87755	0081	three_four
14	027s2.jpg	electric guitar	sharp	No_Shaded	computer	47.6	1	0	0	1	sharp_curved	-3.59184	-1.42857	-2.36735	-2.42857	-2.30612	-0.387755	-3.4898	-7.87755	0272	frontal
14	025a5.jpg	glasses	curved	No_Shaded	hand	53	1	0	0	1	sharp_curved	-3.59184	-1.42857	-2.36735	-2.42857	-2.30612	-0.387755	-3.4898	-7.87755	0255	three_four
14	039s3.jpg	glass	sharp	Shaded	hand	47.8	0	0	1	2	sharp_curved	-3.59184	-1.42857	-2.36735	-2.42857	-2.30612	-0.387755	-3.4898	-7.87755	0393	frontal
14	050a7.jpg	mobile phone	curved	No_Shaded	computer	45.8	0	0	1	2	curved_sharp	-3.59184	-1.42857	-2.36735	-2.42857	-2.30612	-0.387755	-3.4898	-7.87755	0507	frontal
14	049s2.jpg	tv	sharp	No_Shaded	hand	55	0	0	1	2	sharp_curved	-3.59184	-1.42857	-2.36735	-2.42857	-2.30612	-0.387755	-3.4898	-7.87755	0492	frontal
14	034s6.jpg	radio	sharp	Shaded	hand	69.2	0	0	1	2	sharp_curved	-3.59184	-1.42857	-2.36735	-2.42857	-2.30612	-0.387755	-3.4898	-7.87755	0346	frontal
14	050a5.jpg	tvmonitor	curved	No_Shaded	computer	39.6	0	1	0	3	sharp_curved	-3.59184	-1.42857	-2.36735	-2.42857	-2.30612	-0.387755	-3.4898	-7.87755	0505	frontal
14	010s4.jpg	clock	sharp	No_Shaded	computer	56.2	0	1	0	3	sharp_curved	-3.59184	-1.42857	-2.36735	-2.42857	-2.30612	-0.387755	-3.4898	-7.87755	0104	frontal
14	016a4.jpg	lightbulb	curved	No_Shaded	hand	39	1	0	0	1	sharp_curved	-3.59184	-1.42857	-2.36735	-2.42857	-2.30612	-0.387755	-3.4898	-7.87755	0164	frontal
14	049a1.jpg	backpack	curved	No_Shaded	hand	68.2	0	0	1	2	sharp_curved	-3.59184	-1.42857	-2.36735	-2.42857	-2.30612	-0.387755	-3.4898	-7.87755	0491	three_four
14	016s6.jpg	watch	sharp	No_Shaded	hand	38.4	0	0	1	2	curved_sharp	-3.59184	-1.42857	-2.36735	-2.42857	-2.30612	-0.387755	-3.4898	-7.87755	0166	frontal
14	010a6.jpg	mirror	curved	No_Shaded	computer	49.2	0	0	1	2	sharp_curved	-3.59184	-1.42857	-2.36735	-2.42857	-2.30612	-0.387755	-3.4898	-7.87755	0106	frontal
14	022a4.jpg	glass/cup	curved	Shaded	hand	79.8	0	0	1	2	curved_sharp	-3.59184	-1.42857	-2.36735	-2.42857	-2.30612	-0.387755	-3.4898	-7.87755	0224	frontal
14	040s5.jpg	watch	sharp	Shaded	hand	20	0	0	1	2	sharp_curved	-3.59184	-1.42857	-2.36735	-2.42857	-2.30612	-0.387755	-3.4898	-7.87755	0405	three_four
14	025s6.jpg	comb	sharp	No_Shaded	hand	40.6	1	0	0	1	sharp_curved	-3.59184	-1.42857	-2.36735	-2.42857	-2.30612	-0.387755	-3.4898	-7.87755	0256	frontal
14	019a4.jpg	duct tape	curved	Shaded	computer	76.4	0	1	0	3	curved_sharp	-3.59184	-1.42857	-2.36735	-2.42857	-2.30612	-0.387755	-3.4898	-7.87755	0194	three_four
14	019s5.jpg	tap	sharp	Shaded	computer	67	0	1	0	3	sharp_curved	-3.59184	-1.42857	-2.36735	-2.42857	-2.30612	-0.387755	-3.4898	-7.87755	0195	three_four
14	049s1.jpg	backpack	sharp	No_Shaded	hand	56.2	0	0	1	2	sharp_curved	-3.59184	-1.42857	-2.36735	-2.42857	-2.30612	-0.387755	-3.4898	-7.87755	0491	three_four
14	033s6.jpg	teapot	sharp	No_Shaded	hand	4.8	1	0	0	1	sharp_curved	-3.59184	-1.42857	-2.36735	-2.42857	-2.30612	-0.387755	-3.4898	-7.87755	0336	frontal
14	040s2.jpg	scissors	sharp	Shaded	hand	32	1	0	0	1	curved_sharp	-3.59184	-1.42857	-2.36735	-2.42857	-2.30612	-0.387755	-3.4898	-7.87755	0402	three_four
14	016a6.jpg	watch	curved	No_Shaded	hand	38.4	0	0	1	2	curved_sharp	-3.59184	-1.42857	-2.36735	-2.42857	-2.30612	-0.387755	-3.4898	-7.87755	0166	frontal
14	008s1.jpg	mirror	sharp	No_Shaded	computer	47.4	0	0	1	2	sharp_curved	-3.59184	-1.42857	-2.36735	-2.42857	-2.30612	-0.387755	-3.4898	-7.87755	0081	three_four
14	034s1.jpg	jug	sharp	Shaded	hand	7.6	1	0	0	1	curved_sharp	-3.59184	-1.42857	-2.36735	-2.42857	-2.30612	-0.387755	-3.4898	-7.87755	0341	frontal
14	040a7.jpg	pencil sharpener	curved	Shaded	hand	3.4	0	1	0	3	curved_sharp	-3.59184	-1.42857	-2.36735	-2.42857	-2.30612	-0.387755	-3.4898	-7.87755	0407	three_four
14	021a4.jpg	remote control	curved	No_Shaded	computer	34.2	0	1	0	3	curved_sharp	-3.59184	-1.42857	-2.36735	-2.42857	-2.30612	-0.387755	-3.4898	-7.87755	0214	three_four
14	040s6.jpg	chair	sharp	Shaded	hand	23.6	0	0	1	2	sharp_curved	-3.59184	-1.42857	-2.36735	-2.42857	-2.30612	-0.387755	-3.4898	-7.87755	0406	three_four
14	014a5.jpg	cap	curved	No_Shaded	hand	76.2	0	0	1	2	sharp_curved	-3.59184	-1.42857	-2.36735	-2.42857	-2.30612	-0.387755	-3.4898	-7.87755	0145	three_four
14	021s3.jpg	toaster	sharp	No_Shaded	computer	46.4	0	1	0	3	curved_sharp	-3.59184	-1.42857	-2.36735	-2.42857	-2.30612	-0.387755	-3.4898	-7.87755	0213	three_four
14	001s1.jpg	hat	sharp	No_Shaded	computer	37.4	1	0	0	1	sharp_curved	-3.59184	-1.42857	-2.36735	-2.42857	-2.30612	-0.387755	-3.4898	-7.87755	0011	three_four
14	012a6.jpg	door	curved	No_Shaded	hand	34.6	0	0	1	2	curved_sharp	-3.59184	-1.42857	-2.36735	-2.42857	-2.30612	-0.387755	-3.4898	-7.87755	0126	frontal
14	017s1.jpg	lighter	sharp	Shaded	hand	31	1	0	0	1	sharp_curved	-3.59184	-1.42857	-2.36735	-2.42857	-2.30612	-0.387755	-3.4898	-7.87755	0171	three_four
14	034a3.jpg	handle	curved	Shaded	hand	31.2	0	0	1	2	sharp_curved	-3.59184	-1.42857	-2.36735	-2.42857	-2.30612	-0.387755	-3.4898	-7.87755	0343	frontal
14	049s4.jpg	lamp	sharp	No_Shaded	hand	63.2	0	0	1	2	sharp_curved	-3.59184	-1.42857	-2.36735	-2.42857	-2.30612	-0.387755	-3.4898	-7.87755	0494	frontal
14	010a1.jpg	handbag	curved	No_Shaded	computer	14.4	0	0	1	2	sharp_curved	-3.59184	-1.42857	-2.36735	-2.42857	-2.30612	-0.387755	-3.4898	-7.87755	0101	frontal
14	050s5.jpg	tvmonitor	sharp	No_Shaded	computer	44.8	0	1	0	3	sharp_curved	-3.59184	-1.42857	-2.36735	-2.42857	-2.30612	-0.387755	-3.4898	-7.87755	0505	frontal
14	025s5.jpg	glasses	sharp	No_Shaded	hand	46.4	1	0	0	1	sharp_curved	-3.59184	-1.42857	-2.36735	-2.42857	-2.30612	-0.387755	-3.4898	-7.87755	0255	three_four
14	040s7.jpg	pencil sharpener	sharp	Shaded	hand	11	0	1	0	3	curved_sharp	-3.59184	-1.42857	-2.36735	-2.42857	-2.30612	-0.387755	-3.4898	-7.87755	0407	three_four
14	021a3.jpg	toaster	curved	No_Shaded	computer	29.8	0	1	0	3	curved_sharp	-3.59184	-1.42857	-2.36735	-2.42857	-2.30612	-0.387755	-3.4898	-7.87755	0213	three_four
14	049a2.jpg	tv	curved	No_Shaded	hand	49.8	0	0	1	2	sharp_curved	-3.59184	-1.42857	-2.36735	-2.42857	-2.30612	-0.387755	-3.4898	-7.87755	0492	frontal
14	050s4.jpg	coffee maker	sharp	No_Shaded	computer	55.6	0	1	0	3	curved_sharp	-3.59184	-1.42857	-2.36735	-2.42857	-2.30612	-0.387755	-3.4898	-7.87755	0504	frontal
14	027a2.jpg	electric guitar	curved	No_Shaded	computer	61	1	0	0	1	sharp_curved	-3.59184	-1.42857	-2.36735	-2.42857	-2.30612	-0.387755	-3.4898	-7.87755	0272	frontal
14	033a3.jpg	toaster	curved	No_Shaded	hand	10.4	0	1	0	3	curved_sharp	-3.59184	-1.42857	-2.36735	-2.42857	-2.30612	-0.387755	-3.4898	-7.87755	0333	three_four
14	034s3.jpg	handle	sharp	Shaded	hand	37.4	0	0	1	2	sharp_curved	-3.59184	-1.42857	-2.36735	-2.42857	-2.30612	-0.387755	-3.4898	-7.87755	0343	frontal
14	019a5.jpg	tap	curved	Shaded	computer	77.2	0	1	0	3	sharp_curved	-3.59184	-1.42857	-2.36735	-2.42857	-2.30612	-0.387755	-3.4898	-7.87755	0195	three_four
14	050a4.jpg	coffee maker	curved	No_Shaded	computer	53.6	0	1	0	3	curved_sharp	-3.59184	-1.42857	-2.36735	-2.42857	-2.30612	-0.387755	-3.4898	-7.87755	0504	frontal
14	034a1.jpg	jug	curved	Shaded	hand	65.2	1	0	0	1	curved_sharp	-3.59184	-1.42857	-2.36735	-2.42857	-2.30612	-0.387755	-3.4898	-7.87755	0341	frontal
14	049a4.jpg	lamp	curved	No_Shaded	hand	57	0	0	1	2	sharp_curved	-3.59184	-1.42857	-2.36735	-2.42857	-2.30612	-0.387755	-3.4898	-7.87755	0494	frontal
14	002s5.jpg	umbrella	sharp	No_Shaded	hand	31.6	1	0	0	1	sharp_curved	-3.59184	-1.42857	-2.36735	-2.42857	-2.30612	-0.387755	-3.4898	-7.87755	0025	frontal
14	010s1.jpg	handbag	sharp	No_Shaded	computer	22	0	0	1	2	sharp_curved	-3.59184	-1.42857	-2.36735	-2.42857	-2.30612	-0.387755	-3.4898	-7.87755	0101	frontal
14	001a3.jpg	pen	curved	No_Shaded	computer	45	1	0	0	1	sharp_curved	-3.59184	-1.42857	-2.36735	-2.42857	-2.30612	-0.387755	-3.4898	-7.87755	0013	three_four
14	017a5.jpg	headphones	curved	No_Shaded	hand	47	0	0	1	2	curved_sharp	-3.59184	-1.42857	-2.36735	-2.42857	-2.30612	-0.387755	-3.4898	-7.87755	0175	frontal
14	025a4.jpg	handle	curved	No_Shaded	hand	24.6	0	1	0	3	sharp_curved	-3.59184	-1.42857	-2.36735	-2.42857	-2.30612	-0.387755	-3.4898	-7.87755	0254	frontal
14	010s3.jpg	glasses	sharp	No_Shaded	hand	16	0	0	1	2	curved_sharp	-3.59184	-1.42857	-2.36735	-2.42857	-2.30612	-0.387755	-3.4898	-7.87755	0103	frontal
14	050s7.jpg	mobile phone	sharp	No_Shaded	computer	50	0	0	1	2	curved_sharp	-3.59184	-1.42857	-2.36735	-2.42857	-2.30612	-0.387755	-3.4898	-7.87755	0507	frontal
14	040a2.jpg	scissors	curved	Shaded	hand	36.6	1	0	0	1	curved_sharp	-3.59184	-1.42857	-2.36735	-2.42857	-2.30612	-0.387755	-3.4898	-7.87755	0402	three_four
14	019s4.jpg	duct tape	sharp	Shaded	computer	83.4	0	1	0	3	curved_sharp	-3.59184	-1.42857	-2.36735	-2.42857	-2.30612	-0.387755	-3.4898	-7.87755	0194	three_four
14	025s4.jpg	handle	sharp	No_Shaded	hand	30.8	0	1	0	3	sharp_curved	-3.59184	-1.42857	-2.36735	-2.42857	-2.30612	-0.387755	-3.4898	-7.87755	0254	frontal
14	033a6.jpg	teapot	curved	No_Shaded	hand	21.4	1	0	0	1	sharp_curved	-3.59184	-1.42857	-2.36735	-2.42857	-2.30612	-0.387755	-3.4898	-7.87755	0336	frontal
14	012s6.jpg	door	sharp	No_Shaded	hand	7.6	0	0	1	2	curved_sharp	-3.59184	-1.42857	-2.36735	-2.42857	-2.30612	-0.387755	-3.4898	-7.87755	0126	frontal
14	021s4.jpg	remote control	sharp	No_Shaded	computer	75.8	0	1	0	3	curved_sharp	-3.59184	-1.42857	-2.36735	-2.42857	-2.30612	-0.387755	-3.4898	-7.87755	0214	three_four
14	022a3.jpg	mobile phone	curved	Shaded	hand	77.2	0	0	1	2	curved_sharp	-3.59184	-1.42857	-2.36735	-2.42857	-2.30612	-0.387755	-3.4898	-7.87755	0223	three_four
14	014s5.jpg	cap	sharp	No_Shaded	hand	48.6	0	0	1	2	sharp_curved	-3.59184	-1.42857	-2.36735	-2.42857	-2.30612	-0.387755	-3.4898	-7.87755	0145	three_four
14	002s3.jpg	lamp	sharp	No_Shaded	hand	30.4	1	0	0	1	sharp_curved	-3.59184	-1.42857	-2.36735	-2.42857	-2.30612	-0.387755	-3.4898	-7.87755	0023	three_four
14	034s4.jpg	sponge	sharp	Shaded	hand	7.2	0	0	1	2	curved_sharp	-3.59184	-1.42857	-2.36735	-2.42857	-2.30612	-0.387755	-3.4898	-7.87755	0344	three_four
14	017a1.jpg	lighter	curved	Shaded	hand	36.8	1	0	0	1	sharp_curved	-3.59184	-1.42857	-2.36735	-2.42857	-2.30612	-0.387755	-3.4898	-7.87755	0171	three_four
14	022s4.jpg	glass/cup	sharp	Shaded	hand	67.6	0	0	1	2	curved_sharp	-3.59184	-1.42857	-2.36735	-2.42857	-2.30612	-0.387755	-3.4898	-7.87755	0224	frontal
14	010a3.jpg	glasses	curved	No_Shaded	hand	13	0	0	1	2	curved_sharp	-3.59184	-1.42857	-2.36735	-2.42857	-2.30612	-0.387755	-3.4898	-7.87755	0103	frontal
14	010a7.jpg	remote control	curved	No_Shaded	hand	20.4	0	0	1	2	sharp_curved	-3.59184	-1.42857	-2.36735	-2.42857	-2.30612	-0.387755	-3.4898	-7.87755	0107	three_four
14	052s2.jpg	photo frame	sharp	No_Shaded	computer	54.6	0	0	1	2	sharp_curved	-3.59184	-1.42857	-2.36735	-2.42857	-2.30612	-0.387755	-3.4898	-7.87755	0522	three_four
14	001a1.jpg	hat	curved	No_Shaded	computer	33.6	1	0	0	1	sharp_curved	-3.59184	-1.42857	-2.36735	-2.42857	-2.30612	-0.387755	-3.4898	-7.87755	0011	three_four
14	022s3.jpg	mobile phone	sharp	Shaded	hand	69	0	0	1	2	curved_sharp	-3.59184	-1.42857	-2.36735	-2.42857	-2.30612	-0.387755	-3.4898	-7.87755	0223	three_four
14	039a1.jpg	coffee maker	curved	Shaded	hand	24.8	0	1	0	3	curved_sharp	-3.59184	-1.42857	-2.36735	-2.42857	-2.30612	-0.387755	-3.4898	-7.87755	0391	frontal
14	034a6.jpg	radio	curved	Shaded	hand	9.6	0	0	1	2	sharp_curved	-3.59184	-1.42857	-2.36735	-2.42857	-2.30612	-0.387755	-3.4898	-7.87755	0346	frontal
14	010a4.jpg	clock	curved	No_Shaded	computer	42.8	0	1	0	3	sharp_curved	-3.59184	-1.42857	-2.36735	-2.42857	-2.30612	-0.387755	-3.4898	-7.87755	0104	frontal
14	033s3.jpg	toaster	sharp	No_Shaded	hand	15	0	1	0	3	curved_sharp	-3.59184	-1.42857	-2.36735	-2.42857	-2.30612	-0.387755	-3.4898	-7.87755	0333	three_four
14	002a3.jpg	lamp	curved	No_Shaded	hand	30	1	0	0	1	sharp_curved	-3.59184	-1.42857	-2.36735	-2.42857	-2.30612	-0.387755	-3.4898	-7.87755	0023	three_four
14	052a2.jpg	photo frame	curved	No_Shaded	computer	57.2	0	0	1	2	sharp_curved	-3.59184	-1.42857	-2.36735	-2.42857	-2.30612	-0.387755	-3.4898	-7.87755	0522	three_four
14	001s3.jpg	pen	sharp	No_Shaded	computer	33.6	1	0	0	1	sharp_curved	-3.59184	-1.42857	-2.36735	-2.42857	-2.30612	-0.387755	-3.4898	-7.87755	0013	three_four
14	010s7.jpg	remote control	sharp	No_Shaded	hand	31.2	0	0	1	2	sharp_curved	-3.59184	-1.42857	-2.36735	-2.42857	-2.30612	-0.387755	-3.4898	-7.87755	0107	three_four
14	039s1.jpg	coffee maker	sharp	Shaded	hand	81.2	0	1	0	3	curved_sharp	-3.59184	-1.42857	-2.36735	-2.42857	-2.30612	-0.387755	-3.4898	-7.87755	0391	frontal
14	039a3.jpg	glass	curved	Shaded	hand	45.4	0	0	1	2	sharp_curved	-3.59184	-1.42857	-2.36735	-2.42857	-2.30612	-0.387755	-3.4898	-7.87755	0393	frontal
14	016s4.jpg	lightbulb	sharp	No_Shaded	hand	10.8	1	0	0	1	sharp_curved	-3.59184	-1.42857	-2.36735	-2.42857	-2.30612	-0.387755	-3.4898	-7.87755	0164	frontal
14	010s6.jpg	mirror	sharp	No_Shaded	computer	16.2	0	0	1	2	sharp_curved	-3.59184	-1.42857	-2.36735	-2.42857	-2.30612	-0.387755	-3.4898	-7.87755	0106	frontal
14	040a6.jpg	chair	curved	Shaded	hand	25	0	0	1	2	sharp_curved	-3.59184	-1.42857	-2.36735	-2.42857	-2.30612	-0.387755	-3.4898	-7.87755	0406	three_four
14	034a4.jpg	sponge	curved	Shaded	hand	23.6	0	0	1	2	curved_sharp	-3.59184	-1.42857	-2.36735	-2.42857	-2.30612	-0.387755	-3.4898	-7.87755	0344	three_four
14	025a6.jpg	comb	curved	No_Shaded	hand	22.2	1	0	0	1	sharp_curved	-3.59184	-1.42857	-2.36735	-2.42857	-2.30612	-0.387755	-3.4898	-7.87755	0256	frontal
14	017s5.jpg	headphones	sharp	No_Shaded	hand	23	0	0	1	2	curved_sharp	-3.59184	-1.42857	-2.36735	-2.42857	-2.30612	-0.387755	-3.4898	-7.87755	0175	frontal
14	002a5.jpg	umbrella	curved	No_Shaded	hand	55	1	0	0	1	sharp_curved	-3.59184	-1.42857	-2.36735	-2.42857	-2.30612	-0.387755	-3.4898	-7.87755	0025	frontal
14	040a5.jpg	watch	curved	Shaded	hand	36.8	0	0	1	2	sharp_curved	-3.59184	-1.42857	-2.36735	-2.42857	-2.30612	-0.387755	-3.4898	-7.87755	0405	three_four
15	022a4.jpg	glass/cup	curved	Shaded	hand	77.4	0	0	1	2	sharp_curved	1.40816	1.57143	-2.36735	-2.42857	-0.306122	-1.38776	0.510204	0.122449	0224	frontal
15	034a6.jpg	radio	curved	Shaded	hand	42.8	0	0	1	2	curved_sharp	1.40816	1.57143	-2.36735	-2.42857	-0.306122	-1.38776	0.510204	0.122449	0346	frontal
15	010a6.jpg	mirror	curved	No_Shaded	computer	75.6	0	0	1	2	curved_sharp	1.40816	1.57143	-2.36735	-2.42857	-0.306122	-1.38776	0.510204	0.122449	0106	frontal
15	033a3.jpg	toaster	curved	No_Shaded	hand	49.8	0	0	1	2	sharp_curved	1.40816	1.57143	-2.36735	-2.42857	-0.306122	-1.38776	0.510204	0.122449	0333	three_four
15	014s5.jpg	cap	sharp	No_Shaded	hand	78	0	0	1	2	sharp_curved	1.40816	1.57143	-2.36735	-2.42857	-0.306122	-1.38776	0.510204	0.122449	0145	three_four
15	033s6.jpg	teapot	sharp	No_Shaded	hand	8	1	0	0	1	curved_sharp	1.40816	1.57143	-2.36735	-2.42857	-0.306122	-1.38776	0.510204	0.122449	0336	frontal
15	039s3.jpg	glass	sharp	Shaded	hand	69.6	1	0	0	1	sharp_curved	1.40816	1.57143	-2.36735	-2.42857	-0.306122	-1.38776	0.510204	0.122449	0393	frontal
15	016a6.jpg	watch	curved	No_Shaded	hand	30.2	0	1	0	3	curved_sharp	1.40816	1.57143	-2.36735	-2.42857	-0.306122	-1.38776	0.510204	0.122449	0166	frontal
15	052s2.jpg	photo frame	sharp	No_Shaded	computer	78.6	0	0	1	2	sharp_curved	1.40816	1.57143	-2.36735	-2.42857	-0.306122	-1.38776	0.510204	0.122449	0522	three_four
15	034a4.jpg	sponge	curved	Shaded	hand	60.2	1	0	0	1	sharp_curved	1.40816	1.57143	-2.36735	-2.42857	-0.306122	-1.38776	0.510204	0.122449	0344	three_four
15	019a5.jpg	tap	curved	Shaded	computer	69.4	0	1	0	3	sharp_curved	1.40816	1.57143	-2.36735	-2.42857	-0.306122	-1.38776	0.510204	0.122449	0195	three_four
15	008a1.jpg	mirror	curved	No_Shaded	computer	92.8	0	0	1	2	curved_sharp	1.40816	1.57143	-2.36735	-2.42857	-0.306122	-1.38776	0.510204	0.122449	0081	three_four
15	010s4.jpg	clock	sharp	No_Shaded	computer	90.4	0	0	1	2	curved_sharp	1.40816	1.57143	-2.36735	-2.42857	-0.306122	-1.38776	0.510204	0.122449	0104	frontal
15	049a4.jpg	lamp	curved	No_Shaded	hand	82.6	0	0	1	2	sharp_curved	1.40816	1.57143	-2.36735	-2.42857	-0.306122	-1.38776	0.510204	0.122449	0494	frontal
15	022s4.jpg	glass/cup	sharp	Shaded	hand	91.8	0	0	1	2	sharp_curved	1.40816	1.57143	-2.36735	-2.42857	-0.306122	-1.38776	0.510204	0.122449	0224	frontal
15	034s3.jpg	handle	sharp	Shaded	hand	43.6	0	0	1	2	sharp_curved	1.40816	1.57143	-2.36735	-2.42857	-0.306122	-1.38776	0.510204	0.122449	0343	frontal
15	050a5.jpg	tvmonitor	curved	No_Shaded	computer	85.4	0	0	1	2	sharp_curved	1.40816	1.57143	-2.36735	-2.42857	-0.306122	-1.38776	0.510204	0.122449	0505	frontal
15	040s7.jpg	pencil sharpener	sharp	Shaded	hand	85.2	0	0	1	2	curved_sharp	1.40816	1.57143	-2.36735	-2.42857	-0.306122	-1.38776	0.510204	0.122449	0407	three_four
15	021a4.jpg	remote control	curved	No_Shaded	computer	87.6	0	0	1	2	sharp_curved	1.40816	1.57143	-2.36735	-2.42857	-0.306122	-1.38776	0.510204	0.122449	0214	three_four
15	012a6.jpg	door	curved	No_Shaded	hand	56.2	0	1	0	3	curved_sharp	1.40816	1.57143	-2.36735	-2.42857	-0.306122	-1.38776	0.510204	0.122449	0126	frontal
15	050s7.jpg	mobile phone	sharp	No_Shaded	computer	79.6	0	0	1	2	sharp_curved	1.40816	1.57143	-2.36735	-2.42857	-0.306122	-1.38776	0.510204	0.122449	0507	frontal
15	002s5.jpg	umbrella	sharp	No_Shaded	hand	45.6	1	0	0	1	sharp_curved	1.40816	1.57143	-2.36735	-2.42857	-0.306122	-1.38776	0.510204	0.122449	0025	frontal
15	040s2.jpg	scissors	sharp	Shaded	hand	82.4	1	0	0	1	sharp_curved	1.40816	1.57143	-2.36735	-2.42857	-0.306122	-1.38776	0.510204	0.122449	0402	three_four
15	040a6.jpg	chair	curved	Shaded	hand	79.4	0	0	1	2	curved_sharp	1.40816	1.57143	-2.36735	-2.42857	-0.306122	-1.38776	0.510204	0.122449	0406	three_four
15	010a1.jpg	handbag	curved	No_Shaded	computer	47.4	0	0	1	2	sharp_curved	1.40816	1.57143	-2.36735	-2.42857	-0.306122	-1.38776	0.510204	0.122449	0101	frontal
15	016s6.jpg	watch	sharp	No_Shaded	hand	60.6	0	1	0	3	curved_sharp	1.40816	1.57143	-2.36735	-2.42857	-0.306122	-1.38776	0.510204	0.122449	0166	frontal
15	049a2.jpg	tv	curved	No_Shaded	hand	62.8	0	0	1	2	curved_sharp	1.40816	1.57143	-2.36735	-2.42857	-0.306122	-1.38776	0.510204	0.122449	0492	frontal
15	016a4.jpg	lightbulb	curved	No_Shaded	hand	24.6	1	0	0	1	sharp_curved	1.40816	1.57143	-2.36735	-2.42857	-0.306122	-1.38776	0.510204	0.122449	0164	frontal
15	050a7.jpg	mobile phone	curved	No_Shaded	computer	85	0	0	1	2	sharp_curved	1.40816	1.57143	-2.36735	-2.42857	-0.306122	-1.38776	0.510204	0.122449	0507	frontal
15	001a1.jpg	hat	curved	No_Shaded	computer	81.2	0	0	1	2	sharp_curved	1.40816	1.57143	-2.36735	-2.42857	-0.306122	-1.38776	0.510204	0.122449	0011	three_four
15	039s1.jpg	coffee maker	sharp	Shaded	hand	76	0	1	0	3	sharp_curved	1.40816	1.57143	-2.36735	-2.42857	-0.306122	-1.38776	0.510204	0.122449	0391	frontal
15	049s1.jpg	backpack	sharp	No_Shaded	hand	88.4	0	0	1	2	curved_sharp	1.40816	1.57143	-2.36735	-2.42857	-0.306122	-1.38776	0.510204	0.122449	0491	three_four
15	019s5.jpg	tap	sharp	Shaded	computer	97.2	0	1	0	3	sharp_curved	1.40816	1.57143	-2.36735	-2.42857	-0.306122	-1.38776	0.510204	0.122449	0195	three_four
15	001a3.jpg	pen	curved	No_Shaded	computer	94.4	0	0	1	2	curved_sharp	1.40816	1.57143	-2.36735	-2.42857	-0.306122	-1.38776	0.510204	0.122449	0013	three_four
15	034s1.jpg	jug	sharp	Shaded	hand	30.4	1	0	0	1	sharp_curved	1.40816	1.57143	-2.36735	-2.42857	-0.306122	-1.38776	0.510204	0.122449	0341	frontal
15	008s1.jpg	mirror	sharp	No_Shaded	computer	92.4	0	0	1	2	curved_sharp	1.40816	1.57143	-2.36735	-2.42857	-0.306122	-1.38776	0.510204	0.122449	0081	three_four
15	049a1.jpg	backpack	curved	No_Shaded	hand	93.6	0	0	1	2	curved_sharp	1.40816	1.57143	-2.36735	-2.42857	-0.306122	-1.38776	0.510204	0.122449	0491	three_four
15	025s4.jpg	handle	sharp	No_Shaded	hand	63.4	0	1	0	3	curved_sharp	1.40816	1.57143	-2.36735	-2.42857	-0.306122	-1.38776	0.510204	0.122449	0254	frontal
15	017a5.jpg	headphones	curved	No_Shaded	hand	53.6	0	0	1	2	sharp_curved	1.40816	1.57143	-2.36735	-2.42857	-0.306122	-1.38776	0.510204	0.122449	0175	frontal
15	010a4.jpg	clock	curved	No_Shaded	computer	97.4	0	0	1	2	curved_sharp	1.40816	1.57143	-2.36735	-2.42857	-0.306122	-1.38776	0.510204	0.122449	0104	frontal
15	010s7.jpg	remote control	sharp	No_Shaded	hand	71.8	0	0	1	2	curved_sharp	1.40816	1.57143	-2.36735	-2.42857	-0.306122	-1.38776	0.510204	0.122449	0107	three_four
15	002s3.jpg	lamp	sharp	No_Shaded	hand	56.4	1	0	0	1	curved_sharp	1.40816	1.57143	-2.36735	-2.42857	-0.306122	-1.38776	0.510204	0.122449	0023	three_four
15	022s3.jpg	mobile phone	sharp	Shaded	hand	97.6	0	0	1	2	sharp_curved	1.40816	1.57143	-2.36735	-2.42857	-0.306122	-1.38776	0.510204	0.122449	0223	three_four
15	040a7.jpg	pencil sharpener	curved	Shaded	hand	95.2	0	0	1	2	curved_sharp	1.40816	1.57143	-2.36735	-2.42857	-0.306122	-1.38776	0.510204	0.122449	0407	three_four
15	050s4.jpg	coffee maker	sharp	No_Shaded	computer	92	0	1	0	3	sharp_curved	1.40816	1.57143	-2.36735	-2.42857	-0.306122	-1.38776	0.510204	0.122449	0504	frontal
15	019a4.jpg	duct tape	curved	Shaded	computer	87.4	0	0	1	2	curved_sharp	1.40816	1.57143	-2.36735	-2.42857	-0.306122	-1.38776	0.510204	0.122449	0194	three_four
15	033a6.jpg	teapot	curved	No_Shaded	hand	12.6	1	0	0	1	curved_sharp	1.40816	1.57143	-2.36735	-2.42857	-0.306122	-1.38776	0.510204	0.122449	0336	frontal
15	016s4.jpg	lightbulb	sharp	No_Shaded	hand	8.8	1	0	0	1	sharp_curved	1.40816	1.57143	-2.36735	-2.42857	-0.306122	-1.38776	0.510204	0.122449	0164	frontal
15	040a5.jpg	watch	curved	Shaded	hand	97	0	0	1	2	sharp_curved	1.40816	1.57143	-2.36735	-2.42857	-0.306122	-1.38776	0.510204	0.122449	0405	three_four
15	014a5.jpg	cap	curved	No_Shaded	hand	90.4	0	0	1	2	sharp_curved	1.40816	1.57143	-2.36735	-2.42857	-0.306122	-1.38776	0.510204	0.122449	0145	three_four
15	010s3.jpg	glasses	sharp	No_Shaded	hand	27.4	1	0	0	1	curved_sharp	1.40816	1.57143	-2.36735	-2.42857	-0.306122	-1.38776	0.510204	0.122449	0103	frontal
15	010s1.jpg	handbag	sharp	No_Shaded	computer	46.6	0	0	1	2	sharp_curved	1.40816	1.57143	-2.36735	-2.42857	-0.306122	-1.38776	0.510204	0.122449	0101	frontal
15	025a6.jpg	comb	curved	No_Shaded	hand	84	0	0	1	2	curved_sharp	1.40816	1.57143	-2.36735	-2.42857	-0.306122	-1.38776	0.510204	0.122449	0256	frontal
15	017s5.jpg	headphones	sharp	No_Shaded	hand	33	0	0	1	2	sharp_curved	1.40816	1.57143	-2.36735	-2.42857	-0.306122	-1.38776	0.510204	0.122449	0175	frontal
15	049s4.jpg	lamp	sharp	No_Shaded	hand	81.2	0	0	1	2	sharp_curved	1.40816	1.57143	-2.36735	-2.42857	-0.306122	-1.38776	0.510204	0.122449	0494	frontal
15	021s3.jpg	toaster	sharp	No_Shaded	computer	87	0	0	1	2	curved_sharp	1.40816	1.57143	-2.36735	-2.42857	-0.306122	-1.38776	0.510204	0.122449	0213	three_four
15	002a5.jpg	umbrella	curved	No_Shaded	hand	26.6	1	0	0	1	sharp_curved	1.40816	1.57143	-2.36735	-2.42857	-0.306122	-1.38776	0.510204	0.122449	0025	frontal
15	012s6.jpg	door	sharp	No_Shaded	hand	26	0	1	0	3	curved_sharp	1.40816	1.57143	-2.36735	-2.42857	-0.306122	-1.38776	0.510204	0.122449	0126	frontal
15	033s3.jpg	toaster	sharp	No_Shaded	hand	43.8	0	0	1	2	sharp_curved	1.40816	1.57143	-2.36735	-2.42857	-0.306122	-1.38776	0.510204	0.122449	0333	three_four
15	034s6.jpg	radio	sharp	Shaded	hand	76.8	0	0	1	2	curved_sharp	1.40816	1.57143	-2.36735	-2.42857	-0.306122	-1.38776	0.510204	0.122449	0346	frontal
15	017a1.jpg	lighter	curved	Shaded	hand	97	0	0	1	2	sharp_curved	1.40816	1.57143	-2.36735	-2.42857	-0.306122	-1.38776	0.510204	0.122449	0171	three_four
15	010s6.jpg	mirror	sharp	No_Shaded	computer	78.4	0	0	1	2	curved_sharp	1.40816	1.57143	-2.36735	-2.42857	-0.306122	-1.38776	0.510204	0.122449	0106	frontal
15	001s1.jpg	hat	sharp	No_Shaded	computer	75.4	0	0	1	2	sharp_curved	1.40816	1.57143	-2.36735	-2.42857	-0.306122	-1.38776	0.510204	0.122449	0011	three_four
15	010a3.jpg	glasses	curved	No_Shaded	hand	44.2	1	0	0	1	curved_sharp	1.40816	1.57143	-2.36735	-2.42857	-0.306122	-1.38776	0.510204	0.122449	0103	frontal
15	025s6.jpg	comb	sharp	No_Shaded	hand	78.2	0	0	1	2	curved_sharp	1.40816	1.57143	-2.36735	-2.42857	-0.306122	-1.38776	0.510204	0.122449	0256	frontal
15	040s6.jpg	chair	sharp	Shaded	hand	81.2	0	0	1	2	curved_sharp	1.40816	1.57143	-2.36735	-2.42857	-0.306122	-1.38776	0.510204	0.122449	0406	three_four
15	025s5.jpg	glasses	sharp	No_Shaded	hand	74.6	1	0	0	1	sharp_curved	1.40816	1.57143	-2.36735	-2.42857	-0.306122	-1.38776	0.510204	0.122449	0255	three_four
15	052a2.jpg	photo frame	curved	No_Shaded	computer	83.4	0	0	1	2	sharp_curved	1.40816	1.57143	-2.36735	-2.42857	-0.306122	-1.38776	0.510204	0.122449	0522	three_four
15	034a1.jpg	jug	curved	Shaded	hand	73.8	1	0	0	1	sharp_curved	1.40816	1.57143	-2.36735	-2.42857	-0.306122	-1.38776	0.510204	0.122449	0341	frontal
15	049s2.jpg	tv	sharp	No_Shaded	hand	64.4	0	0	1	2	curved_sharp	1.40816	1.57143	-2.36735	-2.42857	-0.306122	-1.38776	0.510204	0.122449	0492	frontal
15	034s4.jpg	sponge	sharp	Shaded	hand	48.4	1	0	0	1	sharp_curved	1.40816	1.57143	-2.36735	-2.42857	-0.306122	-1.38776	0.510204	0.122449	0344	three_four
15	040s5.jpg	watch	sharp	Shaded	hand	89.6	0	0	1	2	sharp_curved	1.40816	1.57143	-2.36735	-2.42857	-0.306122	-1.38776	0.510204	0.122449	0405	three_four
15	039a1.jpg	coffee maker	curved	Shaded	hand	68.2	0	1	0	3	sharp_curved	1.40816	1.57143	-2.36735	-2.42857	-0.306122	-1.38776	0.510204	0.122449	0391	frontal
15	021a3.jpg	toaster	curved	No_Shaded	computer	68	0	0	1	2	curved_sharp	1.40816	1.57143	-2.36735	-2.42857	-0.306122	-1.38776	0.510204	0.122449	0213	three_four
15	027a2.jpg	electric guitar	curved	No_Shaded	computer	85.6	0	0	1	2	curved_sharp	1.40816	1.57143	-2.36735	-2.42857	-0.306122	-1.38776	0.510204	0.122449	0272	frontal
15	034a3.jpg	handle	curved	Shaded	hand	55.4	0	0	1	2	sharp_curved	1.40816	1.57143	-2.36735	-2.42857	-0.306122	-1.38776	0.510204	0.122449	0343	frontal
15	001s3.jpg	pen	sharp	No_Shaded	computer	89.8	0	0	1	2	curved_sharp	1.40816	1.57143	-2.36735	-2.42857	-0.306122	-1.38776	0.510204	0.122449	0013	three_four
15	022a3.jpg	mobile phone	curved	Shaded	hand	98.2	0	0	1	2	sharp_curved	1.40816	1.57143	-2.36735	-2.42857	-0.306122	-1.38776	0.510204	0.122449	0223	three_four
15	019s4.jpg	duct tape	sharp	Shaded	computer	97.8	0	0	1	2	curved_sharp	1.40816	1.57143	-2.36735	-2.42857	-0.306122	-1.38776	0.510204	0.122449	0194	three_four
15	017s1.jpg	lighter	sharp	Shaded	hand	88.2	0	0	1	2	sharp_curved	1.40816	1.57143	-2.36735	-2.42857	-0.306122	-1.38776	0.510204	0.122449	0171	three_four
15	039a3.jpg	glass	curved	Shaded	hand	76.2	1	0	0	1	sharp_curved	1.40816	1.57143	-2.36735	-2.42857	-0.306122	-1.38776	0.510204	0.122449	0393	frontal
15	010a7.jpg	remote control	curved	No_Shaded	hand	53.2	0	0	1	2	curved_sharp	1.40816	1.57143	-2.36735	-2.42857	-0.306122	-1.38776	0.510204	0.122449	0107	three_four
15	021s4.jpg	remote control	sharp	No_Shaded	computer	84.4	0	0	1	2	sharp_curved	1.40816	1.57143	-2.36735	-2.42857	-0.306122	-1.38776	0.510204	0.122449	0214	three_four
15	025a5.jpg	glasses	curved	No_Shaded	hand	82	1	0	0	1	sharp_curved	1.40816	1.57143	-2.36735	-2.42857	-0.306122	-1.38776	0.510204	0.122449	0255	three_four
15	040a2.jpg	scissors	curved	Shaded	hand	95.4	1	0	0	1	sharp_curved	1.40816	1.57143	-2.36735	-2.42857	-0.306122	-1.38776	0.510204	0.122449	0402	three_four
15	025a4.jpg	handle	curved	No_Shaded	hand	28.4	0	1	0	3	curved_sharp	1.40816	1.57143	-2.36735	-2.42857	-0.306122	-1.38776	0.510204	0.122449	0254	frontal
15	050a4.jpg	coffee maker	curved	No_Shaded	computer	79.4	0	1	0	3	sharp_curved	1.40816	1.57143	-2.36735	-2.42857	-0.306122	-1.38776	0.510204	0.122449	0504	frontal
15	050s5.jpg	tvmonitor	sharp	No_Shaded	computer	76.2	0	0	1	2	sharp_curved	1.40816	1.57143	-2.36735	-2.42857	-0.306122	-1.38776	0.510204	0.122449	0505	frontal
15	002a3.jpg	lamp	curved	No_Shaded	hand	35.6	1	0	0	1	curved_sharp	1.40816	1.57143	-2.36735	-2.42857	-0.306122	-1.38776	0.510204	0.122449	0023	three_four
15	027s2.jpg	electric guitar	sharp	No_Shaded	computer	85.2	0	0	1	2	curved_sharp	1.40816	1.57143	-2.36735	-2.42857	-0.306122	-1.38776	0.510204	0.122449	0272	frontal
16	021s3.jpg	toaster	sharp	No_Shaded	computer	51.8	0	1	0	3	curved_sharp	1.40816	-1.42857	3.63265	-1.42857	2.69388	-0.387755	1.5102	-5.87755	0213	three_four
16	049s2.jpg	tv	sharp	No_Shaded	hand	65.6	0	1	0	3	sharp_curved	1.40816	-1.42857	3.63265	-1.42857	2.69388	-0.387755	1.5102	-5.87755	0492	frontal
16	034s3.jpg	handle	sharp	Shaded	hand	85.6	0	1	0	3	curved_sharp	1.40816	-1.42857	3.63265	-1.42857	2.69388	-0.387755	1.5102	-5.87755	0343	frontal
16	050a5.jpg	tvmonitor	curved	No_Shaded	computer	25.8	0	1	0	3	curved_sharp	1.40816	-1.42857	3.63265	-1.42857	2.69388	-0.387755	1.5102	-5.87755	0505	frontal
16	033a6.jpg	teapot	curved	No_Shaded	hand	15.8	0	0	1	2	sharp_curved	1.40816	-1.42857	3.63265	-1.42857	2.69388	-0.387755	1.5102	-5.87755	0336	frontal
16	019s4.jpg	duct tape	sharp	Shaded	computer	99	0	1	0	3	sharp_curved	1.40816	-1.42857	3.63265	-1.42857	2.69388	-0.387755	1.5102	-5.87755	0194	three_four
16	025s4.jpg	handle	sharp	No_Shaded	hand	28	0	1	0	3	curved_sharp	1.40816	-1.42857	3.63265	-1.42857	2.69388	-0.387755	1.5102	-5.87755	0254	frontal
16	040s2.jpg	scissors	sharp	Shaded	hand	100	1	0	0	1	sharp_curved	1.40816	-1.42857	3.63265	-1.42857	2.69388	-0.387755	1.5102	-5.87755	0402	three_four
16	049s4.jpg	lamp	sharp	No_Shaded	hand	11.8	1	0	0	1	sharp_curved	1.40816	-1.42857	3.63265	-1.42857	2.69388	-0.387755	1.5102	-5.87755	0494	frontal
16	033a3.jpg	toaster	curved	No_Shaded	hand	11	1	0	0	1	curved_sharp	1.40816	-1.42857	3.63265	-1.42857	2.69388	-0.387755	1.5102	-5.87755	0333	three_four
16	016s6.jpg	watch	sharp	No_Shaded	hand	28	1	0	0	1	curved_sharp	1.40816	-1.42857	3.63265	-1.42857	2.69388	-0.387755	1.5102	-5.87755	0166	frontal
16	040s5.jpg	watch	sharp	Shaded	hand	99.6	1	0	0	1	sharp_curved	1.40816	-1.42857	3.63265	-1.42857	2.69388	-0.387755	1.5102	-5.87755	0405	three_four
16	052s2.jpg	photo frame	sharp	No_Shaded	computer	0.8	0	0	1	2	sharp_curved	1.40816	-1.42857	3.63265	-1.42857	2.69388	-0.387755	1.5102	-5.87755	0522	three_four
16	002a5.jpg	umbrella	curved	No_Shaded	hand	11.2	1	0	0	1	curved_sharp	1.40816	-1.42857	3.63265	-1.42857	2.69388	-0.387755	1.5102	-5.87755	0025	frontal
16	022a4.jpg	glass/cup	curved	Shaded	hand	99.6	1	0	0	1	sharp_curved	1.40816	-1.42857	3.63265	-1.42857	2.69388	-0.387755	1.5102	-5.87755	0224	frontal
16	039s1.jpg	coffee maker	sharp	Shaded	hand	99.2	0	1	0	3	curved_sharp	1.40816	-1.42857	3.63265	-1.42857	2.69388	-0.387755	1.5102	-5.87755	0391	frontal
16	040s7.jpg	pencil sharpener	sharp	Shaded	hand	99.2	0	1	0	3	curved_sharp	1.40816	-1.42857	3.63265	-1.42857	2.69388	-0.387755	1.5102	-5.87755	0407	three_four
16	022a3.jpg	mobile phone	curved	Shaded	hand	98.8	1	0	0	1	sharp_curved	1.40816	-1.42857	3.63265	-1.42857	2.69388	-0.387755	1.5102	-5.87755	0223	three_four
16	021s4.jpg	remote control	sharp	No_Shaded	computer	17.2	0	1	0	3	sharp_curved	1.40816	-1.42857	3.63265	-1.42857	2.69388	-0.387755	1.5102	-5.87755	0214	three_four
16	002s5.jpg	umbrella	sharp	No_Shaded	hand	22.6	1	0	0	1	curved_sharp	1.40816	-1.42857	3.63265	-1.42857	2.69388	-0.387755	1.5102	-5.87755	0025	frontal
16	001a3.jpg	pen	curved	No_Shaded	computer	66.4	1	0	0	1	curved_sharp	1.40816	-1.42857	3.63265	-1.42857	2.69388	-0.387755	1.5102	-5.87755	0013	three_four
16	010a1.jpg	handbag	curved	No_Shaded	computer	15.2	1	0	0	1	sharp_curved	1.40816	-1.42857	3.63265	-1.42857	2.69388	-0.387755	1.5102	-5.87755	0101	frontal
16	050s4.jpg	coffee maker	sharp	No_Shaded	computer	17.2	1	0	0	1	curved_sharp	1.40816	-1.42857	3.63265	-1.42857	2.69388	-0.387755	1.5102	-5.87755	0504	frontal
16	001s1.jpg	hat	sharp	No_Shaded	computer	36.2	0	0	1	2	curved_sharp	1.40816	-1.42857	3.63265	-1.42857	2.69388	-0.387755	1.5102	-5.87755	0011	three_four
16	019a4.jpg	duct tape	curved	Shaded	computer	100	0	1	0	3	sharp_curved	1.40816	-1.42857	3.63265	-1.42857	2.69388	-0.387755	1.5102	-5.87755	0194	three_four
16	049a4.jpg	lamp	curved	No_Shaded	hand	44.4	1	0	0	1	sharp_curved	1.40816	-1.42857	3.63265	-1.42857	2.69388	-0.387755	1.5102	-5.87755	0494	frontal
16	008s1.jpg	mirror	sharp	No_Shaded	computer	0.6	1	0	0	1	sharp_curved	1.40816	-1.42857	3.63265	-1.42857	2.69388	-0.387755	1.5102	-5.87755	0081	three_four
16	034a4.jpg	sponge	curved	Shaded	hand	71.8	1	0	0	1	sharp_curved	1.40816	-1.42857	3.63265	-1.42857	2.69388	-0.387755	1.5102	-5.87755	0344	three_four
16	012a6.jpg	door	curved	No_Shaded	hand	9.4	0	1	0	3	curved_sharp	1.40816	-1.42857	3.63265	-1.42857	2.69388	-0.387755	1.5102	-5.87755	0126	frontal
16	014s5.jpg	cap	sharp	No_Shaded	hand	59.6	1	0	0	1	sharp_curved	1.40816	-1.42857	3.63265	-1.42857	2.69388	-0.387755	1.5102	-5.87755	0145	three_four
16	021a4.jpg	remote control	curved	No_Shaded	computer	13.4	0	1	0	3	sharp_curved	1.40816	-1.42857	3.63265	-1.42857	2.69388	-0.387755	1.5102	-5.87755	0214	three_four
16	002s3.jpg	lamp	sharp	No_Shaded	hand	14.2	1	0	0	1	sharp_curved	1.40816	-1.42857	3.63265	-1.42857	2.69388	-0.387755	1.5102	-5.87755	0023	three_four
16	033s3.jpg	toaster	sharp	No_Shaded	hand	10.2	1	0	0	1	curved_sharp	1.40816	-1.42857	3.63265	-1.42857	2.69388	-0.387755	1.5102	-5.87755	0333	three_four
16	025a4.jpg	handle	curved	No_Shaded	hand	16.8	0	1	0	3	curved_sharp	1.40816	-1.42857	3.63265	-1.42857	2.69388	-0.387755	1.5102	-5.87755	0254	frontal
16	010s3.jpg	glasses	sharp	No_Shaded	hand	23	1	0	0	1	curved_sharp	1.40816	-1.42857	3.63265	-1.42857	2.69388	-0.387755	1.5102	-5.87755	0103	frontal
16	001a1.jpg	hat	curved	No_Shaded	computer	5.8	0	0	1	2	curved_sharp	1.40816	-1.42857	3.63265	-1.42857	2.69388	-0.387755	1.5102	-5.87755	0011	three_four
16	033s6.jpg	teapot	sharp	No_Shaded	hand	0.8	0	0	1	2	sharp_curved	1.40816	-1.42857	3.63265	-1.42857	2.69388	-0.387755	1.5102	-5.87755	0336	frontal
16	027a2.jpg	electric guitar	curved	No_Shaded	computer	13.2	1	0	0	1	curved_sharp	1.40816	-1.42857	3.63265	-1.42857	2.69388	-0.387755	1.5102	-5.87755	0272	frontal
16	039a3.jpg	glass	curved	Shaded	hand	100	1	0	0	1	sharp_curved	1.40816	-1.42857	3.63265	-1.42857	2.69388	-0.387755	1.5102	-5.87755	0393	frontal
16	025a6.jpg	comb	curved	No_Shaded	hand	25.2	1	0	0	1	sharp_curved	1.40816	-1.42857	3.63265	-1.42857	2.69388	-0.387755	1.5102	-5.87755	0256	frontal
16	016a6.jpg	watch	curved	No_Shaded	hand	99.8	1	0	0	1	curved_sharp	1.40816	-1.42857	3.63265	-1.42857	2.69388	-0.387755	1.5102	-5.87755	0166	frontal
16	010s4.jpg	clock	sharp	No_Shaded	computer	5.6	1	0	0	1	curved_sharp	1.40816	-1.42857	3.63265	-1.42857	2.69388	-0.387755	1.5102	-5.87755	0104	frontal
16	052a2.jpg	photo frame	curved	No_Shaded	computer	10.2	0	0	1	2	sharp_curved	1.40816	-1.42857	3.63265	-1.42857	2.69388	-0.387755	1.5102	-5.87755	0522	three_four
16	034a1.jpg	jug	curved	Shaded	hand	97.2	0	0	1	2	curved_sharp	1.40816	-1.42857	3.63265	-1.42857	2.69388	-0.387755	1.5102	-5.87755	0341	frontal
16	039a1.jpg	coffee maker	curved	Shaded	hand	77	0	1	0	3	curved_sharp	1.40816	-1.42857	3.63265	-1.42857	2.69388	-0.387755	1.5102	-5.87755	0391	frontal
16	040a6.jpg	chair	curved	Shaded	hand	91.8	0	1	0	3	sharp_curved	1.40816	-1.42857	3.63265	-1.42857	2.69388	-0.387755	1.5102	-5.87755	0406	three_four
16	017s1.jpg	lighter	sharp	Shaded	hand	74.6	1	0	0	1	curved_sharp	1.40816	-1.42857	3.63265	-1.42857	2.69388	-0.387755	1.5102	-5.87755	0171	three_four
16	025s5.jpg	glasses	sharp	No_Shaded	hand	43	1	0	0	1	sharp_curved	1.40816	-1.42857	3.63265	-1.42857	2.69388	-0.387755	1.5102	-5.87755	0255	three_four
16	049a1.jpg	backpack	curved	No_Shaded	hand	36.6	0	0	1	2	sharp_curved	1.40816	-1.42857	3.63265	-1.42857	2.69388	-0.387755	1.5102	-5.87755	0491	three_four
16	002a3.jpg	lamp	curved	No_Shaded	hand	25.6	1	0	0	1	sharp_curved	1.40816	-1.42857	3.63265	-1.42857	2.69388	-0.387755	1.5102	-5.87755	0023	three_four
16	034s6.jpg	radio	sharp	Shaded	hand	99.4	1	0	0	1	sharp_curved	1.40816	-1.42857	3.63265	-1.42857	2.69388	-0.387755	1.5102	-5.87755	0346	frontal
16	019s5.jpg	tap	sharp	Shaded	computer	78.2	0	1	0	3	curved_sharp	1.40816	-1.42857	3.63265	-1.42857	2.69388	-0.387755	1.5102	-5.87755	0195	three_four
16	017a5.jpg	headphones	curved	No_Shaded	hand	12.2	1	0	0	1	sharp_curved	1.40816	-1.42857	3.63265	-1.42857	2.69388	-0.387755	1.5102	-5.87755	0175	frontal
16	010s6.jpg	mirror	sharp	No_Shaded	computer	10	1	0	0	1	curved_sharp	1.40816	-1.42857	3.63265	-1.42857	2.69388	-0.387755	1.5102	-5.87755	0106	frontal
16	021a3.jpg	toaster	curved	No_Shaded	computer	12.2	0	1	0	3	curved_sharp	1.40816	-1.42857	3.63265	-1.42857	2.69388	-0.387755	1.5102	-5.87755	0213	three_four
16	027s2.jpg	electric guitar	sharp	No_Shaded	computer	6.4	1	0	0	1	curved_sharp	1.40816	-1.42857	3.63265	-1.42857	2.69388	-0.387755	1.5102	-5.87755	0272	frontal
16	034s4.jpg	sponge	sharp	Shaded	hand	84	1	0	0	1	sharp_curved	1.40816	-1.42857	3.63265	-1.42857	2.69388	-0.387755	1.5102	-5.87755	0344	three_four
16	040a5.jpg	watch	curved	Shaded	hand	99.4	1	0	0	1	sharp_curved	1.40816	-1.42857	3.63265	-1.42857	2.69388	-0.387755	1.5102	-5.87755	0405	three_four
16	049s1.jpg	backpack	sharp	No_Shaded	hand	28.6	0	0	1	2	sharp_curved	1.40816	-1.42857	3.63265	-1.42857	2.69388	-0.387755	1.5102	-5.87755	0491	three_four
16	019a5.jpg	tap	curved	Shaded	computer	79.6	0	1	0	3	curved_sharp	1.40816	-1.42857	3.63265	-1.42857	2.69388	-0.387755	1.5102	-5.87755	0195	three_four
16	025a5.jpg	glasses	curved	No_Shaded	hand	14.8	1	0	0	1	sharp_curved	1.40816	-1.42857	3.63265	-1.42857	2.69388	-0.387755	1.5102	-5.87755	0255	three_four
16	017s5.jpg	headphones	sharp	No_Shaded	hand	8	1	0	0	1	sharp_curved	1.40816	-1.42857	3.63265	-1.42857	2.69388	-0.387755	1.5102	-5.87755	0175	frontal
16	010s7.jpg	remote control	sharp	No_Shaded	hand	7.4	0	1	0	3	curved_sharp	1.40816	-1.42857	3.63265	-1.42857	2.69388	-0.387755	1.5102	-5.87755	0107	three_four
16	034a6.jpg	radio	curved	Shaded	hand	94	1	0	0	1	sharp_curved	1.40816	-1.42857	3.63265	-1.42857	2.69388	-0.387755	1.5102	-5.87755	0346	frontal
16	014a5.jpg	cap	curved	No_Shaded	hand	68.4	1	0	0	1	sharp_curved	1.40816	-1.42857	3.63265	-1.42857	2.69388	-0.387755	1.5102	-5.87755	0145	three_four
16	050s7.jpg	mobile phone	sharp	No_Shaded	computer	6.6	1	0	0	1	curved_sharp	1.40816	-1.42857	3.63265	-1.42857	2.69388	-0.387755	1.5102	-5.87755	0507	frontal
16	016a4.jpg	lightbulb	curved	No_Shaded	hand	69.8	1	0	0	1	sharp_curved	1.40816	-1.42857	3.63265	-1.42857	2.69388	-0.387755	1.5102	-5.87755	0164	frontal
16	012s6.jpg	door	sharp	No_Shaded	hand	31.2	0	1	0	3	curved_sharp	1.40816	-1.42857	3.63265	-1.42857	2.69388	-0.387755	1.5102	-5.87755	0126	frontal
16	049a2.jpg	tv	curved	No_Shaded	hand	16.8	0	1	0	3	sharp_curved	1.40816	-1.42857	3.63265	-1.42857	2.69388	-0.387755	1.5102	-5.87755	0492	frontal
16	040a2.jpg	scissors	curved	Shaded	hand	94	1	0	0	1	sharp_curved	1.40816	-1.42857	3.63265	-1.42857	2.69388	-0.387755	1.5102	-5.87755	0402	three_four
16	001s3.jpg	pen	sharp	No_Shaded	computer	76.4	1	0	0	1	curved_sharp	1.40816	-1.42857	3.63265	-1.42857	2.69388	-0.387755	1.5102	-5.87755	0013	three_four
16	040a7.jpg	pencil sharpener	curved	Shaded	hand	98.6	0	1	0	3	curved_sharp	1.40816	-1.42857	3.63265	-1.42857	2.69388	-0.387755	1.5102	-5.87755	0407	three_four
16	010a6.jpg	mirror	curved	No_Shaded	computer	26.2	1	0	0	1	curved_sharp	1.40816	-1.42857	3.63265	-1.42857	2.69388	-0.387755	1.5102	-5.87755	0106	frontal
16	050s5.jpg	tvmonitor	sharp	No_Shaded	computer	10	0	1	0	3	curved_sharp	1.40816	-1.42857	3.63265	-1.42857	2.69388	-0.387755	1.5102	-5.87755	0505	frontal
16	025s6.jpg	comb	sharp	No_Shaded	hand	25.4	1	0	0	1	sharp_curved	1.40816	-1.42857	3.63265	-1.42857	2.69388	-0.387755	1.5102	-5.87755	0256	frontal
16	010s1.jpg	handbag	sharp	No_Shaded	computer	6.4	1	0	0	1	sharp_curved	1.40816	-1.42857	3.63265	-1.42857	2.69388	-0.387755	1.5102	-5.87755	0101	frontal
16	017a1.jpg	lighter	curved	Shaded	hand	99	1	0	0	1	curved_sharp	1.40816	-1.42857	3.63265	-1.42857	2.69388	-0.387755	1.5102	-5.87755	0171	three_four
16	010a3.jpg	glasses	curved	No_Shaded	hand	8.6	1	0	0	1	curved_sharp	1.40816	-1.42857	3.63265	-1.42857	2.69388	-0.387755	1.5102	-5.87755	0103	frontal
16	010a7.jpg	remote control	curved	No_Shaded	hand	6.4	0	1	0	3	curved_sharp	1.40816	-1.42857	3.63265	-1.42857	2.69388	-0.387755	1.5102	-5.87755	0107	three_four
16	039s3.jpg	glass	sharp	Shaded	hand	85.6	1	0	0	1	sharp_curved	1.40816	-1.42857	3.63265	-1.42857	2.69388	-0.387755	1.5102	-5.87755	0393	frontal
16	022s4.jpg	glass/cup	sharp	Shaded	hand	98.2	1	0	0	1	sharp_curved	1.40816	-1.42857	3.63265	-1.42857	2.69388	-0.387755	1.5102	-5.87755	0224	frontal
16	034s1.jpg	jug	sharp	Shaded	hand	66.8	0	0	1	2	curved_sharp	1.40816	-1.42857	3.63265	-1.42857	2.69388	-0.387755	1.5102	-5.87755	0341	frontal
16	040s6.jpg	chair	sharp	Shaded	hand	95	0	1	0	3	sharp_curved	1.40816	-1.42857	3.63265	-1.42857	2.69388	-0.387755	1.5102	-5.87755	0406	three_four
16	050a4.jpg	coffee maker	curved	No_Shaded	computer	16.6	1	0	0	1	curved_sharp	1.40816	-1.42857	3.63265	-1.42857	2.69388	-0.387755	1.5102	-5.87755	0504	frontal
16	010a4.jpg	clock	curved	No_Shaded	computer	12.8	1	0	0	1	curved_sharp	1.40816	-1.42857	3.63265	-1.42857	2.69388	-0.387755	1.5102	-5.87755	0104	frontal
16	016s4.jpg	lightbulb	sharp	No_Shaded	hand	20	1	0	0	1	sharp_curved	1.40816	-1.42857	3.63265	-1.42857	2.69388	-0.387755	1.5102	-5.87755	0164	frontal
16	022s3.jpg	mobile phone	sharp	Shaded	hand	94.2	1	0	0	1	sharp_curved	1.40816	-1.42857	3.63265	-1.42857	2.69388	-0.387755	1.5102	-5.87755	0223	three_four
16	034a3.jpg	handle	curved	Shaded	hand	9.4	0	1	0	3	curved_sharp	1.40816	-1.42857	3.63265	-1.42857	2.69388	-0.387755	1.5102	-5.87755	0343	frontal
16	050a7.jpg	mobile phone	curved	No_Shaded	computer	9.4	1	0	0	1	curved_sharp	1.40816	-1.42857	3.63265	-1.42857	2.69388	-0.387755	1.5102	-5.87755	0507	frontal
16	008a1.jpg	mirror	curved	No_Shaded	computer	8.6	1	0	0	1	sharp_curved	1.40816	-1.42857	3.63265	-1.42857	2.69388	-0.387755	1.5102	-5.87755	0081	three_four
17	022s3.jpg	mobile phone	sharp	Shaded	hand	62	1	0	0	1	curved_sharp	-7.59184	-1.42857	-17.3673	-1.42857	2.69388	-3.38776	-9.4898	-6.87755	0223	three_four
17	014s5.jpg	cap	sharp	No_Shaded	hand	25.6	0	0	1	2	curved_sharp	-7.59184	-1.42857	-17.3673	-1.42857	2.69388	-3.38776	-9.4898	-6.87755	0145	three_four
17	049s1.jpg	backpack	sharp	No_Shaded	hand	29.4	0	0	1	2	sharp_curved	-7.59184	-1.42857	-17.3673	-1.42857	2.69388	-3.38776	-9.4898	-6.87755	0491	three_four
17	010a6.jpg	mirror	curved	No_Shaded	computer	22.2	0	1	0	3	sharp_curved	-7.59184	-1.42857	-17.3673	-1.42857	2.69388	-3.38776	-9.4898	-6.87755	0106	frontal
17	001a3.jpg	pen	curved	No_Shaded	computer	65.8	1	0	0	1	curved_sharp	-7.59184	-1.42857	-17.3673	-1.42857	2.69388	-3.38776	-9.4898	-6.87755	0013	three_four
17	002s5.jpg	umbrella	sharp	No_Shaded	hand	47	1	0	0	1	curved_sharp	-7.59184	-1.42857	-17.3673	-1.42857	2.69388	-3.38776	-9.4898	-6.87755	0025	frontal
17	025s4.jpg	handle	sharp	No_Shaded	hand	25.8	1	0	0	1	sharp_curved	-7.59184	-1.42857	-17.3673	-1.42857	2.69388	-3.38776	-9.4898	-6.87755	0254	frontal
17	034a4.jpg	sponge	curved	Shaded	hand	7.6	0	0	1	2	sharp_curved	-7.59184	-1.42857	-17.3673	-1.42857	2.69388	-3.38776	-9.4898	-6.87755	0344	three_four
17	040a2.jpg	scissors	curved	Shaded	hand	36	1	0	0	1	curved_sharp	-7.59184	-1.42857	-17.3673	-1.42857	2.69388	-3.38776	-9.4898	-6.87755	0402	three_four
17	017s1.jpg	lighter	sharp	Shaded	hand	30.6	1	0	0	1	sharp_curved	-7.59184	-1.42857	-17.3673	-1.42857	2.69388	-3.38776	-9.4898	-6.87755	0171	three_four
17	019s5.jpg	tap	sharp	Shaded	computer	32.4	0	0	1	2	curved_sharp	-7.59184	-1.42857	-17.3673	-1.42857	2.69388	-3.38776	-9.4898	-6.87755	0195	three_four
17	025s6.jpg	comb	sharp	No_Shaded	hand	14.8	1	0	0	1	curved_sharp	-7.59184	-1.42857	-17.3673	-1.42857	2.69388	-3.38776	-9.4898	-6.87755	0256	frontal
17	049a1.jpg	backpack	curved	No_Shaded	hand	34	0	0	1	2	sharp_curved	-7.59184	-1.42857	-17.3673	-1.42857	2.69388	-3.38776	-9.4898	-6.87755	0491	three_four
17	010a3.jpg	glasses	curved	No_Shaded	hand	45.2	1	0	0	1	curved_sharp	-7.59184	-1.42857	-17.3673	-1.42857	2.69388	-3.38776	-9.4898	-6.87755	0103	frontal
17	033a3.jpg	toaster	curved	No_Shaded	hand	43	0	1	0	3	curved_sharp	-7.59184	-1.42857	-17.3673	-1.42857	2.69388	-3.38776	-9.4898	-6.87755	0333	three_four
17	034s1.jpg	jug	sharp	Shaded	hand	24.4	1	0	0	1	sharp_curved	-7.59184	-1.42857	-17.3673	-1.42857	2.69388	-3.38776	-9.4898	-6.87755	0341	frontal
17	010s4.jpg	clock	sharp	No_Shaded	computer	62.6	0	0	1	2	sharp_curved	-7.59184	-1.42857	-17.3673	-1.42857	2.69388	-3.38776	-9.4898	-6.87755	0104	frontal
17	034a3.jpg	handle	curved	Shaded	hand	50	1	0	0	1	sharp_curved	-7.59184	-1.42857	-17.3673	-1.42857	2.69388	-3.38776	-9.4898	-6.87755	0343	frontal
17	021s3.jpg	toaster	sharp	No_Shaded	computer	82.6	0	1	0	3	sharp_curved	-7.59184	-1.42857	-17.3673	-1.42857	2.69388	-3.38776	-9.4898	-6.87755	0213	three_four
17	040s2.jpg	scissors	sharp	Shaded	hand	68.6	1	0	0	1	curved_sharp	-7.59184	-1.42857	-17.3673	-1.42857	2.69388	-3.38776	-9.4898	-6.87755	0402	three_four
17	012a6.jpg	door	curved	No_Shaded	hand	32.2	0	1	0	3	sharp_curved	-7.59184	-1.42857	-17.3673	-1.42857	2.69388	-3.38776	-9.4898	-6.87755	0126	frontal
17	017a5.jpg	headphones	curved	No_Shaded	hand	38.8	1	0	0	1	curved_sharp	-7.59184	-1.42857	-17.3673	-1.42857	2.69388	-3.38776	-9.4898	-6.87755	0175	frontal
17	022a4.jpg	glass/cup	curved	Shaded	hand	99.8	0	0	1	2	curved_sharp	-7.59184	-1.42857	-17.3673	-1.42857	2.69388	-3.38776	-9.4898	-6.87755	0224	frontal
17	021s4.jpg	remote control	sharp	No_Shaded	computer	16	0	1	0	3	sharp_curved	-7.59184	-1.42857	-17.3673	-1.42857	2.69388	-3.38776	-9.4898	-6.87755	0214	three_four
17	010s7.jpg	remote control	sharp	No_Shaded	hand	32.4	1	0	0	1	sharp_curved	-7.59184	-1.42857	-17.3673	-1.42857	2.69388	-3.38776	-9.4898	-6.87755	0107	three_four
17	014a5.jpg	cap	curved	No_Shaded	hand	49.6	0	0	1	2	curved_sharp	-7.59184	-1.42857	-17.3673	-1.42857	2.69388	-3.38776	-9.4898	-6.87755	0145	three_four
17	025a6.jpg	comb	curved	No_Shaded	hand	43.8	1	0	0	1	curved_sharp	-7.59184	-1.42857	-17.3673	-1.42857	2.69388	-3.38776	-9.4898	-6.87755	0256	frontal
17	050a7.jpg	mobile phone	curved	No_Shaded	computer	38.2	1	0	0	1	curved_sharp	-7.59184	-1.42857	-17.3673	-1.42857	2.69388	-3.38776	-9.4898	-6.87755	0507	frontal
17	022a3.jpg	mobile phone	curved	Shaded	hand	75.2	1	0	0	1	curved_sharp	-7.59184	-1.42857	-17.3673	-1.42857	2.69388	-3.38776	-9.4898	-6.87755	0223	three_four
17	033s3.jpg	toaster	sharp	No_Shaded	hand	68.8	0	1	0	3	curved_sharp	-7.59184	-1.42857	-17.3673	-1.42857	2.69388	-3.38776	-9.4898	-6.87755	0333	three_four
17	040a5.jpg	watch	curved	Shaded	hand	78.6	0	0	1	2	sharp_curved	-7.59184	-1.42857	-17.3673	-1.42857	2.69388	-3.38776	-9.4898	-6.87755	0405	three_four
17	008s1.jpg	mirror	sharp	No_Shaded	computer	30.8	0	0	1	2	sharp_curved	-7.59184	-1.42857	-17.3673	-1.42857	2.69388	-3.38776	-9.4898	-6.87755	0081	three_four
17	052a2.jpg	photo frame	curved	No_Shaded	computer	52	0	0	1	2	curved_sharp	-7.59184	-1.42857	-17.3673	-1.42857	2.69388	-3.38776	-9.4898	-6.87755	0522	three_four
17	039s3.jpg	glass	sharp	Shaded	hand	69.8	1	0	0	1	curved_sharp	-7.59184	-1.42857	-17.3673	-1.42857	2.69388	-3.38776	-9.4898	-6.87755	0393	frontal
17	019a5.jpg	tap	curved	Shaded	computer	56	0	0	1	2	curved_sharp	-7.59184	-1.42857	-17.3673	-1.42857	2.69388	-3.38776	-9.4898	-6.87755	0195	three_four
17	022s4.jpg	glass/cup	sharp	Shaded	hand	96	0	0	1	2	curved_sharp	-7.59184	-1.42857	-17.3673	-1.42857	2.69388	-3.38776	-9.4898	-6.87755	0224	frontal
17	025a4.jpg	handle	curved	No_Shaded	hand	36.2	1	0	0	1	sharp_curved	-7.59184	-1.42857	-17.3673	-1.42857	2.69388	-3.38776	-9.4898	-6.87755	0254	frontal
17	040s7.jpg	pencil sharpener	sharp	Shaded	hand	72.4	0	0	1	2	sharp_curved	-7.59184	-1.42857	-17.3673	-1.42857	2.69388	-3.38776	-9.4898	-6.87755	0407	three_four
17	034s4.jpg	sponge	sharp	Shaded	hand	71.4	0	0	1	2	sharp_curved	-7.59184	-1.42857	-17.3673	-1.42857	2.69388	-3.38776	-9.4898	-6.87755	0344	three_four
17	002a3.jpg	lamp	curved	No_Shaded	hand	27.6	1	0	0	1	curved_sharp	-7.59184	-1.42857	-17.3673	-1.42857	2.69388	-3.38776	-9.4898	-6.87755	0023	three_four
17	008a1.jpg	mirror	curved	No_Shaded	computer	53.4	0	0	1	2	sharp_curved	-7.59184	-1.42857	-17.3673	-1.42857	2.69388	-3.38776	-9.4898	-6.87755	0081	three_four
17	039a1.jpg	coffee maker	curved	Shaded	hand	50.2	0	1	0	3	curved_sharp	-7.59184	-1.42857	-17.3673	-1.42857	2.69388	-3.38776	-9.4898	-6.87755	0391	frontal
17	040s6.jpg	chair	sharp	Shaded	hand	71	0	0	1	2	curved_sharp	-7.59184	-1.42857	-17.3673	-1.42857	2.69388	-3.38776	-9.4898	-6.87755	0406	three_four
17	010s1.jpg	handbag	sharp	No_Shaded	computer	26.8	0	0	1	2	sharp_curved	-7.59184	-1.42857	-17.3673	-1.42857	2.69388	-3.38776	-9.4898	-6.87755	0101	frontal
17	050s4.jpg	coffee maker	sharp	No_Shaded	computer	71.6	0	0	1	2	sharp_curved	-7.59184	-1.42857	-17.3673	-1.42857	2.69388	-3.38776	-9.4898	-6.87755	0504	frontal
17	034s3.jpg	handle	sharp	Shaded	hand	49.4	1	0	0	1	sharp_curved	-7.59184	-1.42857	-17.3673	-1.42857	2.69388	-3.38776	-9.4898	-6.87755	0343	frontal
17	021a4.jpg	remote control	curved	No_Shaded	computer	48.6	0	1	0	3	sharp_curved	-7.59184	-1.42857	-17.3673	-1.42857	2.69388	-3.38776	-9.4898	-6.87755	0214	three_four
17	019s4.jpg	duct tape	sharp	Shaded	computer	90.4	0	1	0	3	sharp_curved	-7.59184	-1.42857	-17.3673	-1.42857	2.69388	-3.38776	-9.4898	-6.87755	0194	three_four
17	034a6.jpg	radio	curved	Shaded	hand	65.6	0	0	1	2	sharp_curved	-7.59184	-1.42857	-17.3673	-1.42857	2.69388	-3.38776	-9.4898	-6.87755	0346	frontal
17	050s5.jpg	tvmonitor	sharp	No_Shaded	computer	36.4	0	0	1	2	curved_sharp	-7.59184	-1.42857	-17.3673	-1.42857	2.69388	-3.38776	-9.4898	-6.87755	0505	frontal
17	010a4.jpg	clock	curved	No_Shaded	computer	72	0	0	1	2	sharp_curved	-7.59184	-1.42857	-17.3673	-1.42857	2.69388	-3.38776	-9.4898	-6.87755	0104	frontal
17	049s2.jpg	tv	sharp	No_Shaded	hand	46.2	0	0	1	2	sharp_curved	-7.59184	-1.42857	-17.3673	-1.42857	2.69388	-3.38776	-9.4898	-6.87755	0492	frontal
17	010s3.jpg	glasses	sharp	No_Shaded	hand	39	1	0	0	1	curved_sharp	-7.59184	-1.42857	-17.3673	-1.42857	2.69388	-3.38776	-9.4898	-6.87755	0103	frontal
17	017a1.jpg	lighter	curved	Shaded	hand	85.2	1	0	0	1	sharp_curved	-7.59184	-1.42857	-17.3673	-1.42857	2.69388	-3.38776	-9.4898	-6.87755	0171	three_four
17	016a4.jpg	lightbulb	curved	No_Shaded	hand	48.6	1	0	0	1	sharp_curved	-7.59184	-1.42857	-17.3673	-1.42857	2.69388	-3.38776	-9.4898	-6.87755	0164	frontal
17	050s7.jpg	mobile phone	sharp	No_Shaded	computer	37.2	1	0	0	1	curved_sharp	-7.59184	-1.42857	-17.3673	-1.42857	2.69388	-3.38776	-9.4898	-6.87755	0507	frontal
17	040a7.jpg	pencil sharpener	curved	Shaded	hand	82.4	0	0	1	2	sharp_curved	-7.59184	-1.42857	-17.3673	-1.42857	2.69388	-3.38776	-9.4898	-6.87755	0407	three_four
17	049s4.jpg	lamp	sharp	No_Shaded	hand	67.6	0	0	1	2	sharp_curved	-7.59184	-1.42857	-17.3673	-1.42857	2.69388	-3.38776	-9.4898	-6.87755	0494	frontal
17	025a5.jpg	glasses	curved	No_Shaded	hand	49	1	0	0	1	curved_sharp	-7.59184	-1.42857	-17.3673	-1.42857	2.69388	-3.38776	-9.4898	-6.87755	0255	three_four
17	016a6.jpg	watch	curved	No_Shaded	hand	29.6	0	0	1	2	sharp_curved	-7.59184	-1.42857	-17.3673	-1.42857	2.69388	-3.38776	-9.4898	-6.87755	0166	frontal
17	039s1.jpg	coffee maker	sharp	Shaded	hand	79.4	0	1	0	3	curved_sharp	-7.59184	-1.42857	-17.3673	-1.42857	2.69388	-3.38776	-9.4898	-6.87755	0391	frontal
17	001a1.jpg	hat	curved	No_Shaded	computer	52.6	0	0	1	2	sharp_curved	-7.59184	-1.42857	-17.3673	-1.42857	2.69388	-3.38776	-9.4898	-6.87755	0011	three_four
17	034s6.jpg	radio	sharp	Shaded	hand	67.8	0	0	1	2	sharp_curved	-7.59184	-1.42857	-17.3673	-1.42857	2.69388	-3.38776	-9.4898	-6.87755	0346	frontal
17	040a6.jpg	chair	curved	Shaded	hand	80.8	0	0	1	2	curved_sharp	-7.59184	-1.42857	-17.3673	-1.42857	2.69388	-3.38776	-9.4898	-6.87755	0406	three_four
17	010s6.jpg	mirror	sharp	No_Shaded	computer	51.6	0	1	0	3	sharp_curved	-7.59184	-1.42857	-17.3673	-1.42857	2.69388	-3.38776	-9.4898	-6.87755	0106	frontal
17	002a5.jpg	umbrella	curved	No_Shaded	hand	64.2	1	0	0	1	curved_sharp	-7.59184	-1.42857	-17.3673	-1.42857	2.69388	-3.38776	-9.4898	-6.87755	0025	frontal
17	027a2.jpg	electric guitar	curved	No_Shaded	computer	63.2	0	0	1	2	sharp_curved	-7.59184	-1.42857	-17.3673	-1.42857	2.69388	-3.38776	-9.4898	-6.87755	0272	frontal
17	019a4.jpg	duct tape	curved	Shaded	computer	29.8	0	1	0	3	sharp_curved	-7.59184	-1.42857	-17.3673	-1.42857	2.69388	-3.38776	-9.4898	-6.87755	0194	three_four
17	016s6.jpg	watch	sharp	No_Shaded	hand	43.2	0	0	1	2	sharp_curved	-7.59184	-1.42857	-17.3673	-1.42857	2.69388	-3.38776	-9.4898	-6.87755	0166	frontal
17	039a3.jpg	glass	curved	Shaded	hand	73.8	1	0	0	1	curved_sharp	-7.59184	-1.42857	-17.3673	-1.42857	2.69388	-3.38776	-9.4898	-6.87755	0393	frontal
17	025s5.jpg	glasses	sharp	No_Shaded	hand	46	1	0	0	1	curved_sharp	-7.59184	-1.42857	-17.3673	-1.42857	2.69388	-3.38776	-9.4898	-6.87755	0255	three_four
17	049a2.jpg	tv	curved	No_Shaded	hand	48.8	0	0	1	2	sharp_curved	-7.59184	-1.42857	-17.3673	-1.42857	2.69388	-3.38776	-9.4898	-6.87755	0492	frontal
17	049a4.jpg	lamp	curved	No_Shaded	hand	55.2	0	0	1	2	sharp_curved	-7.59184	-1.42857	-17.3673	-1.42857	2.69388	-3.38776	-9.4898	-6.87755	0494	frontal
17	033s6.jpg	teapot	sharp	No_Shaded	hand	23.8	1	0	0	1	sharp_curved	-7.59184	-1.42857	-17.3673	-1.42857	2.69388	-3.38776	-9.4898	-6.87755	0336	frontal
17	010a1.jpg	handbag	curved	No_Shaded	computer	26.4	0	0	1	2	sharp_curved	-7.59184	-1.42857	-17.3673	-1.42857	2.69388	-3.38776	-9.4898	-6.87755	0101	frontal
17	002s3.jpg	lamp	sharp	No_Shaded	hand	69.2	1	0	0	1	curved_sharp	-7.59184	-1.42857	-17.3673	-1.42857	2.69388	-3.38776	-9.4898	-6.87755	0023	three_four
17	027s2.jpg	electric guitar	sharp	No_Shaded	computer	62	0	0	1	2	sharp_curved	-7.59184	-1.42857	-17.3673	-1.42857	2.69388	-3.38776	-9.4898	-6.87755	0272	frontal
17	001s1.jpg	hat	sharp	No_Shaded	computer	66	0	0	1	2	sharp_curved	-7.59184	-1.42857	-17.3673	-1.42857	2.69388	-3.38776	-9.4898	-6.87755	0011	three_four
17	034a1.jpg	jug	curved	Shaded	hand	78.2	1	0	0	1	sharp_curved	-7.59184	-1.42857	-17.3673	-1.42857	2.69388	-3.38776	-9.4898	-6.87755	0341	frontal
17	017s5.jpg	headphones	sharp	No_Shaded	hand	50.2	1	0	0	1	curved_sharp	-7.59184	-1.42857	-17.3673	-1.42857	2.69388	-3.38776	-9.4898	-6.87755	0175	frontal
17	033a6.jpg	teapot	curved	No_Shaded	hand	51.2	1	0	0	1	sharp_curved	-7.59184	-1.42857	-17.3673	-1.42857	2.69388	-3.38776	-9.4898	-6.87755	0336	frontal
17	016s4.jpg	lightbulb	sharp	No_Shaded	hand	46.6	1	0	0	1	sharp_curved	-7.59184	-1.42857	-17.3673	-1.42857	2.69388	-3.38776	-9.4898	-6.87755	0164	frontal
17	021a3.jpg	toaster	curved	No_Shaded	computer	52	0	1	0	3	sharp_curved	-7.59184	-1.42857	-17.3673	-1.42857	2.69388	-3.38776	-9.4898	-6.87755	0213	three_four
17	052s2.jpg	photo frame	sharp	No_Shaded	computer	52.2	0	0	1	2	curved_sharp	-7.59184	-1.42857	-17.3673	-1.42857	2.69388	-3.38776	-9.4898	-6.87755	0522	three_four
17	001s3.jpg	pen	sharp	No_Shaded	computer	62.4	1	0	0	1	curved_sharp	-7.59184	-1.42857	-17.3673	-1.42857	2.69388	-3.38776	-9.4898	-6.87755	0013	three_four
17	012s6.jpg	door	sharp	No_Shaded	hand	58.8	0	1	0	3	sharp_curved	-7.59184	-1.42857	-17.3673	-1.42857	2.69388	-3.38776	-9.4898	-6.87755	0126	frontal
17	040s5.jpg	watch	sharp	Shaded	hand	94.2	0	0	1	2	sharp_curved	-7.59184	-1.42857	-17.3673	-1.42857	2.69388	-3.38776	-9.4898	-6.87755	0405	three_four
17	050a4.jpg	coffee maker	curved	No_Shaded	computer	79.4	0	0	1	2	sharp_curved	-7.59184	-1.42857	-17.3673	-1.42857	2.69388	-3.38776	-9.4898	-6.87755	0504	frontal
17	050a5.jpg	tvmonitor	curved	No_Shaded	computer	52.2	0	0	1	2	curved_sharp	-7.59184	-1.42857	-17.3673	-1.42857	2.69388	-3.38776	-9.4898	-6.87755	0505	frontal
17	010a7.jpg	remote control	curved	No_Shaded	hand	60.8	1	0	0	1	sharp_curved	-7.59184	-1.42857	-17.3673	-1.42857	2.69388	-3.38776	-9.4898	-6.87755	0107	three_four
18	025a4.jpg	handle	curved	No_Shaded	hand	62.6	0	0	1	2	curved_sharp	-6.59184	-1.42857	-5.36735	2.57143	3.69388	-3.38776	1.5102	-5.87755	0254	frontal
18	034a6.jpg	radio	curved	Shaded	hand	88.2	0	0	1	2	curved_sharp	-6.59184	-1.42857	-5.36735	2.57143	3.69388	-3.38776	1.5102	-5.87755	0346	frontal
18	010a3.jpg	glasses	curved	No_Shaded	hand	76	1	0	0	1	sharp_curved	-6.59184	-1.42857	-5.36735	2.57143	3.69388	-3.38776	1.5102	-5.87755	0103	frontal
18	019a5.jpg	tap	curved	Shaded	computer	89.6	0	1	0	3	curved_sharp	-6.59184	-1.42857	-5.36735	2.57143	3.69388	-3.38776	1.5102	-5.87755	0195	three_four
18	050s7.jpg	mobile phone	sharp	No_Shaded	computer	0.4	1	0	0	1	curved_sharp	-6.59184	-1.42857	-5.36735	2.57143	3.69388	-3.38776	1.5102	-5.87755	0507	frontal
18	001s3.jpg	pen	sharp	No_Shaded	computer	62.6	0	0	1	2	sharp_curved	-6.59184	-1.42857	-5.36735	2.57143	3.69388	-3.38776	1.5102	-5.87755	0013	three_four
18	034s6.jpg	radio	sharp	Shaded	hand	92	0	0	1	2	curved_sharp	-6.59184	-1.42857	-5.36735	2.57143	3.69388	-3.38776	1.5102	-5.87755	0346	frontal
18	001a1.jpg	hat	curved	No_Shaded	computer	65.2	0	0	1	2	sharp_curved	-6.59184	-1.42857	-5.36735	2.57143	3.69388	-3.38776	1.5102	-5.87755	0011	three_four
18	019a4.jpg	duct tape	curved	Shaded	computer	18.6	0	1	0	3	sharp_curved	-6.59184	-1.42857	-5.36735	2.57143	3.69388	-3.38776	1.5102	-5.87755	0194	three_four
18	049s2.jpg	tv	sharp	No_Shaded	hand	67.8	0	0	1	2	curved_sharp	-6.59184	-1.42857	-5.36735	2.57143	3.69388	-3.38776	1.5102	-5.87755	0492	frontal
18	049a4.jpg	lamp	curved	No_Shaded	hand	68.2	0	0	1	2	curved_sharp	-6.59184	-1.42857	-5.36735	2.57143	3.69388	-3.38776	1.5102	-5.87755	0494	frontal
18	040s6.jpg	chair	sharp	Shaded	hand	13	1	0	0	1	sharp_curved	-6.59184	-1.42857	-5.36735	2.57143	3.69388	-3.38776	1.5102	-5.87755	0406	three_four
18	040a5.jpg	watch	curved	Shaded	hand	100	0	0	1	2	sharp_curved	-6.59184	-1.42857	-5.36735	2.57143	3.69388	-3.38776	1.5102	-5.87755	0405	three_four
18	008s1.jpg	mirror	sharp	No_Shaded	computer	7.8	0	0	1	2	curved_sharp	-6.59184	-1.42857	-5.36735	2.57143	3.69388	-3.38776	1.5102	-5.87755	0081	three_four
18	022a4.jpg	glass/cup	curved	Shaded	hand	100	0	0	1	2	curved_sharp	-6.59184	-1.42857	-5.36735	2.57143	3.69388	-3.38776	1.5102	-5.87755	0224	frontal
18	052s2.jpg	photo frame	sharp	No_Shaded	computer	46.2	0	0	1	2	sharp_curved	-6.59184	-1.42857	-5.36735	2.57143	3.69388	-3.38776	1.5102	-5.87755	0522	three_four
18	050s5.jpg	tvmonitor	sharp	No_Shaded	computer	39.4	0	0	1	2	sharp_curved	-6.59184	-1.42857	-5.36735	2.57143	3.69388	-3.38776	1.5102	-5.87755	0505	frontal
18	019s5.jpg	tap	sharp	Shaded	computer	88	0	1	0	3	curved_sharp	-6.59184	-1.42857	-5.36735	2.57143	3.69388	-3.38776	1.5102	-5.87755	0195	three_four
18	050s4.jpg	coffee maker	sharp	No_Shaded	computer	72.4	0	0	1	2	sharp_curved	-6.59184	-1.42857	-5.36735	2.57143	3.69388	-3.38776	1.5102	-5.87755	0504	frontal
18	033a6.jpg	teapot	curved	No_Shaded	hand	23	1	0	0	1	curved_sharp	-6.59184	-1.42857	-5.36735	2.57143	3.69388	-3.38776	1.5102	-5.87755	0336	frontal
18	021s4.jpg	remote control	sharp	No_Shaded	computer	61.8	0	0	1	2	curved_sharp	-6.59184	-1.42857	-5.36735	2.57143	3.69388	-3.38776	1.5102	-5.87755	0214	three_four
18	002s5.jpg	umbrella	sharp	No_Shaded	hand	20	1	0	0	1	sharp_curved	-6.59184	-1.42857	-5.36735	2.57143	3.69388	-3.38776	1.5102	-5.87755	0025	frontal
18	017a5.jpg	headphones	curved	No_Shaded	hand	27.8	0	0	1	2	curved_sharp	-6.59184	-1.42857	-5.36735	2.57143	3.69388	-3.38776	1.5102	-5.87755	0175	frontal
18	027a2.jpg	electric guitar	curved	No_Shaded	computer	82.2	0	0	1	2	curved_sharp	-6.59184	-1.42857	-5.36735	2.57143	3.69388	-3.38776	1.5102	-5.87755	0272	frontal
18	049a2.jpg	tv	curved	No_Shaded	hand	79	0	0	1	2	curved_sharp	-6.59184	-1.42857	-5.36735	2.57143	3.69388	-3.38776	1.5102	-5.87755	0492	frontal
18	016s4.jpg	lightbulb	sharp	No_Shaded	hand	28.8	1	0	0	1	sharp_curved	-6.59184	-1.42857	-5.36735	2.57143	3.69388	-3.38776	1.5102	-5.87755	0164	frontal
18	010a4.jpg	clock	curved	No_Shaded	computer	89.2	1	0	0	1	sharp_curved	-6.59184	-1.42857	-5.36735	2.57143	3.69388	-3.38776	1.5102	-5.87755	0104	frontal
18	014s5.jpg	cap	sharp	No_Shaded	hand	60.4	0	0	1	2	curved_sharp	-6.59184	-1.42857	-5.36735	2.57143	3.69388	-3.38776	1.5102	-5.87755	0145	three_four
18	021a3.jpg	toaster	curved	No_Shaded	computer	1	0	1	0	3	curved_sharp	-6.59184	-1.42857	-5.36735	2.57143	3.69388	-3.38776	1.5102	-5.87755	0213	three_four
18	033s6.jpg	teapot	sharp	No_Shaded	hand	0	1	0	0	1	curved_sharp	-6.59184	-1.42857	-5.36735	2.57143	3.69388	-3.38776	1.5102	-5.87755	0336	frontal
18	049a1.jpg	backpack	curved	No_Shaded	hand	76.8	0	0	1	2	curved_sharp	-6.59184	-1.42857	-5.36735	2.57143	3.69388	-3.38776	1.5102	-5.87755	0491	three_four
18	010a6.jpg	mirror	curved	No_Shaded	computer	75	0	0	1	2	sharp_curved	-6.59184	-1.42857	-5.36735	2.57143	3.69388	-3.38776	1.5102	-5.87755	0106	frontal
18	039a3.jpg	glass	curved	Shaded	hand	59.8	0	0	1	2	sharp_curved	-6.59184	-1.42857	-5.36735	2.57143	3.69388	-3.38776	1.5102	-5.87755	0393	frontal
18	017s5.jpg	headphones	sharp	No_Shaded	hand	17	0	0	1	2	curved_sharp	-6.59184	-1.42857	-5.36735	2.57143	3.69388	-3.38776	1.5102	-5.87755	0175	frontal
18	033s3.jpg	toaster	sharp	No_Shaded	hand	24	0	0	1	2	sharp_curved	-6.59184	-1.42857	-5.36735	2.57143	3.69388	-3.38776	1.5102	-5.87755	0333	three_four
18	050a4.jpg	coffee maker	curved	No_Shaded	computer	67.4	0	0	1	2	sharp_curved	-6.59184	-1.42857	-5.36735	2.57143	3.69388	-3.38776	1.5102	-5.87755	0504	frontal
18	002a3.jpg	lamp	curved	No_Shaded	hand	63.8	0	0	1	2	sharp_curved	-6.59184	-1.42857	-5.36735	2.57143	3.69388	-3.38776	1.5102	-5.87755	0023	three_four
18	034a3.jpg	handle	curved	Shaded	hand	24.4	1	0	0	1	sharp_curved	-6.59184	-1.42857	-5.36735	2.57143	3.69388	-3.38776	1.5102	-5.87755	0343	frontal
18	034a4.jpg	sponge	curved	Shaded	hand	0	1	0	0	1	curved_sharp	-6.59184	-1.42857	-5.36735	2.57143	3.69388	-3.38776	1.5102	-5.87755	0344	three_four
18	040s2.jpg	scissors	sharp	Shaded	hand	17.2	1	0	0	1	sharp_curved	-6.59184	-1.42857	-5.36735	2.57143	3.69388	-3.38776	1.5102	-5.87755	0402	three_four
18	019s4.jpg	duct tape	sharp	Shaded	computer	36	0	1	0	3	sharp_curved	-6.59184	-1.42857	-5.36735	2.57143	3.69388	-3.38776	1.5102	-5.87755	0194	three_four
18	049s4.jpg	lamp	sharp	No_Shaded	hand	72	0	0	1	2	curved_sharp	-6.59184	-1.42857	-5.36735	2.57143	3.69388	-3.38776	1.5102	-5.87755	0494	frontal
18	025a6.jpg	comb	curved	No_Shaded	hand	63.6	1	0	0	1	curved_sharp	-6.59184	-1.42857	-5.36735	2.57143	3.69388	-3.38776	1.5102	-5.87755	0256	frontal
18	027s2.jpg	electric guitar	sharp	No_Shaded	computer	66.6	0	0	1	2	curved_sharp	-6.59184	-1.42857	-5.36735	2.57143	3.69388	-3.38776	1.5102	-5.87755	0272	frontal
18	021a4.jpg	remote control	curved	No_Shaded	computer	59.2	0	0	1	2	curved_sharp	-6.59184	-1.42857	-5.36735	2.57143	3.69388	-3.38776	1.5102	-5.87755	0214	three_four
18	025s4.jpg	handle	sharp	No_Shaded	hand	31	0	0	1	2	curved_sharp	-6.59184	-1.42857	-5.36735	2.57143	3.69388	-3.38776	1.5102	-5.87755	0254	frontal
18	010s1.jpg	handbag	sharp	No_Shaded	computer	0	1	0	0	1	sharp_curved	-6.59184	-1.42857	-5.36735	2.57143	3.69388	-3.38776	1.5102	-5.87755	0101	frontal
18	034s1.jpg	jug	sharp	Shaded	hand	0.2	0	0	1	2	sharp_curved	-6.59184	-1.42857	-5.36735	2.57143	3.69388	-3.38776	1.5102	-5.87755	0341	frontal
18	021s3.jpg	toaster	sharp	No_Shaded	computer	0	0	1	0	3	curved_sharp	-6.59184	-1.42857	-5.36735	2.57143	3.69388	-3.38776	1.5102	-5.87755	0213	three_four
18	001a3.jpg	pen	curved	No_Shaded	computer	93.2	0	0	1	2	sharp_curved	-6.59184	-1.42857	-5.36735	2.57143	3.69388	-3.38776	1.5102	-5.87755	0013	three_four
18	039s3.jpg	glass	sharp	Shaded	hand	0.8	0	0	1	2	sharp_curved	-6.59184	-1.42857	-5.36735	2.57143	3.69388	-3.38776	1.5102	-5.87755	0393	frontal
18	010s4.jpg	clock	sharp	No_Shaded	computer	40	1	0	0	1	sharp_curved	-6.59184	-1.42857	-5.36735	2.57143	3.69388	-3.38776	1.5102	-5.87755	0104	frontal
18	040a2.jpg	scissors	curved	Shaded	hand	85.6	1	0	0	1	sharp_curved	-6.59184	-1.42857	-5.36735	2.57143	3.69388	-3.38776	1.5102	-5.87755	0402	three_four
18	040a6.jpg	chair	curved	Shaded	hand	70.2	1	0	0	1	sharp_curved	-6.59184	-1.42857	-5.36735	2.57143	3.69388	-3.38776	1.5102	-5.87755	0406	three_four
18	039s1.jpg	coffee maker	sharp	Shaded	hand	65	0	1	0	3	sharp_curved	-6.59184	-1.42857	-5.36735	2.57143	3.69388	-3.38776	1.5102	-5.87755	0391	frontal
18	040s5.jpg	watch	sharp	Shaded	hand	79.4	0	0	1	2	sharp_curved	-6.59184	-1.42857	-5.36735	2.57143	3.69388	-3.38776	1.5102	-5.87755	0405	three_four
18	022s3.jpg	mobile phone	sharp	Shaded	hand	99.8	1	0	0	1	sharp_curved	-6.59184	-1.42857	-5.36735	2.57143	3.69388	-3.38776	1.5102	-5.87755	0223	three_four
18	025a5.jpg	glasses	curved	No_Shaded	hand	72.8	1	0	0	1	sharp_curved	-6.59184	-1.42857	-5.36735	2.57143	3.69388	-3.38776	1.5102	-5.87755	0255	three_four
18	022s4.jpg	glass/cup	sharp	Shaded	hand	100	0	0	1	2	curved_sharp	-6.59184	-1.42857	-5.36735	2.57143	3.69388	-3.38776	1.5102	-5.87755	0224	frontal
18	049s1.jpg	backpack	sharp	No_Shaded	hand	84.4	0	0	1	2	curved_sharp	-6.59184	-1.42857	-5.36735	2.57143	3.69388	-3.38776	1.5102	-5.87755	0491	three_four
18	016a6.jpg	watch	curved	No_Shaded	hand	51.8	0	0	1	2	sharp_curved	-6.59184	-1.42857	-5.36735	2.57143	3.69388	-3.38776	1.5102	-5.87755	0166	frontal
18	050a5.jpg	tvmonitor	curved	No_Shaded	computer	34.2	0	0	1	2	sharp_curved	-6.59184	-1.42857	-5.36735	2.57143	3.69388	-3.38776	1.5102	-5.87755	0505	frontal
18	001s1.jpg	hat	sharp	No_Shaded	computer	79.6	0	0	1	2	sharp_curved	-6.59184	-1.42857	-5.36735	2.57143	3.69388	-3.38776	1.5102	-5.87755	0011	three_four
18	017a1.jpg	lighter	curved	Shaded	hand	95.2	1	0	0	1	curved_sharp	-6.59184	-1.42857	-5.36735	2.57143	3.69388	-3.38776	1.5102	-5.87755	0171	three_four
18	050a7.jpg	mobile phone	curved	No_Shaded	computer	69.8	1	0	0	1	curved_sharp	-6.59184	-1.42857	-5.36735	2.57143	3.69388	-3.38776	1.5102	-5.87755	0507	frontal
18	010a1.jpg	handbag	curved	No_Shaded	computer	7.2	1	0	0	1	sharp_curved	-6.59184	-1.42857	-5.36735	2.57143	3.69388	-3.38776	1.5102	-5.87755	0101	frontal
18	010s7.jpg	remote control	sharp	No_Shaded	hand	4	0	0	1	2	sharp_curved	-6.59184	-1.42857	-5.36735	2.57143	3.69388	-3.38776	1.5102	-5.87755	0107	three_four
18	010s3.jpg	glasses	sharp	No_Shaded	hand	5	1	0	0	1	sharp_curved	-6.59184	-1.42857	-5.36735	2.57143	3.69388	-3.38776	1.5102	-5.87755	0103	frontal
18	017s1.jpg	lighter	sharp	Shaded	hand	9.6	1	0	0	1	curved_sharp	-6.59184	-1.42857	-5.36735	2.57143	3.69388	-3.38776	1.5102	-5.87755	0171	three_four
18	008a1.jpg	mirror	curved	No_Shaded	computer	38.6	0	0	1	2	curved_sharp	-6.59184	-1.42857	-5.36735	2.57143	3.69388	-3.38776	1.5102	-5.87755	0081	three_four
18	040a7.jpg	pencil sharpener	curved	Shaded	hand	13	0	0	1	2	sharp_curved	-6.59184	-1.42857	-5.36735	2.57143	3.69388	-3.38776	1.5102	-5.87755	0407	three_four
18	022a3.jpg	mobile phone	curved	Shaded	hand	99.2	1	0	0	1	sharp_curved	-6.59184	-1.42857	-5.36735	2.57143	3.69388	-3.38776	1.5102	-5.87755	0223	three_four
18	052a2.jpg	photo frame	curved	No_Shaded	computer	51.6	0	0	1	2	sharp_curved	-6.59184	-1.42857	-5.36735	2.57143	3.69388	-3.38776	1.5102	-5.87755	0522	three_four
18	012s6.jpg	door	sharp	No_Shaded	hand	15.6	0	1	0	3	curved_sharp	-6.59184	-1.42857	-5.36735	2.57143	3.69388	-3.38776	1.5102	-5.87755	0126	frontal
18	034s4.jpg	sponge	sharp	Shaded	hand	0.4	1	0	0	1	curved_sharp	-6.59184	-1.42857	-5.36735	2.57143	3.69388	-3.38776	1.5102	-5.87755	0344	three_four
18	016s6.jpg	watch	sharp	No_Shaded	hand	46.2	0	0	1	2	sharp_curved	-6.59184	-1.42857	-5.36735	2.57143	3.69388	-3.38776	1.5102	-5.87755	0166	frontal
18	025s5.jpg	glasses	sharp	No_Shaded	hand	68.8	1	0	0	1	sharp_curved	-6.59184	-1.42857	-5.36735	2.57143	3.69388	-3.38776	1.5102	-5.87755	0255	three_four
18	039a1.jpg	coffee maker	curved	Shaded	hand	20.8	0	1	0	3	sharp_curved	-6.59184	-1.42857	-5.36735	2.57143	3.69388	-3.38776	1.5102	-5.87755	0391	frontal
18	012a6.jpg	door	curved	No_Shaded	hand	0	0	1	0	3	curved_sharp	-6.59184	-1.42857	-5.36735	2.57143	3.69388	-3.38776	1.5102	-5.87755	0126	frontal
18	025s6.jpg	comb	sharp	No_Shaded	hand	13.8	1	0	0	1	curved_sharp	-6.59184	-1.42857	-5.36735	2.57143	3.69388	-3.38776	1.5102	-5.87755	0256	frontal
18	010s6.jpg	mirror	sharp	No_Shaded	computer	0	0	0	1	2	sharp_curved	-6.59184	-1.42857	-5.36735	2.57143	3.69388	-3.38776	1.5102	-5.87755	0106	frontal
18	034s3.jpg	handle	sharp	Shaded	hand	19.6	1	0	0	1	sharp_curved	-6.59184	-1.42857	-5.36735	2.57143	3.69388	-3.38776	1.5102	-5.87755	0343	frontal
18	002a5.jpg	umbrella	curved	No_Shaded	hand	27.6	1	0	0	1	sharp_curved	-6.59184	-1.42857	-5.36735	2.57143	3.69388	-3.38776	1.5102	-5.87755	0025	frontal
18	040s7.jpg	pencil sharpener	sharp	Shaded	hand	89.6	0	0	1	2	sharp_curved	-6.59184	-1.42857	-5.36735	2.57143	3.69388	-3.38776	1.5102	-5.87755	0407	three_four
18	034a1.jpg	jug	curved	Shaded	hand	66.6	0	0	1	2	sharp_curved	-6.59184	-1.42857	-5.36735	2.57143	3.69388	-3.38776	1.5102	-5.87755	0341	frontal
18	016a4.jpg	lightbulb	curved	No_Shaded	hand	66.6	1	0	0	1	sharp_curved	-6.59184	-1.42857	-5.36735	2.57143	3.69388	-3.38776	1.5102	-5.87755	0164	frontal
18	014a5.jpg	cap	curved	No_Shaded	hand	75	0	0	1	2	curved_sharp	-6.59184	-1.42857	-5.36735	2.57143	3.69388	-3.38776	1.5102	-5.87755	0145	three_four
18	002s3.jpg	lamp	sharp	No_Shaded	hand	35.2	0	0	1	2	sharp_curved	-6.59184	-1.42857	-5.36735	2.57143	3.69388	-3.38776	1.5102	-5.87755	0023	three_four
18	033a3.jpg	toaster	curved	No_Shaded	hand	14	0	0	1	2	sharp_curved	-6.59184	-1.42857	-5.36735	2.57143	3.69388	-3.38776	1.5102	-5.87755	0333	three_four
18	010a7.jpg	remote control	curved	No_Shaded	hand	0.2	0	0	1	2	sharp_curved	-6.59184	-1.42857	-5.36735	2.57143	3.69388	-3.38776	1.5102	-5.87755	0107	three_four
19	034s4.jpg	sponge	sharp	Shaded	hand	35	1	0	0	1	sharp_curved	-4.59184	-0.428571	-4.36735	0.571429	-3.30612	0.612245	-0.489796	2.12245	0344	three_four
19	034s1.jpg	jug	sharp	Shaded	hand	14.8	1	0	0	1	sharp_curved	-4.59184	-0.428571	-4.36735	0.571429	-3.30612	0.612245	-0.489796	2.12245	0341	frontal
19	019s5.jpg	tap	sharp	Shaded	computer	73.8	0	1	0	3	curved_sharp	-4.59184	-0.428571	-4.36735	0.571429	-3.30612	0.612245	-0.489796	2.12245	0195	three_four
19	050a5.jpg	tvmonitor	curved	No_Shaded	computer	49.8	0	1	0	3	sharp_curved	-4.59184	-0.428571	-4.36735	0.571429	-3.30612	0.612245	-0.489796	2.12245	0505	frontal
19	001a1.jpg	hat	curved	No_Shaded	computer	50.4	1	0	0	1	sharp_curved	-4.59184	-0.428571	-4.36735	0.571429	-3.30612	0.612245	-0.489796	2.12245	0011	three_four
19	033a6.jpg	teapot	curved	No_Shaded	hand	18.6	1	0	0	1	curved_sharp	-4.59184	-0.428571	-4.36735	0.571429	-3.30612	0.612245	-0.489796	2.12245	0336	frontal
19	034a1.jpg	jug	curved	Shaded	hand	26.8	1	0	0	1	sharp_curved	-4.59184	-0.428571	-4.36735	0.571429	-3.30612	0.612245	-0.489796	2.12245	0341	frontal
19	050s7.jpg	mobile phone	sharp	No_Shaded	computer	25.8	1	0	0	1	sharp_curved	-4.59184	-0.428571	-4.36735	0.571429	-3.30612	0.612245	-0.489796	2.12245	0507	frontal
19	052s2.jpg	photo frame	sharp	No_Shaded	computer	47.6	1	0	0	1	sharp_curved	-4.59184	-0.428571	-4.36735	0.571429	-3.30612	0.612245	-0.489796	2.12245	0522	three_four
19	021s4.jpg	remote control	sharp	No_Shaded	computer	51.8	0	1	0	3	sharp_curved	-4.59184	-0.428571	-4.36735	0.571429	-3.30612	0.612245	-0.489796	2.12245	0214	three_four
19	010a3.jpg	glasses	curved	No_Shaded	hand	23.6	0	0	1	2	curved_sharp	-4.59184	-0.428571	-4.36735	0.571429	-3.30612	0.612245	-0.489796	2.12245	0103	frontal
19	033s3.jpg	toaster	sharp	No_Shaded	hand	28.6	1	0	0	1	curved_sharp	-4.59184	-0.428571	-4.36735	0.571429	-3.30612	0.612245	-0.489796	2.12245	0333	three_four
19	050a7.jpg	mobile phone	curved	No_Shaded	computer	52.4	1	0	0	1	sharp_curved	-4.59184	-0.428571	-4.36735	0.571429	-3.30612	0.612245	-0.489796	2.12245	0507	frontal
19	039s1.jpg	coffee maker	sharp	Shaded	hand	36.2	1	0	0	1	sharp_curved	-4.59184	-0.428571	-4.36735	0.571429	-3.30612	0.612245	-0.489796	2.12245	0391	frontal
19	017s1.jpg	lighter	sharp	Shaded	hand	59.2	1	0	0	1	sharp_curved	-4.59184	-0.428571	-4.36735	0.571429	-3.30612	0.612245	-0.489796	2.12245	0171	three_four
19	008a1.jpg	mirror	curved	No_Shaded	computer	58	1	0	0	1	curved_sharp	-4.59184	-0.428571	-4.36735	0.571429	-3.30612	0.612245	-0.489796	2.12245	0081	three_four
19	050s4.jpg	coffee maker	sharp	No_Shaded	computer	32	0	1	0	3	sharp_curved	-4.59184	-0.428571	-4.36735	0.571429	-3.30612	0.612245	-0.489796	2.12245	0504	frontal
19	025a5.jpg	glasses	curved	No_Shaded	hand	32.8	0	1	0	3	sharp_curved	-4.59184	-0.428571	-4.36735	0.571429	-3.30612	0.612245	-0.489796	2.12245	0255	three_four
19	040s2.jpg	scissors	sharp	Shaded	hand	18.2	1	0	0	1	curved_sharp	-4.59184	-0.428571	-4.36735	0.571429	-3.30612	0.612245	-0.489796	2.12245	0402	three_four
19	016a4.jpg	lightbulb	curved	No_Shaded	hand	58.2	1	0	0	1	curved_sharp	-4.59184	-0.428571	-4.36735	0.571429	-3.30612	0.612245	-0.489796	2.12245	0164	frontal
19	049a4.jpg	lamp	curved	No_Shaded	hand	51.8	0	0	1	2	sharp_curved	-4.59184	-0.428571	-4.36735	0.571429	-3.30612	0.612245	-0.489796	2.12245	0494	frontal
19	010a4.jpg	clock	curved	No_Shaded	computer	55	1	0	0	1	sharp_curved	-4.59184	-0.428571	-4.36735	0.571429	-3.30612	0.612245	-0.489796	2.12245	0104	frontal
19	034a4.jpg	sponge	curved	Shaded	hand	41	1	0	0	1	sharp_curved	-4.59184	-0.428571	-4.36735	0.571429	-3.30612	0.612245	-0.489796	2.12245	0344	three_four
19	025s4.jpg	handle	sharp	No_Shaded	hand	32.4	1	0	0	1	sharp_curved	-4.59184	-0.428571	-4.36735	0.571429	-3.30612	0.612245	-0.489796	2.12245	0254	frontal
19	019s4.jpg	duct tape	sharp	Shaded	computer	73.6	0	1	0	3	sharp_curved	-4.59184	-0.428571	-4.36735	0.571429	-3.30612	0.612245	-0.489796	2.12245	0194	three_four
19	010a6.jpg	mirror	curved	No_Shaded	computer	45	0	1	0	3	curved_sharp	-4.59184	-0.428571	-4.36735	0.571429	-3.30612	0.612245	-0.489796	2.12245	0106	frontal
19	022s3.jpg	mobile phone	sharp	Shaded	hand	51.8	0	0	1	2	curved_sharp	-4.59184	-0.428571	-4.36735	0.571429	-3.30612	0.612245	-0.489796	2.12245	0223	three_four
19	050a4.jpg	coffee maker	curved	No_Shaded	computer	44.4	0	1	0	3	sharp_curved	-4.59184	-0.428571	-4.36735	0.571429	-3.30612	0.612245	-0.489796	2.12245	0504	frontal
19	050s5.jpg	tvmonitor	sharp	No_Shaded	computer	33.8	0	1	0	3	sharp_curved	-4.59184	-0.428571	-4.36735	0.571429	-3.30612	0.612245	-0.489796	2.12245	0505	frontal
19	025s6.jpg	comb	sharp	No_Shaded	hand	17.8	1	0	0	1	sharp_curved	-4.59184	-0.428571	-4.36735	0.571429	-3.30612	0.612245	-0.489796	2.12245	0256	frontal
19	040s7.jpg	pencil sharpener	sharp	Shaded	hand	48.6	0	0	1	2	sharp_curved	-4.59184	-0.428571	-4.36735	0.571429	-3.30612	0.612245	-0.489796	2.12245	0407	three_four
19	040a2.jpg	scissors	curved	Shaded	hand	41.2	1	0	0	1	curved_sharp	-4.59184	-0.428571	-4.36735	0.571429	-3.30612	0.612245	-0.489796	2.12245	0402	three_four
19	002a3.jpg	lamp	curved	No_Shaded	hand	41.8	1	0	0	1	sharp_curved	-4.59184	-0.428571	-4.36735	0.571429	-3.30612	0.612245	-0.489796	2.12245	0023	three_four
19	010a1.jpg	handbag	curved	No_Shaded	computer	40.8	1	0	0	1	sharp_curved	-4.59184	-0.428571	-4.36735	0.571429	-3.30612	0.612245	-0.489796	2.12245	0101	frontal
19	012s6.jpg	door	sharp	No_Shaded	hand	40	0	0	1	2	curved_sharp	-4.59184	-0.428571	-4.36735	0.571429	-3.30612	0.612245	-0.489796	2.12245	0126	frontal
19	001a3.jpg	pen	curved	No_Shaded	computer	95.8	1	0	0	1	curved_sharp	-4.59184	-0.428571	-4.36735	0.571429	-3.30612	0.612245	-0.489796	2.12245	0013	three_four
19	021a3.jpg	toaster	curved	No_Shaded	computer	72.8	0	1	0	3	sharp_curved	-4.59184	-0.428571	-4.36735	0.571429	-3.30612	0.612245	-0.489796	2.12245	0213	three_four
19	021a4.jpg	remote control	curved	No_Shaded	computer	60.2	0	1	0	3	sharp_curved	-4.59184	-0.428571	-4.36735	0.571429	-3.30612	0.612245	-0.489796	2.12245	0214	three_four
19	017s5.jpg	headphones	sharp	No_Shaded	hand	28.6	1	0	0	1	sharp_curved	-4.59184	-0.428571	-4.36735	0.571429	-3.30612	0.612245	-0.489796	2.12245	0175	frontal
19	014s5.jpg	cap	sharp	No_Shaded	hand	49.8	1	0	0	1	curved_sharp	-4.59184	-0.428571	-4.36735	0.571429	-3.30612	0.612245	-0.489796	2.12245	0145	three_four
19	016s6.jpg	watch	sharp	No_Shaded	hand	29.4	1	0	0	1	sharp_curved	-4.59184	-0.428571	-4.36735	0.571429	-3.30612	0.612245	-0.489796	2.12245	0166	frontal
19	002s3.jpg	lamp	sharp	No_Shaded	hand	28.8	1	0	0	1	sharp_curved	-4.59184	-0.428571	-4.36735	0.571429	-3.30612	0.612245	-0.489796	2.12245	0023	three_four
19	039a1.jpg	coffee maker	curved	Shaded	hand	33	1	0	0	1	sharp_curved	-4.59184	-0.428571	-4.36735	0.571429	-3.30612	0.612245	-0.489796	2.12245	0391	frontal
19	025a6.jpg	comb	curved	No_Shaded	hand	34.6	1	0	0	1	sharp_curved	-4.59184	-0.428571	-4.36735	0.571429	-3.30612	0.612245	-0.489796	2.12245	0256	frontal
19	049s4.jpg	lamp	sharp	No_Shaded	hand	52.2	0	0	1	2	sharp_curved	-4.59184	-0.428571	-4.36735	0.571429	-3.30612	0.612245	-0.489796	2.12245	0494	frontal
19	010s7.jpg	remote control	sharp	No_Shaded	hand	23	1	0	0	1	curved_sharp	-4.59184	-0.428571	-4.36735	0.571429	-3.30612	0.612245	-0.489796	2.12245	0107	three_four
19	001s1.jpg	hat	sharp	No_Shaded	computer	49	1	0	0	1	sharp_curved	-4.59184	-0.428571	-4.36735	0.571429	-3.30612	0.612245	-0.489796	2.12245	0011	three_four
19	002a5.jpg	umbrella	curved	No_Shaded	hand	35	0	1	0	3	sharp_curved	-4.59184	-0.428571	-4.36735	0.571429	-3.30612	0.612245	-0.489796	2.12245	0025	frontal
19	034s6.jpg	radio	sharp	Shaded	hand	52.4	0	0	1	2	curved_sharp	-4.59184	-0.428571	-4.36735	0.571429	-3.30612	0.612245	-0.489796	2.12245	0346	frontal
19	052a2.jpg	photo frame	curved	No_Shaded	computer	49.8	1	0	0	1	sharp_curved	-4.59184	-0.428571	-4.36735	0.571429	-3.30612	0.612245	-0.489796	2.12245	0522	three_four
19	017a1.jpg	lighter	curved	Shaded	hand	71.8	1	0	0	1	sharp_curved	-4.59184	-0.428571	-4.36735	0.571429	-3.30612	0.612245	-0.489796	2.12245	0171	three_four
19	027s2.jpg	electric guitar	sharp	No_Shaded	computer	26.2	0	0	1	2	curved_sharp	-4.59184	-0.428571	-4.36735	0.571429	-3.30612	0.612245	-0.489796	2.12245	0272	frontal
19	019a5.jpg	tap	curved	Shaded	computer	60.6	0	1	0	3	curved_sharp	-4.59184	-0.428571	-4.36735	0.571429	-3.30612	0.612245	-0.489796	2.12245	0195	three_four
19	049a1.jpg	backpack	curved	No_Shaded	hand	51.4	0	0	1	2	curved_sharp	-4.59184	-0.428571	-4.36735	0.571429	-3.30612	0.612245	-0.489796	2.12245	0491	three_four
19	034s3.jpg	handle	sharp	Shaded	hand	21	1	0	0	1	curved_sharp	-4.59184	-0.428571	-4.36735	0.571429	-3.30612	0.612245	-0.489796	2.12245	0343	frontal
19	010s1.jpg	handbag	sharp	No_Shaded	computer	18.2	1	0	0	1	sharp_curved	-4.59184	-0.428571	-4.36735	0.571429	-3.30612	0.612245	-0.489796	2.12245	0101	frontal
19	010a7.jpg	remote control	curved	No_Shaded	hand	43	1	0	0	1	curved_sharp	-4.59184	-0.428571	-4.36735	0.571429	-3.30612	0.612245	-0.489796	2.12245	0107	three_four
19	039s3.jpg	glass	sharp	Shaded	hand	36.4	0	0	1	2	sharp_curved	-4.59184	-0.428571	-4.36735	0.571429	-3.30612	0.612245	-0.489796	2.12245	0393	frontal
19	049a2.jpg	tv	curved	No_Shaded	hand	47.8	0	0	1	2	sharp_curved	-4.59184	-0.428571	-4.36735	0.571429	-3.30612	0.612245	-0.489796	2.12245	0492	frontal
19	040s5.jpg	watch	sharp	Shaded	hand	55.4	1	0	0	1	curved_sharp	-4.59184	-0.428571	-4.36735	0.571429	-3.30612	0.612245	-0.489796	2.12245	0405	three_four
19	049s1.jpg	backpack	sharp	No_Shaded	hand	40.6	0	0	1	2	curved_sharp	-4.59184	-0.428571	-4.36735	0.571429	-3.30612	0.612245	-0.489796	2.12245	0491	three_four
19	025a4.jpg	handle	curved	No_Shaded	hand	40.6	1	0	0	1	sharp_curved	-4.59184	-0.428571	-4.36735	0.571429	-3.30612	0.612245	-0.489796	2.12245	0254	frontal
19	033a3.jpg	toaster	curved	No_Shaded	hand	44	1	0	0	1	curved_sharp	-4.59184	-0.428571	-4.36735	0.571429	-3.30612	0.612245	-0.489796	2.12245	0333	three_four
19	001s3.jpg	pen	sharp	No_Shaded	computer	56.4	1	0	0	1	curved_sharp	-4.59184	-0.428571	-4.36735	0.571429	-3.30612	0.612245	-0.489796	2.12245	0013	three_four
19	025s5.jpg	glasses	sharp	No_Shaded	hand	44.2	0	1	0	3	sharp_curved	-4.59184	-0.428571	-4.36735	0.571429	-3.30612	0.612245	-0.489796	2.12245	0255	three_four
19	034a6.jpg	radio	curved	Shaded	hand	66.6	0	0	1	2	curved_sharp	-4.59184	-0.428571	-4.36735	0.571429	-3.30612	0.612245	-0.489796	2.12245	0346	frontal
19	022a4.jpg	glass/cup	curved	Shaded	hand	96.6	0	0	1	2	sharp_curved	-4.59184	-0.428571	-4.36735	0.571429	-3.30612	0.612245	-0.489796	2.12245	0224	frontal
19	039a3.jpg	glass	curved	Shaded	hand	47.6	0	0	1	2	sharp_curved	-4.59184	-0.428571	-4.36735	0.571429	-3.30612	0.612245	-0.489796	2.12245	0393	frontal
19	049s2.jpg	tv	sharp	No_Shaded	hand	36.8	0	0	1	2	sharp_curved	-4.59184	-0.428571	-4.36735	0.571429	-3.30612	0.612245	-0.489796	2.12245	0492	frontal
19	010s3.jpg	glasses	sharp	No_Shaded	hand	28.2	0	0	1	2	curved_sharp	-4.59184	-0.428571	-4.36735	0.571429	-3.30612	0.612245	-0.489796	2.12245	0103	frontal
19	016s4.jpg	lightbulb	sharp	No_Shaded	hand	27.4	1	0	0	1	curved_sharp	-4.59184	-0.428571	-4.36735	0.571429	-3.30612	0.612245	-0.489796	2.12245	0164	frontal
19	022a3.jpg	mobile phone	curved	Shaded	hand	79	0	0	1	2	curved_sharp	-4.59184	-0.428571	-4.36735	0.571429	-3.30612	0.612245	-0.489796	2.12245	0223	three_four
19	012a6.jpg	door	curved	No_Shaded	hand	52.4	0	0	1	2	curved_sharp	-4.59184	-0.428571	-4.36735	0.571429	-3.30612	0.612245	-0.489796	2.12245	0126	frontal
19	010s4.jpg	clock	sharp	No_Shaded	computer	25.6	1	0	0	1	sharp_curved	-4.59184	-0.428571	-4.36735	0.571429	-3.30612	0.612245	-0.489796	2.12245	0104	frontal
19	002s5.jpg	umbrella	sharp	No_Shaded	hand	17.6	0	1	0	3	sharp_curved	-4.59184	-0.428571	-4.36735	0.571429	-3.30612	0.612245	-0.489796	2.12245	0025	frontal
19	027a2.jpg	electric guitar	curved	No_Shaded	computer	66.6	0	0	1	2	curved_sharp	-4.59184	-0.428571	-4.36735	0.571429	-3.30612	0.612245	-0.489796	2.12245	0272	frontal
19	040s6.jpg	chair	sharp	Shaded	hand	34.4	0	0	1	2	curved_sharp	-4.59184	-0.428571	-4.36735	0.571429	-3.30612	0.612245	-0.489796	2.12245	0406	three_four
19	040a7.jpg	pencil sharpener	curved	Shaded	hand	59.6	0	0	1	2	sharp_curved	-4.59184	-0.428571	-4.36735	0.571429	-3.30612	0.612245	-0.489796	2.12245	0407	three_four
19	034a3.jpg	handle	curved	Shaded	hand	28.2	1	0	0	1	curved_sharp	-4.59184	-0.428571	-4.36735	0.571429	-3.30612	0.612245	-0.489796	2.12245	0343	frontal
19	040a5.jpg	watch	curved	Shaded	hand	57.4	1	0	0	1	curved_sharp	-4.59184	-0.428571	-4.36735	0.571429	-3.30612	0.612245	-0.489796	2.12245	0405	three_four
19	021s3.jpg	toaster	sharp	No_Shaded	computer	20.2	0	1	0	3	sharp_curved	-4.59184	-0.428571	-4.36735	0.571429	-3.30612	0.612245	-0.489796	2.12245	0213	three_four
19	033s6.jpg	teapot	sharp	No_Shaded	hand	13	1	0	0	1	curved_sharp	-4.59184	-0.428571	-4.36735	0.571429	-3.30612	0.612245	-0.489796	2.12245	0336	frontal
19	008s1.jpg	mirror	sharp	No_Shaded	computer	58.2	1	0	0	1	curved_sharp	-4.59184	-0.428571	-4.36735	0.571429	-3.30612	0.612245	-0.489796	2.12245	0081	three_four
19	014a5.jpg	cap	curved	No_Shaded	hand	72	1	0	0	1	curved_sharp	-4.59184	-0.428571	-4.36735	0.571429	-3.30612	0.612245	-0.489796	2.12245	0145	three_four
19	010s6.jpg	mirror	sharp	No_Shaded	computer	28.4	0	1	0	3	curved_sharp	-4.59184	-0.428571	-4.36735	0.571429	-3.30612	0.612245	-0.489796	2.12245	0106	frontal
19	016a6.jpg	watch	curved	No_Shaded	hand	46.2	1	0	0	1	sharp_curved	-4.59184	-0.428571	-4.36735	0.571429	-3.30612	0.612245	-0.489796	2.12245	0166	frontal
19	040a6.jpg	chair	curved	Shaded	hand	51.8	0	0	1	2	curved_sharp	-4.59184	-0.428571	-4.36735	0.571429	-3.30612	0.612245	-0.489796	2.12245	0406	three_four
19	017a5.jpg	headphones	curved	No_Shaded	hand	28	1	0	0	1	sharp_curved	-4.59184	-0.428571	-4.36735	0.571429	-3.30612	0.612245	-0.489796	2.12245	0175	frontal
19	022s4.jpg	glass/cup	sharp	Shaded	hand	88.2	0	0	1	2	sharp_curved	-4.59184	-0.428571	-4.36735	0.571429	-3.30612	0.612245	-0.489796	2.12245	0224	frontal
19	019a4.jpg	duct tape	curved	Shaded	computer	85.4	0	1	0	3	sharp_curved	-4.59184	-0.428571	-4.36735	0.571429	-3.30612	0.612245	-0.489796	2.12245	0194	three_four
2	025s6.jpg	comb	sharp	No_Shaded	hand	0.8	1	0	0	1	curved_sharp	9.40816	0.571429	3.63265	1.57143	-0.306122	-1.38776	3.5102	-3.87755	0256	frontal
2	022s4.jpg	glass/cup	sharp	Shaded	hand	52.4	1	0	0	1	curved_sharp	9.40816	0.571429	3.63265	1.57143	-0.306122	-1.38776	3.5102	-3.87755	0224	frontal
2	040s5.jpg	watch	sharp	Shaded	hand	75.6	0	0	1	2	curved_sharp	9.40816	0.571429	3.63265	1.57143	-0.306122	-1.38776	3.5102	-3.87755	0405	three_four
2	017s5.jpg	headphones	sharp	No_Shaded	hand	12.8	1	0	0	1	curved_sharp	9.40816	0.571429	3.63265	1.57143	-0.306122	-1.38776	3.5102	-3.87755	0175	frontal
2	034a4.jpg	sponge	curved	Shaded	hand	24.2	1	0	0	1	sharp_curved	9.40816	0.571429	3.63265	1.57143	-0.306122	-1.38776	3.5102	-3.87755	0344	three_four
2	039a3.jpg	glass	curved	Shaded	hand	70	1	0	0	1	curved_sharp	9.40816	0.571429	3.63265	1.57143	-0.306122	-1.38776	3.5102	-3.87755	0393	frontal
2	034s6.jpg	radio	sharp	Shaded	hand	31	0	1	0	3	sharp_curved	9.40816	0.571429	3.63265	1.57143	-0.306122	-1.38776	3.5102	-3.87755	0346	frontal
2	010a6.jpg	mirror	curved	No_Shaded	computer	16	0	1	0	3	sharp_curved	9.40816	0.571429	3.63265	1.57143	-0.306122	-1.38776	3.5102	-3.87755	0106	frontal
2	050s5.jpg	tvmonitor	sharp	No_Shaded	computer	6.2	1	0	0	1	sharp_curved	9.40816	0.571429	3.63265	1.57143	-0.306122	-1.38776	3.5102	-3.87755	0505	frontal
2	021s3.jpg	toaster	sharp	No_Shaded	computer	1	0	1	0	3	curved_sharp	9.40816	0.571429	3.63265	1.57143	-0.306122	-1.38776	3.5102	-3.87755	0213	three_four
2	027a2.jpg	electric guitar	curved	No_Shaded	computer	17	0	0	1	2	curved_sharp	9.40816	0.571429	3.63265	1.57143	-0.306122	-1.38776	3.5102	-3.87755	0272	frontal
2	017a5.jpg	headphones	curved	No_Shaded	hand	29.6	1	0	0	1	curved_sharp	9.40816	0.571429	3.63265	1.57143	-0.306122	-1.38776	3.5102	-3.87755	0175	frontal
2	049s4.jpg	lamp	sharp	No_Shaded	hand	52	0	1	0	3	sharp_curved	9.40816	0.571429	3.63265	1.57143	-0.306122	-1.38776	3.5102	-3.87755	0494	frontal
2	052a2.jpg	photo frame	curved	No_Shaded	computer	31	0	0	1	2	curved_sharp	9.40816	0.571429	3.63265	1.57143	-0.306122	-1.38776	3.5102	-3.87755	0522	three_four
2	040s6.jpg	chair	sharp	Shaded	hand	50	1	0	0	1	curved_sharp	9.40816	0.571429	3.63265	1.57143	-0.306122	-1.38776	3.5102	-3.87755	0406	three_four
2	010s1.jpg	handbag	sharp	No_Shaded	computer	1.4	1	0	0	1	curved_sharp	9.40816	0.571429	3.63265	1.57143	-0.306122	-1.38776	3.5102	-3.87755	0101	frontal
2	034s3.jpg	handle	sharp	Shaded	hand	43.2	0	1	0	3	curved_sharp	9.40816	0.571429	3.63265	1.57143	-0.306122	-1.38776	3.5102	-3.87755	0343	frontal
2	016a4.jpg	lightbulb	curved	No_Shaded	hand	74.8	1	0	0	1	curved_sharp	9.40816	0.571429	3.63265	1.57143	-0.306122	-1.38776	3.5102	-3.87755	0164	frontal
2	050s7.jpg	mobile phone	sharp	No_Shaded	computer	14.2	1	0	0	1	sharp_curved	9.40816	0.571429	3.63265	1.57143	-0.306122	-1.38776	3.5102	-3.87755	0507	frontal
2	034s4.jpg	sponge	sharp	Shaded	hand	32.4	1	0	0	1	sharp_curved	9.40816	0.571429	3.63265	1.57143	-0.306122	-1.38776	3.5102	-3.87755	0344	three_four
2	025a6.jpg	comb	curved	No_Shaded	hand	35.8	1	0	0	1	curved_sharp	9.40816	0.571429	3.63265	1.57143	-0.306122	-1.38776	3.5102	-3.87755	0256	frontal
2	039s3.jpg	glass	sharp	Shaded	hand	89.4	1	0	0	1	curved_sharp	9.40816	0.571429	3.63265	1.57143	-0.306122	-1.38776	3.5102	-3.87755	0393	frontal
2	022a4.jpg	glass/cup	curved	Shaded	hand	68.8	1	0	0	1	curved_sharp	9.40816	0.571429	3.63265	1.57143	-0.306122	-1.38776	3.5102	-3.87755	0224	frontal
2	017a1.jpg	lighter	curved	Shaded	hand	91.8	1	0	0	1	sharp_curved	9.40816	0.571429	3.63265	1.57143	-0.306122	-1.38776	3.5102	-3.87755	0171	three_four
2	034s1.jpg	jug	sharp	Shaded	hand	23.8	0	1	0	3	sharp_curved	9.40816	0.571429	3.63265	1.57143	-0.306122	-1.38776	3.5102	-3.87755	0341	frontal
2	022s3.jpg	mobile phone	sharp	Shaded	hand	98.6	1	0	0	1	curved_sharp	9.40816	0.571429	3.63265	1.57143	-0.306122	-1.38776	3.5102	-3.87755	0223	three_four
2	012a6.jpg	door	curved	No_Shaded	hand	17.2	0	1	0	3	curved_sharp	9.40816	0.571429	3.63265	1.57143	-0.306122	-1.38776	3.5102	-3.87755	0126	frontal
2	040a6.jpg	chair	curved	Shaded	hand	66.8	1	0	0	1	curved_sharp	9.40816	0.571429	3.63265	1.57143	-0.306122	-1.38776	3.5102	-3.87755	0406	three_four
2	014s5.jpg	cap	sharp	No_Shaded	hand	15.8	0	1	0	3	sharp_curved	9.40816	0.571429	3.63265	1.57143	-0.306122	-1.38776	3.5102	-3.87755	0145	three_four
2	016s6.jpg	watch	sharp	No_Shaded	hand	2.8	1	0	0	1	sharp_curved	9.40816	0.571429	3.63265	1.57143	-0.306122	-1.38776	3.5102	-3.87755	0166	frontal
2	040s7.jpg	pencil sharpener	sharp	Shaded	hand	85.8	0	0	1	2	sharp_curved	9.40816	0.571429	3.63265	1.57143	-0.306122	-1.38776	3.5102	-3.87755	0407	three_four
2	027s2.jpg	electric guitar	sharp	No_Shaded	computer	9	0	0	1	2	curved_sharp	9.40816	0.571429	3.63265	1.57143	-0.306122	-1.38776	3.5102	-3.87755	0272	frontal
2	025a5.jpg	glasses	curved	No_Shaded	hand	5.6	1	0	0	1	curved_sharp	9.40816	0.571429	3.63265	1.57143	-0.306122	-1.38776	3.5102	-3.87755	0255	three_four
2	033s6.jpg	teapot	sharp	No_Shaded	hand	0.8	1	0	0	1	curved_sharp	9.40816	0.571429	3.63265	1.57143	-0.306122	-1.38776	3.5102	-3.87755	0336	frontal
2	050a4.jpg	coffee maker	curved	No_Shaded	computer	0.8	0	0	1	2	curved_sharp	9.40816	0.571429	3.63265	1.57143	-0.306122	-1.38776	3.5102	-3.87755	0504	frontal
2	017s1.jpg	lighter	sharp	Shaded	hand	69.8	1	0	0	1	sharp_curved	9.40816	0.571429	3.63265	1.57143	-0.306122	-1.38776	3.5102	-3.87755	0171	three_four
2	016a6.jpg	watch	curved	No_Shaded	hand	27.8	1	0	0	1	sharp_curved	9.40816	0.571429	3.63265	1.57143	-0.306122	-1.38776	3.5102	-3.87755	0166	frontal
2	049s2.jpg	tv	sharp	No_Shaded	hand	53.6	0	1	0	3	sharp_curved	9.40816	0.571429	3.63265	1.57143	-0.306122	-1.38776	3.5102	-3.87755	0492	frontal
2	019a4.jpg	duct tape	curved	Shaded	computer	92.8	0	1	0	3	curved_sharp	9.40816	0.571429	3.63265	1.57143	-0.306122	-1.38776	3.5102	-3.87755	0194	three_four
2	010s4.jpg	clock	sharp	No_Shaded	computer	20.4	1	0	0	1	sharp_curved	9.40816	0.571429	3.63265	1.57143	-0.306122	-1.38776	3.5102	-3.87755	0104	frontal
2	033a6.jpg	teapot	curved	No_Shaded	hand	5.4	1	0	0	1	curved_sharp	9.40816	0.571429	3.63265	1.57143	-0.306122	-1.38776	3.5102	-3.87755	0336	frontal
2	049a4.jpg	lamp	curved	No_Shaded	hand	85	0	1	0	3	sharp_curved	9.40816	0.571429	3.63265	1.57143	-0.306122	-1.38776	3.5102	-3.87755	0494	frontal
2	008a1.jpg	mirror	curved	No_Shaded	computer	85.8	0	0	1	2	sharp_curved	9.40816	0.571429	3.63265	1.57143	-0.306122	-1.38776	3.5102	-3.87755	0081	three_four
2	001s3.jpg	pen	sharp	No_Shaded	computer	62.8	1	0	0	1	curved_sharp	9.40816	0.571429	3.63265	1.57143	-0.306122	-1.38776	3.5102	-3.87755	0013	three_four
2	010s7.jpg	remote control	sharp	No_Shaded	hand	5.8	1	0	0	1	sharp_curved	9.40816	0.571429	3.63265	1.57143	-0.306122	-1.38776	3.5102	-3.87755	0107	three_four
2	050s4.jpg	coffee maker	sharp	No_Shaded	computer	31.2	0	0	1	2	curved_sharp	9.40816	0.571429	3.63265	1.57143	-0.306122	-1.38776	3.5102	-3.87755	0504	frontal
2	034a6.jpg	radio	curved	Shaded	hand	96.2	0	1	0	3	sharp_curved	9.40816	0.571429	3.63265	1.57143	-0.306122	-1.38776	3.5102	-3.87755	0346	frontal
2	040a2.jpg	scissors	curved	Shaded	hand	94.4	1	0	0	1	curved_sharp	9.40816	0.571429	3.63265	1.57143	-0.306122	-1.38776	3.5102	-3.87755	0402	three_four
2	052s2.jpg	photo frame	sharp	No_Shaded	computer	17.8	0	0	1	2	curved_sharp	9.40816	0.571429	3.63265	1.57143	-0.306122	-1.38776	3.5102	-3.87755	0522	three_four
2	001a1.jpg	hat	curved	No_Shaded	computer	4.6	0	1	0	3	sharp_curved	9.40816	0.571429	3.63265	1.57143	-0.306122	-1.38776	3.5102	-3.87755	0011	three_four
2	049a2.jpg	tv	curved	No_Shaded	hand	8.4	0	1	0	3	sharp_curved	9.40816	0.571429	3.63265	1.57143	-0.306122	-1.38776	3.5102	-3.87755	0492	frontal
2	002s3.jpg	lamp	sharp	No_Shaded	hand	1.4	1	0	0	1	curved_sharp	9.40816	0.571429	3.63265	1.57143	-0.306122	-1.38776	3.5102	-3.87755	0023	three_four
2	010s3.jpg	glasses	sharp	No_Shaded	hand	0.6	1	0	0	1	curved_sharp	9.40816	0.571429	3.63265	1.57143	-0.306122	-1.38776	3.5102	-3.87755	0103	frontal
2	022a3.jpg	mobile phone	curved	Shaded	hand	98	1	0	0	1	curved_sharp	9.40816	0.571429	3.63265	1.57143	-0.306122	-1.38776	3.5102	-3.87755	0223	three_four
2	010a1.jpg	handbag	curved	No_Shaded	computer	2.4	1	0	0	1	curved_sharp	9.40816	0.571429	3.63265	1.57143	-0.306122	-1.38776	3.5102	-3.87755	0101	frontal
2	021a3.jpg	toaster	curved	No_Shaded	computer	9.6	0	1	0	3	curved_sharp	9.40816	0.571429	3.63265	1.57143	-0.306122	-1.38776	3.5102	-3.87755	0213	three_four
2	012s6.jpg	door	sharp	No_Shaded	hand	17.2	0	1	0	3	curved_sharp	9.40816	0.571429	3.63265	1.57143	-0.306122	-1.38776	3.5102	-3.87755	0126	frontal
2	049s1.jpg	backpack	sharp	No_Shaded	hand	73.8	1	0	0	1	curved_sharp	9.40816	0.571429	3.63265	1.57143	-0.306122	-1.38776	3.5102	-3.87755	0491	three_four
2	050a5.jpg	tvmonitor	curved	No_Shaded	computer	8.6	1	0	0	1	sharp_curved	9.40816	0.571429	3.63265	1.57143	-0.306122	-1.38776	3.5102	-3.87755	0505	frontal
2	039a1.jpg	coffee maker	curved	Shaded	hand	91.2	0	1	0	3	sharp_curved	9.40816	0.571429	3.63265	1.57143	-0.306122	-1.38776	3.5102	-3.87755	0391	frontal
2	021s4.jpg	remote control	sharp	No_Shaded	computer	21	0	1	0	3	sharp_curved	9.40816	0.571429	3.63265	1.57143	-0.306122	-1.38776	3.5102	-3.87755	0214	three_four
2	019s5.jpg	tap	sharp	Shaded	computer	86.4	1	0	0	1	sharp_curved	9.40816	0.571429	3.63265	1.57143	-0.306122	-1.38776	3.5102	-3.87755	0195	three_four
2	010a3.jpg	glasses	curved	No_Shaded	hand	81.8	1	0	0	1	curved_sharp	9.40816	0.571429	3.63265	1.57143	-0.306122	-1.38776	3.5102	-3.87755	0103	frontal
2	040a5.jpg	watch	curved	Shaded	hand	95.8	0	0	1	2	curved_sharp	9.40816	0.571429	3.63265	1.57143	-0.306122	-1.38776	3.5102	-3.87755	0405	three_four
2	040s2.jpg	scissors	sharp	Shaded	hand	67.8	1	0	0	1	curved_sharp	9.40816	0.571429	3.63265	1.57143	-0.306122	-1.38776	3.5102	-3.87755	0402	three_four
2	034a3.jpg	handle	curved	Shaded	hand	9.8	0	1	0	3	curved_sharp	9.40816	0.571429	3.63265	1.57143	-0.306122	-1.38776	3.5102	-3.87755	0343	frontal
2	019s4.jpg	duct tape	sharp	Shaded	computer	90.6	0	1	0	3	curved_sharp	9.40816	0.571429	3.63265	1.57143	-0.306122	-1.38776	3.5102	-3.87755	0194	three_four
2	039s1.jpg	coffee maker	sharp	Shaded	hand	94	0	1	0	3	sharp_curved	9.40816	0.571429	3.63265	1.57143	-0.306122	-1.38776	3.5102	-3.87755	0391	frontal
2	001s1.jpg	hat	sharp	No_Shaded	computer	15.2	0	1	0	3	sharp_curved	9.40816	0.571429	3.63265	1.57143	-0.306122	-1.38776	3.5102	-3.87755	0011	three_four
2	025a4.jpg	handle	curved	No_Shaded	hand	32.2	0	0	1	2	sharp_curved	9.40816	0.571429	3.63265	1.57143	-0.306122	-1.38776	3.5102	-3.87755	0254	frontal
2	001a3.jpg	pen	curved	No_Shaded	computer	60.2	1	0	0	1	curved_sharp	9.40816	0.571429	3.63265	1.57143	-0.306122	-1.38776	3.5102	-3.87755	0013	three_four
2	002s5.jpg	umbrella	sharp	No_Shaded	hand	21.8	1	0	0	1	curved_sharp	9.40816	0.571429	3.63265	1.57143	-0.306122	-1.38776	3.5102	-3.87755	0025	frontal
2	021a4.jpg	remote control	curved	No_Shaded	computer	15.8	0	1	0	3	sharp_curved	9.40816	0.571429	3.63265	1.57143	-0.306122	-1.38776	3.5102	-3.87755	0214	three_four
2	033s3.jpg	toaster	sharp	No_Shaded	hand	15.2	1	0	0	1	sharp_curved	9.40816	0.571429	3.63265	1.57143	-0.306122	-1.38776	3.5102	-3.87755	0333	three_four
2	049a1.jpg	backpack	curved	No_Shaded	hand	70	1	0	0	1	curved_sharp	9.40816	0.571429	3.63265	1.57143	-0.306122	-1.38776	3.5102	-3.87755	0491	three_four
2	019a5.jpg	tap	curved	Shaded	computer	42.8	1	0	0	1	sharp_curved	9.40816	0.571429	3.63265	1.57143	-0.306122	-1.38776	3.5102	-3.87755	0195	three_four
2	010s6.jpg	mirror	sharp	No_Shaded	computer	9	0	1	0	3	sharp_curved	9.40816	0.571429	3.63265	1.57143	-0.306122	-1.38776	3.5102	-3.87755	0106	frontal
2	014a5.jpg	cap	curved	No_Shaded	hand	82.2	0	1	0	3	sharp_curved	9.40816	0.571429	3.63265	1.57143	-0.306122	-1.38776	3.5102	-3.87755	0145	three_four
2	033a3.jpg	toaster	curved	No_Shaded	hand	18.8	1	0	0	1	sharp_curved	9.40816	0.571429	3.63265	1.57143	-0.306122	-1.38776	3.5102	-3.87755	0333	three_four
2	040a7.jpg	pencil sharpener	curved	Shaded	hand	86.6	0	0	1	2	sharp_curved	9.40816	0.571429	3.63265	1.57143	-0.306122	-1.38776	3.5102	-3.87755	0407	three_four
2	002a3.jpg	lamp	curved	No_Shaded	hand	32.4	1	0	0	1	curved_sharp	9.40816	0.571429	3.63265	1.57143	-0.306122	-1.38776	3.5102	-3.87755	0023	three_four
2	025s4.jpg	handle	sharp	No_Shaded	hand	49	0	0	1	2	sharp_curved	9.40816	0.571429	3.63265	1.57143	-0.306122	-1.38776	3.5102	-3.87755	0254	frontal
2	002a5.jpg	umbrella	curved	No_Shaded	hand	8.8	1	0	0	1	curved_sharp	9.40816	0.571429	3.63265	1.57143	-0.306122	-1.38776	3.5102	-3.87755	0025	frontal
2	050a7.jpg	mobile phone	curved	No_Shaded	computer	5.4	1	0	0	1	sharp_curved	9.40816	0.571429	3.63265	1.57143	-0.306122	-1.38776	3.5102	-3.87755	0507	frontal
2	025s5.jpg	glasses	sharp	No_Shaded	hand	0.4	1	0	0	1	curved_sharp	9.40816	0.571429	3.63265	1.57143	-0.306122	-1.38776	3.5102	-3.87755	0255	three_four
2	010a4.jpg	clock	curved	No_Shaded	computer	1.8	1	0	0	1	sharp_curved	9.40816	0.571429	3.63265	1.57143	-0.306122	-1.38776	3.5102	-3.87755	0104	frontal
2	016s4.jpg	lightbulb	sharp	No_Shaded	hand	77.4	1	0	0	1	curved_sharp	9.40816	0.571429	3.63265	1.57143	-0.306122	-1.38776	3.5102	-3.87755	0164	frontal
2	008s1.jpg	mirror	sharp	No_Shaded	computer	7.6	0	0	1	2	sharp_curved	9.40816	0.571429	3.63265	1.57143	-0.306122	-1.38776	3.5102	-3.87755	0081	three_four
2	034a1.jpg	jug	curved	Shaded	hand	94.4	0	1	0	3	sharp_curved	9.40816	0.571429	3.63265	1.57143	-0.306122	-1.38776	3.5102	-3.87755	0341	frontal
2	010a7.jpg	remote control	curved	No_Shaded	hand	22	1	0	0	1	sharp_curved	9.40816	0.571429	3.63265	1.57143	-0.306122	-1.38776	3.5102	-3.87755	0107	three_four
20	010s7.jpg	remote control	sharp	No_Shaded	hand	32.8	0	1	0	3	sharp_curved	-5.59184	-0.428571	-3.36735	-3.42857	-1.30612	0.612245	-0.489796	-4.87755	0107	three_four
20	008s1.jpg	mirror	sharp	No_Shaded	computer	79.8	1	0	0	1	curved_sharp	-5.59184	-0.428571	-3.36735	-3.42857	-1.30612	0.612245	-0.489796	-4.87755	0081	three_four
20	040a7.jpg	pencil sharpener	curved	Shaded	hand	40.8	0	1	0	3	curved_sharp	-5.59184	-0.428571	-3.36735	-3.42857	-1.30612	0.612245	-0.489796	-4.87755	0407	three_four
20	010s6.jpg	mirror	sharp	No_Shaded	computer	30.4	1	0	0	1	sharp_curved	-5.59184	-0.428571	-3.36735	-3.42857	-1.30612	0.612245	-0.489796	-4.87755	0106	frontal
20	017a5.jpg	headphones	curved	No_Shaded	hand	11.6	1	0	0	1	sharp_curved	-5.59184	-0.428571	-3.36735	-3.42857	-1.30612	0.612245	-0.489796	-4.87755	0175	frontal
20	034a1.jpg	jug	curved	Shaded	hand	17	1	0	0	1	sharp_curved	-5.59184	-0.428571	-3.36735	-3.42857	-1.30612	0.612245	-0.489796	-4.87755	0341	frontal
20	012a6.jpg	door	curved	No_Shaded	hand	10.2	0	1	0	3	sharp_curved	-5.59184	-0.428571	-3.36735	-3.42857	-1.30612	0.612245	-0.489796	-4.87755	0126	frontal
20	034s3.jpg	handle	sharp	Shaded	hand	5.6	1	0	0	1	sharp_curved	-5.59184	-0.428571	-3.36735	-3.42857	-1.30612	0.612245	-0.489796	-4.87755	0343	frontal
20	050a5.jpg	tvmonitor	curved	No_Shaded	computer	40.6	0	1	0	3	curved_sharp	-5.59184	-0.428571	-3.36735	-3.42857	-1.30612	0.612245	-0.489796	-4.87755	0505	frontal
20	033s3.jpg	toaster	sharp	No_Shaded	hand	24.8	0	1	0	3	curved_sharp	-5.59184	-0.428571	-3.36735	-3.42857	-1.30612	0.612245	-0.489796	-4.87755	0333	three_four
20	001a1.jpg	hat	curved	No_Shaded	computer	47.6	1	0	0	1	sharp_curved	-5.59184	-0.428571	-3.36735	-3.42857	-1.30612	0.612245	-0.489796	-4.87755	0011	three_four
20	025a6.jpg	comb	curved	No_Shaded	hand	36.8	1	0	0	1	sharp_curved	-5.59184	-0.428571	-3.36735	-3.42857	-1.30612	0.612245	-0.489796	-4.87755	0256	frontal
20	027s2.jpg	electric guitar	sharp	No_Shaded	computer	22.6	1	0	0	1	sharp_curved	-5.59184	-0.428571	-3.36735	-3.42857	-1.30612	0.612245	-0.489796	-4.87755	0272	frontal
20	034a4.jpg	sponge	curved	Shaded	hand	35	1	0	0	1	curved_sharp	-5.59184	-0.428571	-3.36735	-3.42857	-1.30612	0.612245	-0.489796	-4.87755	0344	three_four
20	040s7.jpg	pencil sharpener	sharp	Shaded	hand	69.6	0	1	0	3	curved_sharp	-5.59184	-0.428571	-3.36735	-3.42857	-1.30612	0.612245	-0.489796	-4.87755	0407	three_four
20	010s3.jpg	glasses	sharp	No_Shaded	hand	31.2	1	0	0	1	sharp_curved	-5.59184	-0.428571	-3.36735	-3.42857	-1.30612	0.612245	-0.489796	-4.87755	0103	frontal
20	034s1.jpg	jug	sharp	Shaded	hand	23.6	1	0	0	1	sharp_curved	-5.59184	-0.428571	-3.36735	-3.42857	-1.30612	0.612245	-0.489796	-4.87755	0341	frontal
20	049s1.jpg	backpack	sharp	No_Shaded	hand	35	1	0	0	1	sharp_curved	-5.59184	-0.428571	-3.36735	-3.42857	-1.30612	0.612245	-0.489796	-4.87755	0491	three_four
20	052a2.jpg	photo frame	curved	No_Shaded	computer	48.6	0	1	0	3	sharp_curved	-5.59184	-0.428571	-3.36735	-3.42857	-1.30612	0.612245	-0.489796	-4.87755	0522	three_four
20	014a5.jpg	cap	curved	No_Shaded	hand	52	1	0	0	1	sharp_curved	-5.59184	-0.428571	-3.36735	-3.42857	-1.30612	0.612245	-0.489796	-4.87755	0145	three_four
20	049s2.jpg	tv	sharp	No_Shaded	hand	57	1	0	0	1	sharp_curved	-5.59184	-0.428571	-3.36735	-3.42857	-1.30612	0.612245	-0.489796	-4.87755	0492	frontal
20	010s4.jpg	clock	sharp	No_Shaded	computer	39.6	1	0	0	1	curved_sharp	-5.59184	-0.428571	-3.36735	-3.42857	-1.30612	0.612245	-0.489796	-4.87755	0104	frontal
20	027a2.jpg	electric guitar	curved	No_Shaded	computer	67.6	1	0	0	1	sharp_curved	-5.59184	-0.428571	-3.36735	-3.42857	-1.30612	0.612245	-0.489796	-4.87755	0272	frontal
20	010a7.jpg	remote control	curved	No_Shaded	hand	41	0	1	0	3	sharp_curved	-5.59184	-0.428571	-3.36735	-3.42857	-1.30612	0.612245	-0.489796	-4.87755	0107	three_four
20	049a4.jpg	lamp	curved	No_Shaded	hand	88.8	1	0	0	1	sharp_curved	-5.59184	-0.428571	-3.36735	-3.42857	-1.30612	0.612245	-0.489796	-4.87755	0494	frontal
20	034a6.jpg	radio	curved	Shaded	hand	37.6	1	0	0	1	sharp_curved	-5.59184	-0.428571	-3.36735	-3.42857	-1.30612	0.612245	-0.489796	-4.87755	0346	frontal
20	052s2.jpg	photo frame	sharp	No_Shaded	computer	70	0	1	0	3	sharp_curved	-5.59184	-0.428571	-3.36735	-3.42857	-1.30612	0.612245	-0.489796	-4.87755	0522	three_four
20	033s6.jpg	teapot	sharp	No_Shaded	hand	8.8	1	0	0	1	curved_sharp	-5.59184	-0.428571	-3.36735	-3.42857	-1.30612	0.612245	-0.489796	-4.87755	0336	frontal
20	002s5.jpg	umbrella	sharp	No_Shaded	hand	14.8	1	0	0	1	curved_sharp	-5.59184	-0.428571	-3.36735	-3.42857	-1.30612	0.612245	-0.489796	-4.87755	0025	frontal
20	001s1.jpg	hat	sharp	No_Shaded	computer	29.8	1	0	0	1	sharp_curved	-5.59184	-0.428571	-3.36735	-3.42857	-1.30612	0.612245	-0.489796	-4.87755	0011	three_four
20	022a4.jpg	glass/cup	curved	Shaded	hand	91.4	1	0	0	1	curved_sharp	-5.59184	-0.428571	-3.36735	-3.42857	-1.30612	0.612245	-0.489796	-4.87755	0224	frontal
20	019a5.jpg	tap	curved	Shaded	computer	54.6	1	0	0	1	curved_sharp	-5.59184	-0.428571	-3.36735	-3.42857	-1.30612	0.612245	-0.489796	-4.87755	0195	three_four
20	021a4.jpg	remote control	curved	No_Shaded	computer	80.6	0	1	0	3	sharp_curved	-5.59184	-0.428571	-3.36735	-3.42857	-1.30612	0.612245	-0.489796	-4.87755	0214	three_four
20	021s3.jpg	toaster	sharp	No_Shaded	computer	29.8	0	1	0	3	sharp_curved	-5.59184	-0.428571	-3.36735	-3.42857	-1.30612	0.612245	-0.489796	-4.87755	0213	three_four
20	017a1.jpg	lighter	curved	Shaded	hand	64.2	1	0	0	1	curved_sharp	-5.59184	-0.428571	-3.36735	-3.42857	-1.30612	0.612245	-0.489796	-4.87755	0171	three_four
20	034a3.jpg	handle	curved	Shaded	hand	31.2	1	0	0	1	sharp_curved	-5.59184	-0.428571	-3.36735	-3.42857	-1.30612	0.612245	-0.489796	-4.87755	0343	frontal
20	050s7.jpg	mobile phone	sharp	No_Shaded	computer	37	1	0	0	1	curved_sharp	-5.59184	-0.428571	-3.36735	-3.42857	-1.30612	0.612245	-0.489796	-4.87755	0507	frontal
20	014s5.jpg	cap	sharp	No_Shaded	hand	39	1	0	0	1	sharp_curved	-5.59184	-0.428571	-3.36735	-3.42857	-1.30612	0.612245	-0.489796	-4.87755	0145	three_four
20	040a2.jpg	scissors	curved	Shaded	hand	51.4	1	0	0	1	curved_sharp	-5.59184	-0.428571	-3.36735	-3.42857	-1.30612	0.612245	-0.489796	-4.87755	0402	three_four
20	025a4.jpg	handle	curved	No_Shaded	hand	24.2	1	0	0	1	curved_sharp	-5.59184	-0.428571	-3.36735	-3.42857	-1.30612	0.612245	-0.489796	-4.87755	0254	frontal
20	012s6.jpg	door	sharp	No_Shaded	hand	26.2	0	1	0	3	sharp_curved	-5.59184	-0.428571	-3.36735	-3.42857	-1.30612	0.612245	-0.489796	-4.87755	0126	frontal
20	040s5.jpg	watch	sharp	Shaded	hand	37.4	0	1	0	3	curved_sharp	-5.59184	-0.428571	-3.36735	-3.42857	-1.30612	0.612245	-0.489796	-4.87755	0405	three_four
20	039s1.jpg	coffee maker	sharp	Shaded	hand	28	0	1	0	3	sharp_curved	-5.59184	-0.428571	-3.36735	-3.42857	-1.30612	0.612245	-0.489796	-4.87755	0391	frontal
20	049a2.jpg	tv	curved	No_Shaded	hand	25.8	1	0	0	1	sharp_curved	-5.59184	-0.428571	-3.36735	-3.42857	-1.30612	0.612245	-0.489796	-4.87755	0492	frontal
20	039s3.jpg	glass	sharp	Shaded	hand	24.4	1	0	0	1	sharp_curved	-5.59184	-0.428571	-3.36735	-3.42857	-1.30612	0.612245	-0.489796	-4.87755	0393	frontal
20	017s1.jpg	lighter	sharp	Shaded	hand	43.6	1	0	0	1	curved_sharp	-5.59184	-0.428571	-3.36735	-3.42857	-1.30612	0.612245	-0.489796	-4.87755	0171	three_four
20	021s4.jpg	remote control	sharp	No_Shaded	computer	59.4	0	1	0	3	sharp_curved	-5.59184	-0.428571	-3.36735	-3.42857	-1.30612	0.612245	-0.489796	-4.87755	0214	three_four
20	050s5.jpg	tvmonitor	sharp	No_Shaded	computer	58.2	0	1	0	3	curved_sharp	-5.59184	-0.428571	-3.36735	-3.42857	-1.30612	0.612245	-0.489796	-4.87755	0505	frontal
20	001a3.jpg	pen	curved	No_Shaded	computer	61.8	1	0	0	1	sharp_curved	-5.59184	-0.428571	-3.36735	-3.42857	-1.30612	0.612245	-0.489796	-4.87755	0013	three_four
20	008a1.jpg	mirror	curved	No_Shaded	computer	82.8	1	0	0	1	curved_sharp	-5.59184	-0.428571	-3.36735	-3.42857	-1.30612	0.612245	-0.489796	-4.87755	0081	three_four
20	002a3.jpg	lamp	curved	No_Shaded	hand	22.4	1	0	0	1	curved_sharp	-5.59184	-0.428571	-3.36735	-3.42857	-1.30612	0.612245	-0.489796	-4.87755	0023	three_four
20	033a3.jpg	toaster	curved	No_Shaded	hand	29	0	1	0	3	curved_sharp	-5.59184	-0.428571	-3.36735	-3.42857	-1.30612	0.612245	-0.489796	-4.87755	0333	three_four
20	034s4.jpg	sponge	sharp	Shaded	hand	28	1	0	0	1	curved_sharp	-5.59184	-0.428571	-3.36735	-3.42857	-1.30612	0.612245	-0.489796	-4.87755	0344	three_four
20	022s4.jpg	glass/cup	sharp	Shaded	hand	99.6	1	0	0	1	curved_sharp	-5.59184	-0.428571	-3.36735	-3.42857	-1.30612	0.612245	-0.489796	-4.87755	0224	frontal
20	021a3.jpg	toaster	curved	No_Shaded	computer	16.6	0	1	0	3	sharp_curved	-5.59184	-0.428571	-3.36735	-3.42857	-1.30612	0.612245	-0.489796	-4.87755	0213	three_four
20	022s3.jpg	mobile phone	sharp	Shaded	hand	74.8	1	0	0	1	curved_sharp	-5.59184	-0.428571	-3.36735	-3.42857	-1.30612	0.612245	-0.489796	-4.87755	0223	three_four
20	016s6.jpg	watch	sharp	No_Shaded	hand	33.6	0	1	0	3	sharp_curved	-5.59184	-0.428571	-3.36735	-3.42857	-1.30612	0.612245	-0.489796	-4.87755	0166	frontal
20	019s5.jpg	tap	sharp	Shaded	computer	31.4	1	0	0	1	curved_sharp	-5.59184	-0.428571	-3.36735	-3.42857	-1.30612	0.612245	-0.489796	-4.87755	0195	three_four
20	040s6.jpg	chair	sharp	Shaded	hand	33.4	0	1	0	3	curved_sharp	-5.59184	-0.428571	-3.36735	-3.42857	-1.30612	0.612245	-0.489796	-4.87755	0406	three_four
20	002a5.jpg	umbrella	curved	No_Shaded	hand	29.4	1	0	0	1	curved_sharp	-5.59184	-0.428571	-3.36735	-3.42857	-1.30612	0.612245	-0.489796	-4.87755	0025	frontal
20	016a4.jpg	lightbulb	curved	No_Shaded	hand	29.2	1	0	0	1	sharp_curved	-5.59184	-0.428571	-3.36735	-3.42857	-1.30612	0.612245	-0.489796	-4.87755	0164	frontal
20	049s4.jpg	lamp	sharp	No_Shaded	hand	56.6	1	0	0	1	sharp_curved	-5.59184	-0.428571	-3.36735	-3.42857	-1.30612	0.612245	-0.489796	-4.87755	0494	frontal
20	050a7.jpg	mobile phone	curved	No_Shaded	computer	66.4	1	0	0	1	curved_sharp	-5.59184	-0.428571	-3.36735	-3.42857	-1.30612	0.612245	-0.489796	-4.87755	0507	frontal
20	025a5.jpg	glasses	curved	No_Shaded	hand	15.6	1	0	0	1	sharp_curved	-5.59184	-0.428571	-3.36735	-3.42857	-1.30612	0.612245	-0.489796	-4.87755	0255	three_four
20	025s4.jpg	handle	sharp	No_Shaded	hand	18.2	1	0	0	1	curved_sharp	-5.59184	-0.428571	-3.36735	-3.42857	-1.30612	0.612245	-0.489796	-4.87755	0254	frontal
20	010s1.jpg	handbag	sharp	No_Shaded	computer	26.4	1	0	0	1	sharp_curved	-5.59184	-0.428571	-3.36735	-3.42857	-1.30612	0.612245	-0.489796	-4.87755	0101	frontal
20	002s3.jpg	lamp	sharp	No_Shaded	hand	20.8	1	0	0	1	curved_sharp	-5.59184	-0.428571	-3.36735	-3.42857	-1.30612	0.612245	-0.489796	-4.87755	0023	three_four
20	050a4.jpg	coffee maker	curved	No_Shaded	computer	61.2	0	1	0	3	sharp_curved	-5.59184	-0.428571	-3.36735	-3.42857	-1.30612	0.612245	-0.489796	-4.87755	0504	frontal
20	040a5.jpg	watch	curved	Shaded	hand	69	0	1	0	3	curved_sharp	-5.59184	-0.428571	-3.36735	-3.42857	-1.30612	0.612245	-0.489796	-4.87755	0405	three_four
20	010a3.jpg	glasses	curved	No_Shaded	hand	32.2	1	0	0	1	sharp_curved	-5.59184	-0.428571	-3.36735	-3.42857	-1.30612	0.612245	-0.489796	-4.87755	0103	frontal
20	022a3.jpg	mobile phone	curved	Shaded	hand	60.6	1	0	0	1	curved_sharp	-5.59184	-0.428571	-3.36735	-3.42857	-1.30612	0.612245	-0.489796	-4.87755	0223	three_four
20	001s3.jpg	pen	sharp	No_Shaded	computer	47	1	0	0	1	sharp_curved	-5.59184	-0.428571	-3.36735	-3.42857	-1.30612	0.612245	-0.489796	-4.87755	0013	three_four
20	040a6.jpg	chair	curved	Shaded	hand	26.8	0	1	0	3	curved_sharp	-5.59184	-0.428571	-3.36735	-3.42857	-1.30612	0.612245	-0.489796	-4.87755	0406	three_four
20	039a3.jpg	glass	curved	Shaded	hand	30.4	1	0	0	1	sharp_curved	-5.59184	-0.428571	-3.36735	-3.42857	-1.30612	0.612245	-0.489796	-4.87755	0393	frontal
20	049a1.jpg	backpack	curved	No_Shaded	hand	56.2	1	0	0	1	sharp_curved	-5.59184	-0.428571	-3.36735	-3.42857	-1.30612	0.612245	-0.489796	-4.87755	0491	three_four
20	010a1.jpg	handbag	curved	No_Shaded	computer	30	1	0	0	1	sharp_curved	-5.59184	-0.428571	-3.36735	-3.42857	-1.30612	0.612245	-0.489796	-4.87755	0101	frontal
20	050s4.jpg	coffee maker	sharp	No_Shaded	computer	54.8	0	1	0	3	sharp_curved	-5.59184	-0.428571	-3.36735	-3.42857	-1.30612	0.612245	-0.489796	-4.87755	0504	frontal
20	019a4.jpg	duct tape	curved	Shaded	computer	73.4	1	0	0	1	sharp_curved	-5.59184	-0.428571	-3.36735	-3.42857	-1.30612	0.612245	-0.489796	-4.87755	0194	three_four
20	016s4.jpg	lightbulb	sharp	No_Shaded	hand	30	1	0	0	1	sharp_curved	-5.59184	-0.428571	-3.36735	-3.42857	-1.30612	0.612245	-0.489796	-4.87755	0164	frontal
20	010a4.jpg	clock	curved	No_Shaded	computer	31.4	1	0	0	1	curved_sharp	-5.59184	-0.428571	-3.36735	-3.42857	-1.30612	0.612245	-0.489796	-4.87755	0104	frontal
20	034s6.jpg	radio	sharp	Shaded	hand	34.8	1	0	0	1	sharp_curved	-5.59184	-0.428571	-3.36735	-3.42857	-1.30612	0.612245	-0.489796	-4.87755	0346	frontal
20	025s5.jpg	glasses	sharp	No_Shaded	hand	37.6	1	0	0	1	sharp_curved	-5.59184	-0.428571	-3.36735	-3.42857	-1.30612	0.612245	-0.489796	-4.87755	0255	three_four
20	033a6.jpg	teapot	curved	No_Shaded	hand	31.4	1	0	0	1	curved_sharp	-5.59184	-0.428571	-3.36735	-3.42857	-1.30612	0.612245	-0.489796	-4.87755	0336	frontal
20	025s6.jpg	comb	sharp	No_Shaded	hand	25.8	1	0	0	1	sharp_curved	-5.59184	-0.428571	-3.36735	-3.42857	-1.30612	0.612245	-0.489796	-4.87755	0256	frontal
20	040s2.jpg	scissors	sharp	Shaded	hand	29.4	1	0	0	1	curved_sharp	-5.59184	-0.428571	-3.36735	-3.42857	-1.30612	0.612245	-0.489796	-4.87755	0402	three_four
20	017s5.jpg	headphones	sharp	No_Shaded	hand	26.4	1	0	0	1	sharp_curved	-5.59184	-0.428571	-3.36735	-3.42857	-1.30612	0.612245	-0.489796	-4.87755	0175	frontal
20	039a1.jpg	coffee maker	curved	Shaded	hand	22.6	0	1	0	3	sharp_curved	-5.59184	-0.428571	-3.36735	-3.42857	-1.30612	0.612245	-0.489796	-4.87755	0391	frontal
20	016a6.jpg	watch	curved	No_Shaded	hand	21	0	1	0	3	sharp_curved	-5.59184	-0.428571	-3.36735	-3.42857	-1.30612	0.612245	-0.489796	-4.87755	0166	frontal
20	010a6.jpg	mirror	curved	No_Shaded	computer	20.6	1	0	0	1	sharp_curved	-5.59184	-0.428571	-3.36735	-3.42857	-1.30612	0.612245	-0.489796	-4.87755	0106	frontal
20	019s4.jpg	duct tape	sharp	Shaded	computer	75	1	0	0	1	sharp_curved	-5.59184	-0.428571	-3.36735	-3.42857	-1.30612	0.612245	-0.489796	-4.87755	0194	three_four
21	049s1.jpg	backpack	sharp	No_Shaded	hand	61.8	1	0	0	1	sharp_curved	-1.59184	-0.428571	11.6327	5.57143	-1.30612	3.61224	0.510204	-5.87755	0491	three_four
21	034a1.jpg	jug	curved	Shaded	hand	84	1	0	0	1	sharp_curved	-1.59184	-0.428571	11.6327	5.57143	-1.30612	3.61224	0.510204	-5.87755	0341	frontal
21	040s7.jpg	pencil sharpener	sharp	Shaded	hand	95	0	1	0	3	curved_sharp	-1.59184	-0.428571	11.6327	5.57143	-1.30612	3.61224	0.510204	-5.87755	0407	three_four
21	001a1.jpg	hat	curved	No_Shaded	computer	77.8	0	0	1	2	curved_sharp	-1.59184	-0.428571	11.6327	5.57143	-1.30612	3.61224	0.510204	-5.87755	0011	three_four
21	025a5.jpg	glasses	curved	No_Shaded	hand	99.2	1	0	0	1	sharp_curved	-1.59184	-0.428571	11.6327	5.57143	-1.30612	3.61224	0.510204	-5.87755	0255	three_four
21	033a6.jpg	teapot	curved	No_Shaded	hand	47.4	1	0	0	1	curved_sharp	-1.59184	-0.428571	11.6327	5.57143	-1.30612	3.61224	0.510204	-5.87755	0336	frontal
21	019s4.jpg	duct tape	sharp	Shaded	computer	100	1	0	0	1	sharp_curved	-1.59184	-0.428571	11.6327	5.57143	-1.30612	3.61224	0.510204	-5.87755	0194	three_four
21	010s7.jpg	remote control	sharp	No_Shaded	hand	35.2	0	0	1	2	sharp_curved	-1.59184	-0.428571	11.6327	5.57143	-1.30612	3.61224	0.510204	-5.87755	0107	three_four
21	050a5.jpg	tvmonitor	curved	No_Shaded	computer	80.8	1	0	0	1	sharp_curved	-1.59184	-0.428571	11.6327	5.57143	-1.30612	3.61224	0.510204	-5.87755	0505	frontal
21	010s1.jpg	handbag	sharp	No_Shaded	computer	55.2	1	0	0	1	curved_sharp	-1.59184	-0.428571	11.6327	5.57143	-1.30612	3.61224	0.510204	-5.87755	0101	frontal
21	012s6.jpg	door	sharp	No_Shaded	hand	25.4	0	0	1	2	curved_sharp	-1.59184	-0.428571	11.6327	5.57143	-1.30612	3.61224	0.510204	-5.87755	0126	frontal
21	001s1.jpg	hat	sharp	No_Shaded	computer	47.4	0	0	1	2	curved_sharp	-1.59184	-0.428571	11.6327	5.57143	-1.30612	3.61224	0.510204	-5.87755	0011	three_four
21	034s4.jpg	sponge	sharp	Shaded	hand	62.6	0	1	0	3	sharp_curved	-1.59184	-0.428571	11.6327	5.57143	-1.30612	3.61224	0.510204	-5.87755	0344	three_four
21	050a7.jpg	mobile phone	curved	No_Shaded	computer	71.2	1	0	0	1	curved_sharp	-1.59184	-0.428571	11.6327	5.57143	-1.30612	3.61224	0.510204	-5.87755	0507	frontal
21	049s2.jpg	tv	sharp	No_Shaded	hand	63	0	1	0	3	curved_sharp	-1.59184	-0.428571	11.6327	5.57143	-1.30612	3.61224	0.510204	-5.87755	0492	frontal
21	033s3.jpg	toaster	sharp	No_Shaded	hand	22.2	1	0	0	1	sharp_curved	-1.59184	-0.428571	11.6327	5.57143	-1.30612	3.61224	0.510204	-5.87755	0333	three_four
21	025s4.jpg	handle	sharp	No_Shaded	hand	27.2	0	1	0	3	curved_sharp	-1.59184	-0.428571	11.6327	5.57143	-1.30612	3.61224	0.510204	-5.87755	0254	frontal
21	010s3.jpg	glasses	sharp	No_Shaded	hand	34.4	1	0	0	1	curved_sharp	-1.59184	-0.428571	11.6327	5.57143	-1.30612	3.61224	0.510204	-5.87755	0103	frontal
21	017a1.jpg	lighter	curved	Shaded	hand	57.8	1	0	0	1	curved_sharp	-1.59184	-0.428571	11.6327	5.57143	-1.30612	3.61224	0.510204	-5.87755	0171	three_four
21	039a1.jpg	coffee maker	curved	Shaded	hand	46	0	0	1	2	sharp_curved	-1.59184	-0.428571	11.6327	5.57143	-1.30612	3.61224	0.510204	-5.87755	0391	frontal
21	034s3.jpg	handle	sharp	Shaded	hand	46	0	1	0	3	curved_sharp	-1.59184	-0.428571	11.6327	5.57143	-1.30612	3.61224	0.510204	-5.87755	0343	frontal
21	040s5.jpg	watch	sharp	Shaded	hand	56.4	1	0	0	1	curved_sharp	-1.59184	-0.428571	11.6327	5.57143	-1.30612	3.61224	0.510204	-5.87755	0405	three_four
21	049a4.jpg	lamp	curved	No_Shaded	hand	75.4	1	0	0	1	curved_sharp	-1.59184	-0.428571	11.6327	5.57143	-1.30612	3.61224	0.510204	-5.87755	0494	frontal
21	050s4.jpg	coffee maker	sharp	No_Shaded	computer	69.4	1	0	0	1	sharp_curved	-1.59184	-0.428571	11.6327	5.57143	-1.30612	3.61224	0.510204	-5.87755	0504	frontal
21	039a3.jpg	glass	curved	Shaded	hand	55.4	0	1	0	3	curved_sharp	-1.59184	-0.428571	11.6327	5.57143	-1.30612	3.61224	0.510204	-5.87755	0393	frontal
21	014a5.jpg	cap	curved	No_Shaded	hand	54.6	1	0	0	1	sharp_curved	-1.59184	-0.428571	11.6327	5.57143	-1.30612	3.61224	0.510204	-5.87755	0145	three_four
21	040s6.jpg	chair	sharp	Shaded	hand	85	0	1	0	3	sharp_curved	-1.59184	-0.428571	11.6327	5.57143	-1.30612	3.61224	0.510204	-5.87755	0406	three_four
21	025s5.jpg	glasses	sharp	No_Shaded	hand	60	1	0	0	1	sharp_curved	-1.59184	-0.428571	11.6327	5.57143	-1.30612	3.61224	0.510204	-5.87755	0255	three_four
21	016s4.jpg	lightbulb	sharp	No_Shaded	hand	46.8	1	0	0	1	sharp_curved	-1.59184	-0.428571	11.6327	5.57143	-1.30612	3.61224	0.510204	-5.87755	0164	frontal
21	010s6.jpg	mirror	sharp	No_Shaded	computer	80.2	0	1	0	3	curved_sharp	-1.59184	-0.428571	11.6327	5.57143	-1.30612	3.61224	0.510204	-5.87755	0106	frontal
21	049a2.jpg	tv	curved	No_Shaded	hand	61.2	0	1	0	3	curved_sharp	-1.59184	-0.428571	11.6327	5.57143	-1.30612	3.61224	0.510204	-5.87755	0492	frontal
21	022a3.jpg	mobile phone	curved	Shaded	hand	85.8	0	0	1	2	curved_sharp	-1.59184	-0.428571	11.6327	5.57143	-1.30612	3.61224	0.510204	-5.87755	0223	three_four
21	040a5.jpg	watch	curved	Shaded	hand	77.6	1	0	0	1	curved_sharp	-1.59184	-0.428571	11.6327	5.57143	-1.30612	3.61224	0.510204	-5.87755	0405	three_four
21	034a4.jpg	sponge	curved	Shaded	hand	57.2	0	1	0	3	sharp_curved	-1.59184	-0.428571	11.6327	5.57143	-1.30612	3.61224	0.510204	-5.87755	0344	three_four
21	025s6.jpg	comb	sharp	No_Shaded	hand	53.4	0	0	1	2	sharp_curved	-1.59184	-0.428571	11.6327	5.57143	-1.30612	3.61224	0.510204	-5.87755	0256	frontal
21	008s1.jpg	mirror	sharp	No_Shaded	computer	85.4	0	1	0	3	curved_sharp	-1.59184	-0.428571	11.6327	5.57143	-1.30612	3.61224	0.510204	-5.87755	0081	three_four
21	049s4.jpg	lamp	sharp	No_Shaded	hand	87.6	1	0	0	1	curved_sharp	-1.59184	-0.428571	11.6327	5.57143	-1.30612	3.61224	0.510204	-5.87755	0494	frontal
21	040a6.jpg	chair	curved	Shaded	hand	75.6	0	1	0	3	sharp_curved	-1.59184	-0.428571	11.6327	5.57143	-1.30612	3.61224	0.510204	-5.87755	0406	three_four
21	050a4.jpg	coffee maker	curved	No_Shaded	computer	82.4	1	0	0	1	sharp_curved	-1.59184	-0.428571	11.6327	5.57143	-1.30612	3.61224	0.510204	-5.87755	0504	frontal
21	021s4.jpg	remote control	sharp	No_Shaded	computer	90.6	0	0	1	2	sharp_curved	-1.59184	-0.428571	11.6327	5.57143	-1.30612	3.61224	0.510204	-5.87755	0214	three_four
21	033a3.jpg	toaster	curved	No_Shaded	hand	58.2	1	0	0	1	sharp_curved	-1.59184	-0.428571	11.6327	5.57143	-1.30612	3.61224	0.510204	-5.87755	0333	three_four
21	010s4.jpg	clock	sharp	No_Shaded	computer	49.4	1	0	0	1	curved_sharp	-1.59184	-0.428571	11.6327	5.57143	-1.30612	3.61224	0.510204	-5.87755	0104	frontal
21	027a2.jpg	electric guitar	curved	No_Shaded	computer	85	0	1	0	3	sharp_curved	-1.59184	-0.428571	11.6327	5.57143	-1.30612	3.61224	0.510204	-5.87755	0272	frontal
21	033s6.jpg	teapot	sharp	No_Shaded	hand	10.6	1	0	0	1	curved_sharp	-1.59184	-0.428571	11.6327	5.57143	-1.30612	3.61224	0.510204	-5.87755	0336	frontal
21	052a2.jpg	photo frame	curved	No_Shaded	computer	65.4	0	1	0	3	curved_sharp	-1.59184	-0.428571	11.6327	5.57143	-1.30612	3.61224	0.510204	-5.87755	0522	three_four
21	034a3.jpg	handle	curved	Shaded	hand	51	0	1	0	3	curved_sharp	-1.59184	-0.428571	11.6327	5.57143	-1.30612	3.61224	0.510204	-5.87755	0343	frontal
21	016a6.jpg	watch	curved	No_Shaded	hand	48	1	0	0	1	curved_sharp	-1.59184	-0.428571	11.6327	5.57143	-1.30612	3.61224	0.510204	-5.87755	0166	frontal
21	019a5.jpg	tap	curved	Shaded	computer	52.2	0	1	0	3	sharp_curved	-1.59184	-0.428571	11.6327	5.57143	-1.30612	3.61224	0.510204	-5.87755	0195	three_four
21	039s1.jpg	coffee maker	sharp	Shaded	hand	33.6	0	0	1	2	sharp_curved	-1.59184	-0.428571	11.6327	5.57143	-1.30612	3.61224	0.510204	-5.87755	0391	frontal
21	002s3.jpg	lamp	sharp	No_Shaded	hand	34.4	0	0	1	2	curved_sharp	-1.59184	-0.428571	11.6327	5.57143	-1.30612	3.61224	0.510204	-5.87755	0023	three_four
21	022a4.jpg	glass/cup	curved	Shaded	hand	100	0	0	1	2	sharp_curved	-1.59184	-0.428571	11.6327	5.57143	-1.30612	3.61224	0.510204	-5.87755	0224	frontal
21	050s7.jpg	mobile phone	sharp	No_Shaded	computer	44.6	1	0	0	1	curved_sharp	-1.59184	-0.428571	11.6327	5.57143	-1.30612	3.61224	0.510204	-5.87755	0507	frontal
21	049a1.jpg	backpack	curved	No_Shaded	hand	75	1	0	0	1	sharp_curved	-1.59184	-0.428571	11.6327	5.57143	-1.30612	3.61224	0.510204	-5.87755	0491	three_four
21	010a7.jpg	remote control	curved	No_Shaded	hand	53.8	0	0	1	2	sharp_curved	-1.59184	-0.428571	11.6327	5.57143	-1.30612	3.61224	0.510204	-5.87755	0107	three_four
21	034s6.jpg	radio	sharp	Shaded	hand	50.2	0	1	0	3	curved_sharp	-1.59184	-0.428571	11.6327	5.57143	-1.30612	3.61224	0.510204	-5.87755	0346	frontal
21	019a4.jpg	duct tape	curved	Shaded	computer	43.2	1	0	0	1	sharp_curved	-1.59184	-0.428571	11.6327	5.57143	-1.30612	3.61224	0.510204	-5.87755	0194	three_four
21	001s3.jpg	pen	sharp	No_Shaded	computer	52.4	1	0	0	1	curved_sharp	-1.59184	-0.428571	11.6327	5.57143	-1.30612	3.61224	0.510204	-5.87755	0013	three_four
21	040s2.jpg	scissors	sharp	Shaded	hand	47.2	1	0	0	1	curved_sharp	-1.59184	-0.428571	11.6327	5.57143	-1.30612	3.61224	0.510204	-5.87755	0402	three_four
21	050s5.jpg	tvmonitor	sharp	No_Shaded	computer	50.2	1	0	0	1	sharp_curved	-1.59184	-0.428571	11.6327	5.57143	-1.30612	3.61224	0.510204	-5.87755	0505	frontal
21	034s1.jpg	jug	sharp	Shaded	hand	25.6	1	0	0	1	sharp_curved	-1.59184	-0.428571	11.6327	5.57143	-1.30612	3.61224	0.510204	-5.87755	0341	frontal
21	017a5.jpg	headphones	curved	No_Shaded	hand	52.4	1	0	0	1	sharp_curved	-1.59184	-0.428571	11.6327	5.57143	-1.30612	3.61224	0.510204	-5.87755	0175	frontal
21	025a6.jpg	comb	curved	No_Shaded	hand	63.2	0	0	1	2	sharp_curved	-1.59184	-0.428571	11.6327	5.57143	-1.30612	3.61224	0.510204	-5.87755	0256	frontal
21	002a5.jpg	umbrella	curved	No_Shaded	hand	53.6	1	0	0	1	curved_sharp	-1.59184	-0.428571	11.6327	5.57143	-1.30612	3.61224	0.510204	-5.87755	0025	frontal
21	010a1.jpg	handbag	curved	No_Shaded	computer	57	1	0	0	1	curved_sharp	-1.59184	-0.428571	11.6327	5.57143	-1.30612	3.61224	0.510204	-5.87755	0101	frontal
21	017s1.jpg	lighter	sharp	Shaded	hand	61	1	0	0	1	curved_sharp	-1.59184	-0.428571	11.6327	5.57143	-1.30612	3.61224	0.510204	-5.87755	0171	three_four
21	052s2.jpg	photo frame	sharp	No_Shaded	computer	61.6	0	1	0	3	curved_sharp	-1.59184	-0.428571	11.6327	5.57143	-1.30612	3.61224	0.510204	-5.87755	0522	three_four
21	008a1.jpg	mirror	curved	No_Shaded	computer	70.6	0	1	0	3	curved_sharp	-1.59184	-0.428571	11.6327	5.57143	-1.30612	3.61224	0.510204	-5.87755	0081	three_four
21	014s5.jpg	cap	sharp	No_Shaded	hand	65.2	1	0	0	1	sharp_curved	-1.59184	-0.428571	11.6327	5.57143	-1.30612	3.61224	0.510204	-5.87755	0145	three_four
21	002a3.jpg	lamp	curved	No_Shaded	hand	58.6	0	0	1	2	curved_sharp	-1.59184	-0.428571	11.6327	5.57143	-1.30612	3.61224	0.510204	-5.87755	0023	three_four
21	034a6.jpg	radio	curved	Shaded	hand	20	0	1	0	3	curved_sharp	-1.59184	-0.428571	11.6327	5.57143	-1.30612	3.61224	0.510204	-5.87755	0346	frontal
21	016s6.jpg	watch	sharp	No_Shaded	hand	18.6	1	0	0	1	curved_sharp	-1.59184	-0.428571	11.6327	5.57143	-1.30612	3.61224	0.510204	-5.87755	0166	frontal
21	001a3.jpg	pen	curved	No_Shaded	computer	64.2	1	0	0	1	curved_sharp	-1.59184	-0.428571	11.6327	5.57143	-1.30612	3.61224	0.510204	-5.87755	0013	three_four
21	021a3.jpg	toaster	curved	No_Shaded	computer	42.2	0	1	0	3	sharp_curved	-1.59184	-0.428571	11.6327	5.57143	-1.30612	3.61224	0.510204	-5.87755	0213	three_four
21	040a7.jpg	pencil sharpener	curved	Shaded	hand	34	0	1	0	3	curved_sharp	-1.59184	-0.428571	11.6327	5.57143	-1.30612	3.61224	0.510204	-5.87755	0407	three_four
21	012a6.jpg	door	curved	No_Shaded	hand	27.6	0	0	1	2	curved_sharp	-1.59184	-0.428571	11.6327	5.57143	-1.30612	3.61224	0.510204	-5.87755	0126	frontal
21	022s3.jpg	mobile phone	sharp	Shaded	hand	92.8	0	0	1	2	curved_sharp	-1.59184	-0.428571	11.6327	5.57143	-1.30612	3.61224	0.510204	-5.87755	0223	three_four
21	016a4.jpg	lightbulb	curved	No_Shaded	hand	42	1	0	0	1	sharp_curved	-1.59184	-0.428571	11.6327	5.57143	-1.30612	3.61224	0.510204	-5.87755	0164	frontal
21	010a3.jpg	glasses	curved	No_Shaded	hand	24.4	1	0	0	1	curved_sharp	-1.59184	-0.428571	11.6327	5.57143	-1.30612	3.61224	0.510204	-5.87755	0103	frontal
21	021s3.jpg	toaster	sharp	No_Shaded	computer	24	0	1	0	3	sharp_curved	-1.59184	-0.428571	11.6327	5.57143	-1.30612	3.61224	0.510204	-5.87755	0213	three_four
21	019s5.jpg	tap	sharp	Shaded	computer	86.4	0	1	0	3	sharp_curved	-1.59184	-0.428571	11.6327	5.57143	-1.30612	3.61224	0.510204	-5.87755	0195	three_four
21	039s3.jpg	glass	sharp	Shaded	hand	83.4	0	1	0	3	curved_sharp	-1.59184	-0.428571	11.6327	5.57143	-1.30612	3.61224	0.510204	-5.87755	0393	frontal
21	040a2.jpg	scissors	curved	Shaded	hand	98.4	1	0	0	1	curved_sharp	-1.59184	-0.428571	11.6327	5.57143	-1.30612	3.61224	0.510204	-5.87755	0402	three_four
21	021a4.jpg	remote control	curved	No_Shaded	computer	71.4	0	0	1	2	sharp_curved	-1.59184	-0.428571	11.6327	5.57143	-1.30612	3.61224	0.510204	-5.87755	0214	three_four
21	025a4.jpg	handle	curved	No_Shaded	hand	27.4	0	1	0	3	curved_sharp	-1.59184	-0.428571	11.6327	5.57143	-1.30612	3.61224	0.510204	-5.87755	0254	frontal
21	010a6.jpg	mirror	curved	No_Shaded	computer	31.2	0	1	0	3	curved_sharp	-1.59184	-0.428571	11.6327	5.57143	-1.30612	3.61224	0.510204	-5.87755	0106	frontal
21	017s5.jpg	headphones	sharp	No_Shaded	hand	32.8	1	0	0	1	sharp_curved	-1.59184	-0.428571	11.6327	5.57143	-1.30612	3.61224	0.510204	-5.87755	0175	frontal
21	022s4.jpg	glass/cup	sharp	Shaded	hand	99.2	0	0	1	2	sharp_curved	-1.59184	-0.428571	11.6327	5.57143	-1.30612	3.61224	0.510204	-5.87755	0224	frontal
21	027s2.jpg	electric guitar	sharp	No_Shaded	computer	83.4	0	1	0	3	sharp_curved	-1.59184	-0.428571	11.6327	5.57143	-1.30612	3.61224	0.510204	-5.87755	0272	frontal
21	002s5.jpg	umbrella	sharp	No_Shaded	hand	44	1	0	0	1	curved_sharp	-1.59184	-0.428571	11.6327	5.57143	-1.30612	3.61224	0.510204	-5.87755	0025	frontal
21	010a4.jpg	clock	curved	No_Shaded	computer	86.4	1	0	0	1	curved_sharp	-1.59184	-0.428571	11.6327	5.57143	-1.30612	3.61224	0.510204	-5.87755	0104	frontal
22	052a2.jpg	photo frame	curved	No_Shaded	computer	76.2	0	0	1	2	curved_sharp	9.40816	-0.428571	7.63265	0.571429	1.69388	-0.387755	1.5102	-2.87755	0522	three_four
22	001s1.jpg	hat	sharp	No_Shaded	computer	27.8	0	0	1	2	curved_sharp	9.40816	-0.428571	7.63265	0.571429	1.69388	-0.387755	1.5102	-2.87755	0011	three_four
22	027a2.jpg	electric guitar	curved	No_Shaded	computer	72	1	0	0	1	sharp_curved	9.40816	-0.428571	7.63265	0.571429	1.69388	-0.387755	1.5102	-2.87755	0272	frontal
22	050s5.jpg	tvmonitor	sharp	No_Shaded	computer	65.8	0	0	1	2	sharp_curved	9.40816	-0.428571	7.63265	0.571429	1.69388	-0.387755	1.5102	-2.87755	0505	frontal
22	014s5.jpg	cap	sharp	No_Shaded	hand	89.8	1	0	0	1	curved_sharp	9.40816	-0.428571	7.63265	0.571429	1.69388	-0.387755	1.5102	-2.87755	0145	three_four
22	034s4.jpg	sponge	sharp	Shaded	hand	55.8	1	0	0	1	curved_sharp	9.40816	-0.428571	7.63265	0.571429	1.69388	-0.387755	1.5102	-2.87755	0344	three_four
22	049a1.jpg	backpack	curved	No_Shaded	hand	77.2	1	0	0	1	sharp_curved	9.40816	-0.428571	7.63265	0.571429	1.69388	-0.387755	1.5102	-2.87755	0491	three_four
22	010a7.jpg	remote control	curved	No_Shaded	hand	3.4	1	0	0	1	sharp_curved	9.40816	-0.428571	7.63265	0.571429	1.69388	-0.387755	1.5102	-2.87755	0107	three_four
22	017a5.jpg	headphones	curved	No_Shaded	hand	27.6	1	0	0	1	sharp_curved	9.40816	-0.428571	7.63265	0.571429	1.69388	-0.387755	1.5102	-2.87755	0175	frontal
22	039a3.jpg	glass	curved	Shaded	hand	74.4	0	0	1	2	curved_sharp	9.40816	-0.428571	7.63265	0.571429	1.69388	-0.387755	1.5102	-2.87755	0393	frontal
22	034s6.jpg	radio	sharp	Shaded	hand	82	0	1	0	3	curved_sharp	9.40816	-0.428571	7.63265	0.571429	1.69388	-0.387755	1.5102	-2.87755	0346	frontal
22	010s1.jpg	handbag	sharp	No_Shaded	computer	12	1	0	0	1	sharp_curved	9.40816	-0.428571	7.63265	0.571429	1.69388	-0.387755	1.5102	-2.87755	0101	frontal
22	022a4.jpg	glass/cup	curved	Shaded	hand	96.8	1	0	0	1	curved_sharp	9.40816	-0.428571	7.63265	0.571429	1.69388	-0.387755	1.5102	-2.87755	0224	frontal
22	012a6.jpg	door	curved	No_Shaded	hand	29.2	0	0	1	2	sharp_curved	9.40816	-0.428571	7.63265	0.571429	1.69388	-0.387755	1.5102	-2.87755	0126	frontal
22	034s1.jpg	jug	sharp	Shaded	hand	24	0	0	1	2	curved_sharp	9.40816	-0.428571	7.63265	0.571429	1.69388	-0.387755	1.5102	-2.87755	0341	frontal
22	025s5.jpg	glasses	sharp	No_Shaded	hand	18.6	1	0	0	1	curved_sharp	9.40816	-0.428571	7.63265	0.571429	1.69388	-0.387755	1.5102	-2.87755	0255	three_four
22	050a5.jpg	tvmonitor	curved	No_Shaded	computer	52.6	0	0	1	2	sharp_curved	9.40816	-0.428571	7.63265	0.571429	1.69388	-0.387755	1.5102	-2.87755	0505	frontal
22	040a2.jpg	scissors	curved	Shaded	hand	92	1	0	0	1	curved_sharp	9.40816	-0.428571	7.63265	0.571429	1.69388	-0.387755	1.5102	-2.87755	0402	three_four
22	025a4.jpg	handle	curved	No_Shaded	hand	48.4	1	0	0	1	sharp_curved	9.40816	-0.428571	7.63265	0.571429	1.69388	-0.387755	1.5102	-2.87755	0254	frontal
22	002s5.jpg	umbrella	sharp	No_Shaded	hand	22.2	1	0	0	1	curved_sharp	9.40816	-0.428571	7.63265	0.571429	1.69388	-0.387755	1.5102	-2.87755	0025	frontal
22	040a6.jpg	chair	curved	Shaded	hand	83.4	0	0	1	2	curved_sharp	9.40816	-0.428571	7.63265	0.571429	1.69388	-0.387755	1.5102	-2.87755	0406	three_four
22	010a4.jpg	clock	curved	No_Shaded	computer	56	0	0	1	2	curved_sharp	9.40816	-0.428571	7.63265	0.571429	1.69388	-0.387755	1.5102	-2.87755	0104	frontal
22	040s2.jpg	scissors	sharp	Shaded	hand	80.8	1	0	0	1	curved_sharp	9.40816	-0.428571	7.63265	0.571429	1.69388	-0.387755	1.5102	-2.87755	0402	three_four
22	002a3.jpg	lamp	curved	No_Shaded	hand	35.2	0	0	1	2	sharp_curved	9.40816	-0.428571	7.63265	0.571429	1.69388	-0.387755	1.5102	-2.87755	0023	three_four
22	017a1.jpg	lighter	curved	Shaded	hand	97.8	1	0	0	1	sharp_curved	9.40816	-0.428571	7.63265	0.571429	1.69388	-0.387755	1.5102	-2.87755	0171	three_four
22	010s7.jpg	remote control	sharp	No_Shaded	hand	17	1	0	0	1	sharp_curved	9.40816	-0.428571	7.63265	0.571429	1.69388	-0.387755	1.5102	-2.87755	0107	three_four
22	002a5.jpg	umbrella	curved	No_Shaded	hand	91.8	1	0	0	1	curved_sharp	9.40816	-0.428571	7.63265	0.571429	1.69388	-0.387755	1.5102	-2.87755	0025	frontal
22	016a6.jpg	watch	curved	No_Shaded	hand	26.4	1	0	0	1	curved_sharp	9.40816	-0.428571	7.63265	0.571429	1.69388	-0.387755	1.5102	-2.87755	0166	frontal
22	027s2.jpg	electric guitar	sharp	No_Shaded	computer	77	1	0	0	1	sharp_curved	9.40816	-0.428571	7.63265	0.571429	1.69388	-0.387755	1.5102	-2.87755	0272	frontal
22	050a7.jpg	mobile phone	curved	No_Shaded	computer	65.6	0	0	1	2	curved_sharp	9.40816	-0.428571	7.63265	0.571429	1.69388	-0.387755	1.5102	-2.87755	0507	frontal
22	039s3.jpg	glass	sharp	Shaded	hand	95.8	0	0	1	2	curved_sharp	9.40816	-0.428571	7.63265	0.571429	1.69388	-0.387755	1.5102	-2.87755	0393	frontal
22	034s3.jpg	handle	sharp	Shaded	hand	22	1	0	0	1	sharp_curved	9.40816	-0.428571	7.63265	0.571429	1.69388	-0.387755	1.5102	-2.87755	0343	frontal
22	033s6.jpg	teapot	sharp	No_Shaded	hand	39	1	0	0	1	curved_sharp	9.40816	-0.428571	7.63265	0.571429	1.69388	-0.387755	1.5102	-2.87755	0336	frontal
22	008a1.jpg	mirror	curved	No_Shaded	computer	83.4	0	0	1	2	sharp_curved	9.40816	-0.428571	7.63265	0.571429	1.69388	-0.387755	1.5102	-2.87755	0081	three_four
22	010s3.jpg	glasses	sharp	No_Shaded	hand	21	1	0	0	1	sharp_curved	9.40816	-0.428571	7.63265	0.571429	1.69388	-0.387755	1.5102	-2.87755	0103	frontal
22	034a6.jpg	radio	curved	Shaded	hand	71.6	0	1	0	3	curved_sharp	9.40816	-0.428571	7.63265	0.571429	1.69388	-0.387755	1.5102	-2.87755	0346	frontal
22	025a6.jpg	comb	curved	No_Shaded	hand	30.6	1	0	0	1	sharp_curved	9.40816	-0.428571	7.63265	0.571429	1.69388	-0.387755	1.5102	-2.87755	0256	frontal
22	040s6.jpg	chair	sharp	Shaded	hand	66	0	0	1	2	curved_sharp	9.40816	-0.428571	7.63265	0.571429	1.69388	-0.387755	1.5102	-2.87755	0406	three_four
22	012s6.jpg	door	sharp	No_Shaded	hand	26	0	0	1	2	sharp_curved	9.40816	-0.428571	7.63265	0.571429	1.69388	-0.387755	1.5102	-2.87755	0126	frontal
22	002s3.jpg	lamp	sharp	No_Shaded	hand	29	0	0	1	2	sharp_curved	9.40816	-0.428571	7.63265	0.571429	1.69388	-0.387755	1.5102	-2.87755	0023	three_four
22	021a4.jpg	remote control	curved	No_Shaded	computer	51	0	0	1	2	curved_sharp	9.40816	-0.428571	7.63265	0.571429	1.69388	-0.387755	1.5102	-2.87755	0214	three_four
22	001a3.jpg	pen	curved	No_Shaded	computer	98.8	1	0	0	1	sharp_curved	9.40816	-0.428571	7.63265	0.571429	1.69388	-0.387755	1.5102	-2.87755	0013	three_four
22	016s4.jpg	lightbulb	sharp	No_Shaded	hand	83.6	1	0	0	1	curved_sharp	9.40816	-0.428571	7.63265	0.571429	1.69388	-0.387755	1.5102	-2.87755	0164	frontal
22	019a5.jpg	tap	curved	Shaded	computer	9.6	0	1	0	3	curved_sharp	9.40816	-0.428571	7.63265	0.571429	1.69388	-0.387755	1.5102	-2.87755	0195	three_four
22	033a3.jpg	toaster	curved	No_Shaded	hand	46.4	1	0	0	1	curved_sharp	9.40816	-0.428571	7.63265	0.571429	1.69388	-0.387755	1.5102	-2.87755	0333	three_four
22	049a2.jpg	tv	curved	No_Shaded	hand	74.2	1	0	0	1	sharp_curved	9.40816	-0.428571	7.63265	0.571429	1.69388	-0.387755	1.5102	-2.87755	0492	frontal
22	049a4.jpg	lamp	curved	No_Shaded	hand	84.6	1	0	0	1	curved_sharp	9.40816	-0.428571	7.63265	0.571429	1.69388	-0.387755	1.5102	-2.87755	0494	frontal
22	019s4.jpg	duct tape	sharp	Shaded	computer	100	1	0	0	1	curved_sharp	9.40816	-0.428571	7.63265	0.571429	1.69388	-0.387755	1.5102	-2.87755	0194	three_four
22	040s5.jpg	watch	sharp	Shaded	hand	89.6	0	1	0	3	curved_sharp	9.40816	-0.428571	7.63265	0.571429	1.69388	-0.387755	1.5102	-2.87755	0405	three_four
22	025s4.jpg	handle	sharp	No_Shaded	hand	79	1	0	0	1	sharp_curved	9.40816	-0.428571	7.63265	0.571429	1.69388	-0.387755	1.5102	-2.87755	0254	frontal
22	017s1.jpg	lighter	sharp	Shaded	hand	89.2	1	0	0	1	sharp_curved	9.40816	-0.428571	7.63265	0.571429	1.69388	-0.387755	1.5102	-2.87755	0171	three_four
22	021a3.jpg	toaster	curved	No_Shaded	computer	52.2	1	0	0	1	sharp_curved	9.40816	-0.428571	7.63265	0.571429	1.69388	-0.387755	1.5102	-2.87755	0213	three_four
22	010a3.jpg	glasses	curved	No_Shaded	hand	49.2	1	0	0	1	sharp_curved	9.40816	-0.428571	7.63265	0.571429	1.69388	-0.387755	1.5102	-2.87755	0103	frontal
22	016s6.jpg	watch	sharp	No_Shaded	hand	35.6	1	0	0	1	curved_sharp	9.40816	-0.428571	7.63265	0.571429	1.69388	-0.387755	1.5102	-2.87755	0166	frontal
22	010s4.jpg	clock	sharp	No_Shaded	computer	71	0	0	1	2	curved_sharp	9.40816	-0.428571	7.63265	0.571429	1.69388	-0.387755	1.5102	-2.87755	0104	frontal
22	019s5.jpg	tap	sharp	Shaded	computer	99.2	0	1	0	3	curved_sharp	9.40816	-0.428571	7.63265	0.571429	1.69388	-0.387755	1.5102	-2.87755	0195	three_four
22	034a1.jpg	jug	curved	Shaded	hand	81.6	0	0	1	2	curved_sharp	9.40816	-0.428571	7.63265	0.571429	1.69388	-0.387755	1.5102	-2.87755	0341	frontal
22	001s3.jpg	pen	sharp	No_Shaded	computer	63.6	1	0	0	1	sharp_curved	9.40816	-0.428571	7.63265	0.571429	1.69388	-0.387755	1.5102	-2.87755	0013	three_four
22	049s2.jpg	tv	sharp	No_Shaded	hand	87	1	0	0	1	sharp_curved	9.40816	-0.428571	7.63265	0.571429	1.69388	-0.387755	1.5102	-2.87755	0492	frontal
22	039s1.jpg	coffee maker	sharp	Shaded	hand	96.2	0	1	0	3	curved_sharp	9.40816	-0.428571	7.63265	0.571429	1.69388	-0.387755	1.5102	-2.87755	0391	frontal
22	001a1.jpg	hat	curved	No_Shaded	computer	55.8	0	0	1	2	curved_sharp	9.40816	-0.428571	7.63265	0.571429	1.69388	-0.387755	1.5102	-2.87755	0011	three_four
22	040s7.jpg	pencil sharpener	sharp	Shaded	hand	58.8	0	1	0	3	curved_sharp	9.40816	-0.428571	7.63265	0.571429	1.69388	-0.387755	1.5102	-2.87755	0407	three_four
22	033a6.jpg	teapot	curved	No_Shaded	hand	14.8	1	0	0	1	curved_sharp	9.40816	-0.428571	7.63265	0.571429	1.69388	-0.387755	1.5102	-2.87755	0336	frontal
22	014a5.jpg	cap	curved	No_Shaded	hand	71.8	1	0	0	1	curved_sharp	9.40816	-0.428571	7.63265	0.571429	1.69388	-0.387755	1.5102	-2.87755	0145	three_four
22	022a3.jpg	mobile phone	curved	Shaded	hand	99.2	1	0	0	1	sharp_curved	9.40816	-0.428571	7.63265	0.571429	1.69388	-0.387755	1.5102	-2.87755	0223	three_four
22	049s1.jpg	backpack	sharp	No_Shaded	hand	65.4	1	0	0	1	sharp_curved	9.40816	-0.428571	7.63265	0.571429	1.69388	-0.387755	1.5102	-2.87755	0491	three_four
22	019a4.jpg	duct tape	curved	Shaded	computer	98	1	0	0	1	curved_sharp	9.40816	-0.428571	7.63265	0.571429	1.69388	-0.387755	1.5102	-2.87755	0194	three_four
22	010a6.jpg	mirror	curved	No_Shaded	computer	96.2	1	0	0	1	sharp_curved	9.40816	-0.428571	7.63265	0.571429	1.69388	-0.387755	1.5102	-2.87755	0106	frontal
22	050s7.jpg	mobile phone	sharp	No_Shaded	computer	64	0	0	1	2	curved_sharp	9.40816	-0.428571	7.63265	0.571429	1.69388	-0.387755	1.5102	-2.87755	0507	frontal
22	049s4.jpg	lamp	sharp	No_Shaded	hand	59.8	1	0	0	1	curved_sharp	9.40816	-0.428571	7.63265	0.571429	1.69388	-0.387755	1.5102	-2.87755	0494	frontal
22	040a7.jpg	pencil sharpener	curved	Shaded	hand	91.4	0	1	0	3	curved_sharp	9.40816	-0.428571	7.63265	0.571429	1.69388	-0.387755	1.5102	-2.87755	0407	three_four
22	025s6.jpg	comb	sharp	No_Shaded	hand	14.8	1	0	0	1	sharp_curved	9.40816	-0.428571	7.63265	0.571429	1.69388	-0.387755	1.5102	-2.87755	0256	frontal
22	021s4.jpg	remote control	sharp	No_Shaded	computer	16.8	0	0	1	2	curved_sharp	9.40816	-0.428571	7.63265	0.571429	1.69388	-0.387755	1.5102	-2.87755	0214	three_four
22	008s1.jpg	mirror	sharp	No_Shaded	computer	58.8	0	0	1	2	sharp_curved	9.40816	-0.428571	7.63265	0.571429	1.69388	-0.387755	1.5102	-2.87755	0081	three_four
22	010a1.jpg	handbag	curved	No_Shaded	computer	23.2	1	0	0	1	sharp_curved	9.40816	-0.428571	7.63265	0.571429	1.69388	-0.387755	1.5102	-2.87755	0101	frontal
22	033s3.jpg	toaster	sharp	No_Shaded	hand	28	1	0	0	1	curved_sharp	9.40816	-0.428571	7.63265	0.571429	1.69388	-0.387755	1.5102	-2.87755	0333	three_four
22	050a4.jpg	coffee maker	curved	No_Shaded	computer	48.4	0	1	0	3	sharp_curved	9.40816	-0.428571	7.63265	0.571429	1.69388	-0.387755	1.5102	-2.87755	0504	frontal
22	039a1.jpg	coffee maker	curved	Shaded	hand	32.2	0	1	0	3	curved_sharp	9.40816	-0.428571	7.63265	0.571429	1.69388	-0.387755	1.5102	-2.87755	0391	frontal
22	022s3.jpg	mobile phone	sharp	Shaded	hand	96	1	0	0	1	sharp_curved	9.40816	-0.428571	7.63265	0.571429	1.69388	-0.387755	1.5102	-2.87755	0223	three_four
22	052s2.jpg	photo frame	sharp	No_Shaded	computer	50.8	0	0	1	2	curved_sharp	9.40816	-0.428571	7.63265	0.571429	1.69388	-0.387755	1.5102	-2.87755	0522	three_four
22	017s5.jpg	headphones	sharp	No_Shaded	hand	22.4	1	0	0	1	sharp_curved	9.40816	-0.428571	7.63265	0.571429	1.69388	-0.387755	1.5102	-2.87755	0175	frontal
22	010s6.jpg	mirror	sharp	No_Shaded	computer	35.4	1	0	0	1	sharp_curved	9.40816	-0.428571	7.63265	0.571429	1.69388	-0.387755	1.5102	-2.87755	0106	frontal
22	040a5.jpg	watch	curved	Shaded	hand	64.4	0	1	0	3	curved_sharp	9.40816	-0.428571	7.63265	0.571429	1.69388	-0.387755	1.5102	-2.87755	0405	three_four
22	034a3.jpg	handle	curved	Shaded	hand	31	1	0	0	1	sharp_curved	9.40816	-0.428571	7.63265	0.571429	1.69388	-0.387755	1.5102	-2.87755	0343	frontal
22	025a5.jpg	glasses	curved	No_Shaded	hand	75.8	1	0	0	1	curved_sharp	9.40816	-0.428571	7.63265	0.571429	1.69388	-0.387755	1.5102	-2.87755	0255	three_four
22	034a4.jpg	sponge	curved	Shaded	hand	37.8	1	0	0	1	curved_sharp	9.40816	-0.428571	7.63265	0.571429	1.69388	-0.387755	1.5102	-2.87755	0344	three_four
22	021s3.jpg	toaster	sharp	No_Shaded	computer	11.6	1	0	0	1	sharp_curved	9.40816	-0.428571	7.63265	0.571429	1.69388	-0.387755	1.5102	-2.87755	0213	three_four
22	022s4.jpg	glass/cup	sharp	Shaded	hand	100	1	0	0	1	curved_sharp	9.40816	-0.428571	7.63265	0.571429	1.69388	-0.387755	1.5102	-2.87755	0224	frontal
22	050s4.jpg	coffee maker	sharp	No_Shaded	computer	47.8	0	1	0	3	sharp_curved	9.40816	-0.428571	7.63265	0.571429	1.69388	-0.387755	1.5102	-2.87755	0504	frontal
22	016a4.jpg	lightbulb	curved	No_Shaded	hand	82.6	1	0	0	1	curved_sharp	9.40816	-0.428571	7.63265	0.571429	1.69388	-0.387755	1.5102	-2.87755	0164	frontal
23	040s2.jpg	scissors	sharp	Shaded	hand	26.4	1	0	0	1	sharp_curved	-3.59184	-0.428571	-9.36735	-3.42857	1.69388	-0.387755	-1.4898	-5.87755	0402	three_four
23	052s2.jpg	photo frame	sharp	No_Shaded	computer	73.8	0	0	1	2	curved_sharp	-3.59184	-0.428571	-9.36735	-3.42857	1.69388	-0.387755	-1.4898	-5.87755	0522	three_four
23	002a5.jpg	umbrella	curved	No_Shaded	hand	99.6	1	0	0	1	sharp_curved	-3.59184	-0.428571	-9.36735	-3.42857	1.69388	-0.387755	-1.4898	-5.87755	0025	frontal
23	025a4.jpg	handle	curved	No_Shaded	hand	2.6	0	0	1	2	curved_sharp	-3.59184	-0.428571	-9.36735	-3.42857	1.69388	-0.387755	-1.4898	-5.87755	0254	frontal
23	049s2.jpg	tv	sharp	No_Shaded	hand	50.6	1	0	0	1	sharp_curved	-3.59184	-0.428571	-9.36735	-3.42857	1.69388	-0.387755	-1.4898	-5.87755	0492	frontal
23	012a6.jpg	door	curved	No_Shaded	hand	96.2	0	0	1	2	sharp_curved	-3.59184	-0.428571	-9.36735	-3.42857	1.69388	-0.387755	-1.4898	-5.87755	0126	frontal
23	001a3.jpg	pen	curved	No_Shaded	computer	10.2	0	0	1	2	sharp_curved	-3.59184	-0.428571	-9.36735	-3.42857	1.69388	-0.387755	-1.4898	-5.87755	0013	three_four
23	010a4.jpg	clock	curved	No_Shaded	computer	14.8	0	1	0	3	sharp_curved	-3.59184	-0.428571	-9.36735	-3.42857	1.69388	-0.387755	-1.4898	-5.87755	0104	frontal
23	049a1.jpg	backpack	curved	No_Shaded	hand	12.4	0	0	1	2	curved_sharp	-3.59184	-0.428571	-9.36735	-3.42857	1.69388	-0.387755	-1.4898	-5.87755	0491	three_four
23	039s1.jpg	coffee maker	sharp	Shaded	hand	72.6	0	1	0	3	sharp_curved	-3.59184	-0.428571	-9.36735	-3.42857	1.69388	-0.387755	-1.4898	-5.87755	0391	frontal
23	034s1.jpg	jug	sharp	Shaded	hand	93.4	0	1	0	3	curved_sharp	-3.59184	-0.428571	-9.36735	-3.42857	1.69388	-0.387755	-1.4898	-5.87755	0341	frontal
23	034s3.jpg	handle	sharp	Shaded	hand	50.4	0	1	0	3	curved_sharp	-3.59184	-0.428571	-9.36735	-3.42857	1.69388	-0.387755	-1.4898	-5.87755	0343	frontal
23	008a1.jpg	mirror	curved	No_Shaded	computer	3.2	0	0	1	2	curved_sharp	-3.59184	-0.428571	-9.36735	-3.42857	1.69388	-0.387755	-1.4898	-5.87755	0081	three_four
23	039a3.jpg	glass	curved	Shaded	hand	92.2	0	1	0	3	sharp_curved	-3.59184	-0.428571	-9.36735	-3.42857	1.69388	-0.387755	-1.4898	-5.87755	0393	frontal
23	021a3.jpg	toaster	curved	No_Shaded	computer	36.6	0	1	0	3	sharp_curved	-3.59184	-0.428571	-9.36735	-3.42857	1.69388	-0.387755	-1.4898	-5.87755	0213	three_four
23	025a6.jpg	comb	curved	No_Shaded	hand	23	1	0	0	1	sharp_curved	-3.59184	-0.428571	-9.36735	-3.42857	1.69388	-0.387755	-1.4898	-5.87755	0256	frontal
23	019s5.jpg	tap	sharp	Shaded	computer	47.2	0	0	1	2	sharp_curved	-3.59184	-0.428571	-9.36735	-3.42857	1.69388	-0.387755	-1.4898	-5.87755	0195	three_four
23	033a3.jpg	toaster	curved	No_Shaded	hand	82.8	0	1	0	3	curved_sharp	-3.59184	-0.428571	-9.36735	-3.42857	1.69388	-0.387755	-1.4898	-5.87755	0333	three_four
23	027s2.jpg	electric guitar	sharp	No_Shaded	computer	62.8	1	0	0	1	sharp_curved	-3.59184	-0.428571	-9.36735	-3.42857	1.69388	-0.387755	-1.4898	-5.87755	0272	frontal
23	017s1.jpg	lighter	sharp	Shaded	hand	0.8	1	0	0	1	sharp_curved	-3.59184	-0.428571	-9.36735	-3.42857	1.69388	-0.387755	-1.4898	-5.87755	0171	three_four
23	016a6.jpg	watch	curved	No_Shaded	hand	38.2	0	1	0	3	curved_sharp	-3.59184	-0.428571	-9.36735	-3.42857	1.69388	-0.387755	-1.4898	-5.87755	0166	frontal
23	050s5.jpg	tvmonitor	sharp	No_Shaded	computer	85.2	0	1	0	3	curved_sharp	-3.59184	-0.428571	-9.36735	-3.42857	1.69388	-0.387755	-1.4898	-5.87755	0505	frontal
23	039s3.jpg	glass	sharp	Shaded	hand	47.6	0	1	0	3	sharp_curved	-3.59184	-0.428571	-9.36735	-3.42857	1.69388	-0.387755	-1.4898	-5.87755	0393	frontal
23	022s3.jpg	mobile phone	sharp	Shaded	hand	93.6	0	1	0	3	curved_sharp	-3.59184	-0.428571	-9.36735	-3.42857	1.69388	-0.387755	-1.4898	-5.87755	0223	three_four
23	010s7.jpg	remote control	sharp	No_Shaded	hand	5	1	0	0	1	sharp_curved	-3.59184	-0.428571	-9.36735	-3.42857	1.69388	-0.387755	-1.4898	-5.87755	0107	three_four
23	022a4.jpg	glass/cup	curved	Shaded	hand	97.4	1	0	0	1	curved_sharp	-3.59184	-0.428571	-9.36735	-3.42857	1.69388	-0.387755	-1.4898	-5.87755	0224	frontal
23	010a6.jpg	mirror	curved	No_Shaded	computer	28	0	0	1	2	sharp_curved	-3.59184	-0.428571	-9.36735	-3.42857	1.69388	-0.387755	-1.4898	-5.87755	0106	frontal
23	010s1.jpg	handbag	sharp	No_Shaded	computer	16.2	1	0	0	1	curved_sharp	-3.59184	-0.428571	-9.36735	-3.42857	1.69388	-0.387755	-1.4898	-5.87755	0101	frontal
23	040a5.jpg	watch	curved	Shaded	hand	58.2	0	1	0	3	curved_sharp	-3.59184	-0.428571	-9.36735	-3.42857	1.69388	-0.387755	-1.4898	-5.87755	0405	three_four
23	021a4.jpg	remote control	curved	No_Shaded	computer	95.4	1	0	0	1	sharp_curved	-3.59184	-0.428571	-9.36735	-3.42857	1.69388	-0.387755	-1.4898	-5.87755	0214	three_four
23	040a7.jpg	pencil sharpener	curved	Shaded	hand	88.8	0	1	0	3	curved_sharp	-3.59184	-0.428571	-9.36735	-3.42857	1.69388	-0.387755	-1.4898	-5.87755	0407	three_four
23	034a6.jpg	radio	curved	Shaded	hand	100	0	1	0	3	curved_sharp	-3.59184	-0.428571	-9.36735	-3.42857	1.69388	-0.387755	-1.4898	-5.87755	0346	frontal
23	001s3.jpg	pen	sharp	No_Shaded	computer	3.8	0	0	1	2	sharp_curved	-3.59184	-0.428571	-9.36735	-3.42857	1.69388	-0.387755	-1.4898	-5.87755	0013	three_four
23	014s5.jpg	cap	sharp	No_Shaded	hand	93.2	1	0	0	1	curved_sharp	-3.59184	-0.428571	-9.36735	-3.42857	1.69388	-0.387755	-1.4898	-5.87755	0145	three_four
23	017s5.jpg	headphones	sharp	No_Shaded	hand	98.8	0	1	0	3	curved_sharp	-3.59184	-0.428571	-9.36735	-3.42857	1.69388	-0.387755	-1.4898	-5.87755	0175	frontal
23	040a2.jpg	scissors	curved	Shaded	hand	10.6	1	0	0	1	sharp_curved	-3.59184	-0.428571	-9.36735	-3.42857	1.69388	-0.387755	-1.4898	-5.87755	0402	three_four
23	049a2.jpg	tv	curved	No_Shaded	hand	80.2	1	0	0	1	sharp_curved	-3.59184	-0.428571	-9.36735	-3.42857	1.69388	-0.387755	-1.4898	-5.87755	0492	frontal
23	008s1.jpg	mirror	sharp	No_Shaded	computer	86.6	0	0	1	2	curved_sharp	-3.59184	-0.428571	-9.36735	-3.42857	1.69388	-0.387755	-1.4898	-5.87755	0081	three_four
23	014a5.jpg	cap	curved	No_Shaded	hand	91.6	1	0	0	1	curved_sharp	-3.59184	-0.428571	-9.36735	-3.42857	1.69388	-0.387755	-1.4898	-5.87755	0145	three_four
23	040s6.jpg	chair	sharp	Shaded	hand	95	0	0	1	2	sharp_curved	-3.59184	-0.428571	-9.36735	-3.42857	1.69388	-0.387755	-1.4898	-5.87755	0406	three_four
23	034a4.jpg	sponge	curved	Shaded	hand	5.6	0	0	1	2	sharp_curved	-3.59184	-0.428571	-9.36735	-3.42857	1.69388	-0.387755	-1.4898	-5.87755	0344	three_four
23	012s6.jpg	door	sharp	No_Shaded	hand	95.2	0	0	1	2	sharp_curved	-3.59184	-0.428571	-9.36735	-3.42857	1.69388	-0.387755	-1.4898	-5.87755	0126	frontal
23	050a4.jpg	coffee maker	curved	No_Shaded	computer	90.2	0	1	0	3	curved_sharp	-3.59184	-0.428571	-9.36735	-3.42857	1.69388	-0.387755	-1.4898	-5.87755	0504	frontal
23	027a2.jpg	electric guitar	curved	No_Shaded	computer	62.4	1	0	0	1	sharp_curved	-3.59184	-0.428571	-9.36735	-3.42857	1.69388	-0.387755	-1.4898	-5.87755	0272	frontal
23	040s7.jpg	pencil sharpener	sharp	Shaded	hand	94.4	0	1	0	3	curved_sharp	-3.59184	-0.428571	-9.36735	-3.42857	1.69388	-0.387755	-1.4898	-5.87755	0407	three_four
23	040s5.jpg	watch	sharp	Shaded	hand	84.8	0	1	0	3	curved_sharp	-3.59184	-0.428571	-9.36735	-3.42857	1.69388	-0.387755	-1.4898	-5.87755	0405	three_four
23	049s4.jpg	lamp	sharp	No_Shaded	hand	89.6	0	1	0	3	curved_sharp	-3.59184	-0.428571	-9.36735	-3.42857	1.69388	-0.387755	-1.4898	-5.87755	0494	frontal
23	017a1.jpg	lighter	curved	Shaded	hand	12.6	1	0	0	1	sharp_curved	-3.59184	-0.428571	-9.36735	-3.42857	1.69388	-0.387755	-1.4898	-5.87755	0171	three_four
23	022s4.jpg	glass/cup	sharp	Shaded	hand	31.8	1	0	0	1	curved_sharp	-3.59184	-0.428571	-9.36735	-3.42857	1.69388	-0.387755	-1.4898	-5.87755	0224	frontal
23	025s5.jpg	glasses	sharp	No_Shaded	hand	8.2	1	0	0	1	sharp_curved	-3.59184	-0.428571	-9.36735	-3.42857	1.69388	-0.387755	-1.4898	-5.87755	0255	three_four
23	010a7.jpg	remote control	curved	No_Shaded	hand	6	1	0	0	1	sharp_curved	-3.59184	-0.428571	-9.36735	-3.42857	1.69388	-0.387755	-1.4898	-5.87755	0107	three_four
23	034s4.jpg	sponge	sharp	Shaded	hand	94.2	0	0	1	2	sharp_curved	-3.59184	-0.428571	-9.36735	-3.42857	1.69388	-0.387755	-1.4898	-5.87755	0344	three_four
23	002a3.jpg	lamp	curved	No_Shaded	hand	97.4	0	1	0	3	curved_sharp	-3.59184	-0.428571	-9.36735	-3.42857	1.69388	-0.387755	-1.4898	-5.87755	0023	three_four
23	019a5.jpg	tap	curved	Shaded	computer	50.4	0	0	1	2	sharp_curved	-3.59184	-0.428571	-9.36735	-3.42857	1.69388	-0.387755	-1.4898	-5.87755	0195	three_four
23	016a4.jpg	lightbulb	curved	No_Shaded	hand	97.2	1	0	0	1	sharp_curved	-3.59184	-0.428571	-9.36735	-3.42857	1.69388	-0.387755	-1.4898	-5.87755	0164	frontal
23	034a1.jpg	jug	curved	Shaded	hand	4.6	0	1	0	3	curved_sharp	-3.59184	-0.428571	-9.36735	-3.42857	1.69388	-0.387755	-1.4898	-5.87755	0341	frontal
23	050s7.jpg	mobile phone	sharp	No_Shaded	computer	96	0	1	0	3	sharp_curved	-3.59184	-0.428571	-9.36735	-3.42857	1.69388	-0.387755	-1.4898	-5.87755	0507	frontal
23	021s4.jpg	remote control	sharp	No_Shaded	computer	93.8	1	0	0	1	sharp_curved	-3.59184	-0.428571	-9.36735	-3.42857	1.69388	-0.387755	-1.4898	-5.87755	0214	three_four
23	001a1.jpg	hat	curved	No_Shaded	computer	17.2	0	0	1	2	curved_sharp	-3.59184	-0.428571	-9.36735	-3.42857	1.69388	-0.387755	-1.4898	-5.87755	0011	three_four
23	017a5.jpg	headphones	curved	No_Shaded	hand	83.4	0	1	0	3	curved_sharp	-3.59184	-0.428571	-9.36735	-3.42857	1.69388	-0.387755	-1.4898	-5.87755	0175	frontal
23	002s5.jpg	umbrella	sharp	No_Shaded	hand	6.8	1	0	0	1	sharp_curved	-3.59184	-0.428571	-9.36735	-3.42857	1.69388	-0.387755	-1.4898	-5.87755	0025	frontal
23	016s6.jpg	watch	sharp	No_Shaded	hand	5.4	0	1	0	3	curved_sharp	-3.59184	-0.428571	-9.36735	-3.42857	1.69388	-0.387755	-1.4898	-5.87755	0166	frontal
23	022a3.jpg	mobile phone	curved	Shaded	hand	85.4	0	1	0	3	curved_sharp	-3.59184	-0.428571	-9.36735	-3.42857	1.69388	-0.387755	-1.4898	-5.87755	0223	three_four
23	001s1.jpg	hat	sharp	No_Shaded	computer	17.8	0	0	1	2	curved_sharp	-3.59184	-0.428571	-9.36735	-3.42857	1.69388	-0.387755	-1.4898	-5.87755	0011	three_four
23	025a5.jpg	glasses	curved	No_Shaded	hand	97.6	1	0	0	1	sharp_curved	-3.59184	-0.428571	-9.36735	-3.42857	1.69388	-0.387755	-1.4898	-5.87755	0255	three_four
23	034a3.jpg	handle	curved	Shaded	hand	2.2	0	1	0	3	curved_sharp	-3.59184	-0.428571	-9.36735	-3.42857	1.69388	-0.387755	-1.4898	-5.87755	0343	frontal
23	021s3.jpg	toaster	sharp	No_Shaded	computer	100	0	1	0	3	sharp_curved	-3.59184	-0.428571	-9.36735	-3.42857	1.69388	-0.387755	-1.4898	-5.87755	0213	three_four
23	052a2.jpg	photo frame	curved	No_Shaded	computer	100	0	0	1	2	curved_sharp	-3.59184	-0.428571	-9.36735	-3.42857	1.69388	-0.387755	-1.4898	-5.87755	0522	three_four
23	033s6.jpg	teapot	sharp	No_Shaded	hand	2.4	1	0	0	1	sharp_curved	-3.59184	-0.428571	-9.36735	-3.42857	1.69388	-0.387755	-1.4898	-5.87755	0336	frontal
23	019s4.jpg	duct tape	sharp	Shaded	computer	99.2	0	1	0	3	curved_sharp	-3.59184	-0.428571	-9.36735	-3.42857	1.69388	-0.387755	-1.4898	-5.87755	0194	three_four
23	034s6.jpg	radio	sharp	Shaded	hand	99.6	0	1	0	3	curved_sharp	-3.59184	-0.428571	-9.36735	-3.42857	1.69388	-0.387755	-1.4898	-5.87755	0346	frontal
23	010s6.jpg	mirror	sharp	No_Shaded	computer	80.4	0	0	1	2	sharp_curved	-3.59184	-0.428571	-9.36735	-3.42857	1.69388	-0.387755	-1.4898	-5.87755	0106	frontal
23	039a1.jpg	coffee maker	curved	Shaded	hand	6.2	0	1	0	3	sharp_curved	-3.59184	-0.428571	-9.36735	-3.42857	1.69388	-0.387755	-1.4898	-5.87755	0391	frontal
23	033a6.jpg	teapot	curved	No_Shaded	hand	7	1	0	0	1	sharp_curved	-3.59184	-0.428571	-9.36735	-3.42857	1.69388	-0.387755	-1.4898	-5.87755	0336	frontal
23	049a4.jpg	lamp	curved	No_Shaded	hand	94.8	0	1	0	3	curved_sharp	-3.59184	-0.428571	-9.36735	-3.42857	1.69388	-0.387755	-1.4898	-5.87755	0494	frontal
23	025s6.jpg	comb	sharp	No_Shaded	hand	16.4	1	0	0	1	sharp_curved	-3.59184	-0.428571	-9.36735	-3.42857	1.69388	-0.387755	-1.4898	-5.87755	0256	frontal
23	010a1.jpg	handbag	curved	No_Shaded	computer	6.2	1	0	0	1	curved_sharp	-3.59184	-0.428571	-9.36735	-3.42857	1.69388	-0.387755	-1.4898	-5.87755	0101	frontal
23	040a6.jpg	chair	curved	Shaded	hand	49.6	0	0	1	2	sharp_curved	-3.59184	-0.428571	-9.36735	-3.42857	1.69388	-0.387755	-1.4898	-5.87755	0406	three_four
23	010s4.jpg	clock	sharp	No_Shaded	computer	82.2	0	1	0	3	sharp_curved	-3.59184	-0.428571	-9.36735	-3.42857	1.69388	-0.387755	-1.4898	-5.87755	0104	frontal
23	033s3.jpg	toaster	sharp	No_Shaded	hand	19.4	0	1	0	3	curved_sharp	-3.59184	-0.428571	-9.36735	-3.42857	1.69388	-0.387755	-1.4898	-5.87755	0333	three_four
23	050a7.jpg	mobile phone	curved	No_Shaded	computer	89.4	0	1	0	3	sharp_curved	-3.59184	-0.428571	-9.36735	-3.42857	1.69388	-0.387755	-1.4898	-5.87755	0507	frontal
23	010s3.jpg	glasses	sharp	No_Shaded	hand	55	1	0	0	1	curved_sharp	-3.59184	-0.428571	-9.36735	-3.42857	1.69388	-0.387755	-1.4898	-5.87755	0103	frontal
23	050s4.jpg	coffee maker	sharp	No_Shaded	computer	91.2	0	1	0	3	curved_sharp	-3.59184	-0.428571	-9.36735	-3.42857	1.69388	-0.387755	-1.4898	-5.87755	0504	frontal
23	019a4.jpg	duct tape	curved	Shaded	computer	13.8	0	1	0	3	curved_sharp	-3.59184	-0.428571	-9.36735	-3.42857	1.69388	-0.387755	-1.4898	-5.87755	0194	three_four
23	025s4.jpg	handle	sharp	No_Shaded	hand	92.4	0	0	1	2	curved_sharp	-3.59184	-0.428571	-9.36735	-3.42857	1.69388	-0.387755	-1.4898	-5.87755	0254	frontal
23	002s3.jpg	lamp	sharp	No_Shaded	hand	85.4	0	1	0	3	curved_sharp	-3.59184	-0.428571	-9.36735	-3.42857	1.69388	-0.387755	-1.4898	-5.87755	0023	three_four
23	050a5.jpg	tvmonitor	curved	No_Shaded	computer	96.6	0	1	0	3	curved_sharp	-3.59184	-0.428571	-9.36735	-3.42857	1.69388	-0.387755	-1.4898	-5.87755	0505	frontal
23	010a3.jpg	glasses	curved	No_Shaded	hand	13.8	1	0	0	1	curved_sharp	-3.59184	-0.428571	-9.36735	-3.42857	1.69388	-0.387755	-1.4898	-5.87755	0103	frontal
23	016s4.jpg	lightbulb	sharp	No_Shaded	hand	3	1	0	0	1	sharp_curved	-3.59184	-0.428571	-9.36735	-3.42857	1.69388	-0.387755	-1.4898	-5.87755	0164	frontal
23	049s1.jpg	backpack	sharp	No_Shaded	hand	12.2	0	0	1	2	curved_sharp	-3.59184	-0.428571	-9.36735	-3.42857	1.69388	-0.387755	-1.4898	-5.87755	0491	three_four
24	040s6.jpg	chair	sharp	Shaded	hand	14.4	1	0	0	1	curved_sharp	-4.59184	-0.428571	-6.36735	-0.428571	-1.30612	-0.387755	1.5102	4.12245	0406	three_four
24	049a4.jpg	lamp	curved	No_Shaded	hand	19	0	1	0	3	sharp_curved	-4.59184	-0.428571	-6.36735	-0.428571	-1.30612	-0.387755	1.5102	4.12245	0494	frontal
24	002s5.jpg	umbrella	sharp	No_Shaded	hand	31	0	0	1	2	curved_sharp	-4.59184	-0.428571	-6.36735	-0.428571	-1.30612	-0.387755	1.5102	4.12245	0025	frontal
24	016s6.jpg	watch	sharp	No_Shaded	hand	9.8	1	0	0	1	sharp_curved	-4.59184	-0.428571	-6.36735	-0.428571	-1.30612	-0.387755	1.5102	4.12245	0166	frontal
24	010a6.jpg	mirror	curved	No_Shaded	computer	20.6	0	1	0	3	curved_sharp	-4.59184	-0.428571	-6.36735	-0.428571	-1.30612	-0.387755	1.5102	4.12245	0106	frontal
24	040a2.jpg	scissors	curved	Shaded	hand	12.2	1	0	0	1	curved_sharp	-4.59184	-0.428571	-6.36735	-0.428571	-1.30612	-0.387755	1.5102	4.12245	0402	three_four
24	014s5.jpg	cap	sharp	No_Shaded	hand	67.2	0	0	1	2	sharp_curved	-4.59184	-0.428571	-6.36735	-0.428571	-1.30612	-0.387755	1.5102	4.12245	0145	three_four
24	040a5.jpg	watch	curved	Shaded	hand	99.6	1	0	0	1	sharp_curved	-4.59184	-0.428571	-6.36735	-0.428571	-1.30612	-0.387755	1.5102	4.12245	0405	three_four
24	025a5.jpg	glasses	curved	No_Shaded	hand	49.4	1	0	0	1	sharp_curved	-4.59184	-0.428571	-6.36735	-0.428571	-1.30612	-0.387755	1.5102	4.12245	0255	three_four
24	016s4.jpg	lightbulb	sharp	No_Shaded	hand	0.6	1	0	0	1	sharp_curved	-4.59184	-0.428571	-6.36735	-0.428571	-1.30612	-0.387755	1.5102	4.12245	0164	frontal
24	010a4.jpg	clock	curved	No_Shaded	computer	48.4	1	0	0	1	sharp_curved	-4.59184	-0.428571	-6.36735	-0.428571	-1.30612	-0.387755	1.5102	4.12245	0104	frontal
24	050s7.jpg	mobile phone	sharp	No_Shaded	computer	50.6	1	0	0	1	curved_sharp	-4.59184	-0.428571	-6.36735	-0.428571	-1.30612	-0.387755	1.5102	4.12245	0507	frontal
24	008s1.jpg	mirror	sharp	No_Shaded	computer	53	0	0	1	2	sharp_curved	-4.59184	-0.428571	-6.36735	-0.428571	-1.30612	-0.387755	1.5102	4.12245	0081	three_four
24	050s5.jpg	tvmonitor	sharp	No_Shaded	computer	62.6	0	0	1	2	curved_sharp	-4.59184	-0.428571	-6.36735	-0.428571	-1.30612	-0.387755	1.5102	4.12245	0505	frontal
24	034s6.jpg	radio	sharp	Shaded	hand	97.4	0	1	0	3	curved_sharp	-4.59184	-0.428571	-6.36735	-0.428571	-1.30612	-0.387755	1.5102	4.12245	0346	frontal
24	050a4.jpg	coffee maker	curved	No_Shaded	computer	50.6	0	0	1	2	curved_sharp	-4.59184	-0.428571	-6.36735	-0.428571	-1.30612	-0.387755	1.5102	4.12245	0504	frontal
24	017a1.jpg	lighter	curved	Shaded	hand	81.4	1	0	0	1	sharp_curved	-4.59184	-0.428571	-6.36735	-0.428571	-1.30612	-0.387755	1.5102	4.12245	0171	three_four
24	049a2.jpg	tv	curved	No_Shaded	hand	36.8	0	1	0	3	curved_sharp	-4.59184	-0.428571	-6.36735	-0.428571	-1.30612	-0.387755	1.5102	4.12245	0492	frontal
24	010s3.jpg	glasses	sharp	No_Shaded	hand	14.8	0	0	1	2	sharp_curved	-4.59184	-0.428571	-6.36735	-0.428571	-1.30612	-0.387755	1.5102	4.12245	0103	frontal
24	034a3.jpg	handle	curved	Shaded	hand	21	0	1	0	3	curved_sharp	-4.59184	-0.428571	-6.36735	-0.428571	-1.30612	-0.387755	1.5102	4.12245	0343	frontal
24	012s6.jpg	door	sharp	No_Shaded	hand	19.6	0	1	0	3	curved_sharp	-4.59184	-0.428571	-6.36735	-0.428571	-1.30612	-0.387755	1.5102	4.12245	0126	frontal
24	010s4.jpg	clock	sharp	No_Shaded	computer	55.4	1	0	0	1	sharp_curved	-4.59184	-0.428571	-6.36735	-0.428571	-1.30612	-0.387755	1.5102	4.12245	0104	frontal
24	019a4.jpg	duct tape	curved	Shaded	computer	97.8	0	0	1	2	curved_sharp	-4.59184	-0.428571	-6.36735	-0.428571	-1.30612	-0.387755	1.5102	4.12245	0194	three_four
24	025a6.jpg	comb	curved	No_Shaded	hand	13.8	1	0	0	1	curved_sharp	-4.59184	-0.428571	-6.36735	-0.428571	-1.30612	-0.387755	1.5102	4.12245	0256	frontal
24	001a3.jpg	pen	curved	No_Shaded	computer	99.6	1	0	0	1	sharp_curved	-4.59184	-0.428571	-6.36735	-0.428571	-1.30612	-0.387755	1.5102	4.12245	0013	three_four
24	033s3.jpg	toaster	sharp	No_Shaded	hand	31.2	0	0	1	2	sharp_curved	-4.59184	-0.428571	-6.36735	-0.428571	-1.30612	-0.387755	1.5102	4.12245	0333	three_four
24	022s3.jpg	mobile phone	sharp	Shaded	hand	100	1	0	0	1	sharp_curved	-4.59184	-0.428571	-6.36735	-0.428571	-1.30612	-0.387755	1.5102	4.12245	0223	three_four
24	025a4.jpg	handle	curved	No_Shaded	hand	25	0	0	1	2	curved_sharp	-4.59184	-0.428571	-6.36735	-0.428571	-1.30612	-0.387755	1.5102	4.12245	0254	frontal
24	022s4.jpg	glass/cup	sharp	Shaded	hand	99.8	1	0	0	1	sharp_curved	-4.59184	-0.428571	-6.36735	-0.428571	-1.30612	-0.387755	1.5102	4.12245	0224	frontal
24	040a6.jpg	chair	curved	Shaded	hand	16.8	1	0	0	1	curved_sharp	-4.59184	-0.428571	-6.36735	-0.428571	-1.30612	-0.387755	1.5102	4.12245	0406	three_four
24	050a7.jpg	mobile phone	curved	No_Shaded	computer	48.8	1	0	0	1	curved_sharp	-4.59184	-0.428571	-6.36735	-0.428571	-1.30612	-0.387755	1.5102	4.12245	0507	frontal
24	002a5.jpg	umbrella	curved	No_Shaded	hand	6.2	0	0	1	2	curved_sharp	-4.59184	-0.428571	-6.36735	-0.428571	-1.30612	-0.387755	1.5102	4.12245	0025	frontal
24	010a3.jpg	glasses	curved	No_Shaded	hand	5.6	0	0	1	2	sharp_curved	-4.59184	-0.428571	-6.36735	-0.428571	-1.30612	-0.387755	1.5102	4.12245	0103	frontal
24	052s2.jpg	photo frame	sharp	No_Shaded	computer	74.2	0	0	1	2	curved_sharp	-4.59184	-0.428571	-6.36735	-0.428571	-1.30612	-0.387755	1.5102	4.12245	0522	three_four
24	034s4.jpg	sponge	sharp	Shaded	hand	16.6	0	1	0	3	sharp_curved	-4.59184	-0.428571	-6.36735	-0.428571	-1.30612	-0.387755	1.5102	4.12245	0344	three_four
24	039s3.jpg	glass	sharp	Shaded	hand	16.4	1	0	0	1	curved_sharp	-4.59184	-0.428571	-6.36735	-0.428571	-1.30612	-0.387755	1.5102	4.12245	0393	frontal
24	039s1.jpg	coffee maker	sharp	Shaded	hand	25.4	0	1	0	3	curved_sharp	-4.59184	-0.428571	-6.36735	-0.428571	-1.30612	-0.387755	1.5102	4.12245	0391	frontal
24	033a3.jpg	toaster	curved	No_Shaded	hand	21	0	0	1	2	sharp_curved	-4.59184	-0.428571	-6.36735	-0.428571	-1.30612	-0.387755	1.5102	4.12245	0333	three_four
24	012a6.jpg	door	curved	No_Shaded	hand	15	0	1	0	3	curved_sharp	-4.59184	-0.428571	-6.36735	-0.428571	-1.30612	-0.387755	1.5102	4.12245	0126	frontal
24	033s6.jpg	teapot	sharp	No_Shaded	hand	0.8	1	0	0	1	sharp_curved	-4.59184	-0.428571	-6.36735	-0.428571	-1.30612	-0.387755	1.5102	4.12245	0336	frontal
24	049s2.jpg	tv	sharp	No_Shaded	hand	14.4	0	1	0	3	curved_sharp	-4.59184	-0.428571	-6.36735	-0.428571	-1.30612	-0.387755	1.5102	4.12245	0492	frontal
24	010s1.jpg	handbag	sharp	No_Shaded	computer	10.6	0	0	1	2	sharp_curved	-4.59184	-0.428571	-6.36735	-0.428571	-1.30612	-0.387755	1.5102	4.12245	0101	frontal
24	040a7.jpg	pencil sharpener	curved	Shaded	hand	87.4	0	1	0	3	sharp_curved	-4.59184	-0.428571	-6.36735	-0.428571	-1.30612	-0.387755	1.5102	4.12245	0407	three_four
24	034a6.jpg	radio	curved	Shaded	hand	84	0	1	0	3	curved_sharp	-4.59184	-0.428571	-6.36735	-0.428571	-1.30612	-0.387755	1.5102	4.12245	0346	frontal
24	034a4.jpg	sponge	curved	Shaded	hand	15.4	0	1	0	3	sharp_curved	-4.59184	-0.428571	-6.36735	-0.428571	-1.30612	-0.387755	1.5102	4.12245	0344	three_four
24	021s4.jpg	remote control	sharp	No_Shaded	computer	64.2	0	0	1	2	curved_sharp	-4.59184	-0.428571	-6.36735	-0.428571	-1.30612	-0.387755	1.5102	4.12245	0214	three_four
24	052a2.jpg	photo frame	curved	No_Shaded	computer	59.2	0	0	1	2	curved_sharp	-4.59184	-0.428571	-6.36735	-0.428571	-1.30612	-0.387755	1.5102	4.12245	0522	three_four
24	019a5.jpg	tap	curved	Shaded	computer	40	0	1	0	3	sharp_curved	-4.59184	-0.428571	-6.36735	-0.428571	-1.30612	-0.387755	1.5102	4.12245	0195	three_four
24	050a5.jpg	tvmonitor	curved	No_Shaded	computer	38.6	0	0	1	2	curved_sharp	-4.59184	-0.428571	-6.36735	-0.428571	-1.30612	-0.387755	1.5102	4.12245	0505	frontal
24	027s2.jpg	electric guitar	sharp	No_Shaded	computer	72.8	1	0	0	1	sharp_curved	-4.59184	-0.428571	-6.36735	-0.428571	-1.30612	-0.387755	1.5102	4.12245	0272	frontal
24	040s7.jpg	pencil sharpener	sharp	Shaded	hand	85.4	0	1	0	3	sharp_curved	-4.59184	-0.428571	-6.36735	-0.428571	-1.30612	-0.387755	1.5102	4.12245	0407	three_four
24	040s2.jpg	scissors	sharp	Shaded	hand	11.4	1	0	0	1	curved_sharp	-4.59184	-0.428571	-6.36735	-0.428571	-1.30612	-0.387755	1.5102	4.12245	0402	three_four
24	001s3.jpg	pen	sharp	No_Shaded	computer	100	1	0	0	1	sharp_curved	-4.59184	-0.428571	-6.36735	-0.428571	-1.30612	-0.387755	1.5102	4.12245	0013	three_four
24	021a3.jpg	toaster	curved	No_Shaded	computer	84	0	1	0	3	sharp_curved	-4.59184	-0.428571	-6.36735	-0.428571	-1.30612	-0.387755	1.5102	4.12245	0213	three_four
24	010a7.jpg	remote control	curved	No_Shaded	hand	3.4	0	0	1	2	curved_sharp	-4.59184	-0.428571	-6.36735	-0.428571	-1.30612	-0.387755	1.5102	4.12245	0107	three_four
24	025s6.jpg	comb	sharp	No_Shaded	hand	61.6	1	0	0	1	curved_sharp	-4.59184	-0.428571	-6.36735	-0.428571	-1.30612	-0.387755	1.5102	4.12245	0256	frontal
24	002s3.jpg	lamp	sharp	No_Shaded	hand	25.6	1	0	0	1	curved_sharp	-4.59184	-0.428571	-6.36735	-0.428571	-1.30612	-0.387755	1.5102	4.12245	0023	three_four
24	019s4.jpg	duct tape	sharp	Shaded	computer	100	0	0	1	2	curved_sharp	-4.59184	-0.428571	-6.36735	-0.428571	-1.30612	-0.387755	1.5102	4.12245	0194	three_four
24	022a3.jpg	mobile phone	curved	Shaded	hand	100	1	0	0	1	sharp_curved	-4.59184	-0.428571	-6.36735	-0.428571	-1.30612	-0.387755	1.5102	4.12245	0223	three_four
24	017a5.jpg	headphones	curved	No_Shaded	hand	45.8	1	0	0	1	curved_sharp	-4.59184	-0.428571	-6.36735	-0.428571	-1.30612	-0.387755	1.5102	4.12245	0175	frontal
24	025s5.jpg	glasses	sharp	No_Shaded	hand	31.4	1	0	0	1	sharp_curved	-4.59184	-0.428571	-6.36735	-0.428571	-1.30612	-0.387755	1.5102	4.12245	0255	three_four
24	016a6.jpg	watch	curved	No_Shaded	hand	12.8	1	0	0	1	sharp_curved	-4.59184	-0.428571	-6.36735	-0.428571	-1.30612	-0.387755	1.5102	4.12245	0166	frontal
24	040s5.jpg	watch	sharp	Shaded	hand	100	1	0	0	1	sharp_curved	-4.59184	-0.428571	-6.36735	-0.428571	-1.30612	-0.387755	1.5102	4.12245	0405	three_four
24	010a1.jpg	handbag	curved	No_Shaded	computer	12.6	0	0	1	2	sharp_curved	-4.59184	-0.428571	-6.36735	-0.428571	-1.30612	-0.387755	1.5102	4.12245	0101	frontal
24	016a4.jpg	lightbulb	curved	No_Shaded	hand	8	1	0	0	1	sharp_curved	-4.59184	-0.428571	-6.36735	-0.428571	-1.30612	-0.387755	1.5102	4.12245	0164	frontal
24	049s1.jpg	backpack	sharp	No_Shaded	hand	24.4	0	0	1	2	sharp_curved	-4.59184	-0.428571	-6.36735	-0.428571	-1.30612	-0.387755	1.5102	4.12245	0491	three_four
24	050s4.jpg	coffee maker	sharp	No_Shaded	computer	34	0	0	1	2	curved_sharp	-4.59184	-0.428571	-6.36735	-0.428571	-1.30612	-0.387755	1.5102	4.12245	0504	frontal
24	017s1.jpg	lighter	sharp	Shaded	hand	35.4	1	0	0	1	sharp_curved	-4.59184	-0.428571	-6.36735	-0.428571	-1.30612	-0.387755	1.5102	4.12245	0171	three_four
24	019s5.jpg	tap	sharp	Shaded	computer	94.2	0	1	0	3	sharp_curved	-4.59184	-0.428571	-6.36735	-0.428571	-1.30612	-0.387755	1.5102	4.12245	0195	three_four
24	001a1.jpg	hat	curved	No_Shaded	computer	23.6	0	0	1	2	sharp_curved	-4.59184	-0.428571	-6.36735	-0.428571	-1.30612	-0.387755	1.5102	4.12245	0011	three_four
24	021a4.jpg	remote control	curved	No_Shaded	computer	26.6	0	0	1	2	curved_sharp	-4.59184	-0.428571	-6.36735	-0.428571	-1.30612	-0.387755	1.5102	4.12245	0214	three_four
24	049a1.jpg	backpack	curved	No_Shaded	hand	22.6	0	0	1	2	sharp_curved	-4.59184	-0.428571	-6.36735	-0.428571	-1.30612	-0.387755	1.5102	4.12245	0491	three_four
24	017s5.jpg	headphones	sharp	No_Shaded	hand	32.2	1	0	0	1	curved_sharp	-4.59184	-0.428571	-6.36735	-0.428571	-1.30612	-0.387755	1.5102	4.12245	0175	frontal
24	033a6.jpg	teapot	curved	No_Shaded	hand	2.4	1	0	0	1	sharp_curved	-4.59184	-0.428571	-6.36735	-0.428571	-1.30612	-0.387755	1.5102	4.12245	0336	frontal
24	034s1.jpg	jug	sharp	Shaded	hand	0	0	0	1	2	sharp_curved	-4.59184	-0.428571	-6.36735	-0.428571	-1.30612	-0.387755	1.5102	4.12245	0341	frontal
24	001s1.jpg	hat	sharp	No_Shaded	computer	14	0	0	1	2	sharp_curved	-4.59184	-0.428571	-6.36735	-0.428571	-1.30612	-0.387755	1.5102	4.12245	0011	three_four
24	025s4.jpg	handle	sharp	No_Shaded	hand	20.2	0	0	1	2	curved_sharp	-4.59184	-0.428571	-6.36735	-0.428571	-1.30612	-0.387755	1.5102	4.12245	0254	frontal
24	049s4.jpg	lamp	sharp	No_Shaded	hand	63.4	0	1	0	3	sharp_curved	-4.59184	-0.428571	-6.36735	-0.428571	-1.30612	-0.387755	1.5102	4.12245	0494	frontal
24	022a4.jpg	glass/cup	curved	Shaded	hand	100	1	0	0	1	sharp_curved	-4.59184	-0.428571	-6.36735	-0.428571	-1.30612	-0.387755	1.5102	4.12245	0224	frontal
24	021s3.jpg	toaster	sharp	No_Shaded	computer	29.4	0	1	0	3	sharp_curved	-4.59184	-0.428571	-6.36735	-0.428571	-1.30612	-0.387755	1.5102	4.12245	0213	three_four
24	034a1.jpg	jug	curved	Shaded	hand	46.4	0	0	1	2	sharp_curved	-4.59184	-0.428571	-6.36735	-0.428571	-1.30612	-0.387755	1.5102	4.12245	0341	frontal
24	002a3.jpg	lamp	curved	No_Shaded	hand	10.2	1	0	0	1	curved_sharp	-4.59184	-0.428571	-6.36735	-0.428571	-1.30612	-0.387755	1.5102	4.12245	0023	three_four
24	010s6.jpg	mirror	sharp	No_Shaded	computer	75.8	0	1	0	3	curved_sharp	-4.59184	-0.428571	-6.36735	-0.428571	-1.30612	-0.387755	1.5102	4.12245	0106	frontal
24	039a3.jpg	glass	curved	Shaded	hand	37.4	1	0	0	1	curved_sharp	-4.59184	-0.428571	-6.36735	-0.428571	-1.30612	-0.387755	1.5102	4.12245	0393	frontal
24	034s3.jpg	handle	sharp	Shaded	hand	14.4	0	1	0	3	curved_sharp	-4.59184	-0.428571	-6.36735	-0.428571	-1.30612	-0.387755	1.5102	4.12245	0343	frontal
24	010s7.jpg	remote control	sharp	No_Shaded	hand	15.6	0	0	1	2	curved_sharp	-4.59184	-0.428571	-6.36735	-0.428571	-1.30612	-0.387755	1.5102	4.12245	0107	three_four
24	008a1.jpg	mirror	curved	No_Shaded	computer	40.2	0	0	1	2	sharp_curved	-4.59184	-0.428571	-6.36735	-0.428571	-1.30612	-0.387755	1.5102	4.12245	0081	three_four
24	014a5.jpg	cap	curved	No_Shaded	hand	56	0	0	1	2	sharp_curved	-4.59184	-0.428571	-6.36735	-0.428571	-1.30612	-0.387755	1.5102	4.12245	0145	three_four
24	039a1.jpg	coffee maker	curved	Shaded	hand	34.4	0	1	0	3	curved_sharp	-4.59184	-0.428571	-6.36735	-0.428571	-1.30612	-0.387755	1.5102	4.12245	0391	frontal
24	027a2.jpg	electric guitar	curved	No_Shaded	computer	94	1	0	0	1	sharp_curved	-4.59184	-0.428571	-6.36735	-0.428571	-1.30612	-0.387755	1.5102	4.12245	0272	frontal
25	021s4.jpg	remote control	sharp	No_Shaded	computer	56	1	0	0	1	curved_sharp	5.40816	0.571429	-3.36735	-0.428571	4.69388	1.61224	-6.4898	0.122449	0214	three_four
25	008s1.jpg	mirror	sharp	No_Shaded	computer	89	0	0	1	2	sharp_curved	5.40816	0.571429	-3.36735	-0.428571	4.69388	1.61224	-6.4898	0.122449	0081	three_four
25	022a4.jpg	glass/cup	curved	Shaded	hand	53.6	1	0	0	1	curved_sharp	5.40816	0.571429	-3.36735	-0.428571	4.69388	1.61224	-6.4898	0.122449	0224	frontal
25	012a6.jpg	door	curved	No_Shaded	hand	41.8	0	1	0	3	curved_sharp	5.40816	0.571429	-3.36735	-0.428571	4.69388	1.61224	-6.4898	0.122449	0126	frontal
25	022s3.jpg	mobile phone	sharp	Shaded	hand	78.8	1	0	0	1	curved_sharp	5.40816	0.571429	-3.36735	-0.428571	4.69388	1.61224	-6.4898	0.122449	0223	three_four
25	021s3.jpg	toaster	sharp	No_Shaded	computer	32.4	0	1	0	3	sharp_curved	5.40816	0.571429	-3.36735	-0.428571	4.69388	1.61224	-6.4898	0.122449	0213	three_four
25	050a5.jpg	tvmonitor	curved	No_Shaded	computer	79.4	1	0	0	1	sharp_curved	5.40816	0.571429	-3.36735	-0.428571	4.69388	1.61224	-6.4898	0.122449	0505	frontal
25	049a4.jpg	lamp	curved	No_Shaded	hand	52.2	0	1	0	3	sharp_curved	5.40816	0.571429	-3.36735	-0.428571	4.69388	1.61224	-6.4898	0.122449	0494	frontal
25	052a2.jpg	photo frame	curved	No_Shaded	computer	80.8	0	0	1	2	curved_sharp	5.40816	0.571429	-3.36735	-0.428571	4.69388	1.61224	-6.4898	0.122449	0522	three_four
25	034a3.jpg	handle	curved	Shaded	hand	28.4	1	0	0	1	curved_sharp	5.40816	0.571429	-3.36735	-0.428571	4.69388	1.61224	-6.4898	0.122449	0343	frontal
25	017s5.jpg	headphones	sharp	No_Shaded	hand	10.2	1	0	0	1	sharp_curved	5.40816	0.571429	-3.36735	-0.428571	4.69388	1.61224	-6.4898	0.122449	0175	frontal
25	025s4.jpg	handle	sharp	No_Shaded	hand	33.2	1	0	0	1	sharp_curved	5.40816	0.571429	-3.36735	-0.428571	4.69388	1.61224	-6.4898	0.122449	0254	frontal
25	012s6.jpg	door	sharp	No_Shaded	hand	47	0	1	0	3	curved_sharp	5.40816	0.571429	-3.36735	-0.428571	4.69388	1.61224	-6.4898	0.122449	0126	frontal
25	049a1.jpg	backpack	curved	No_Shaded	hand	74.2	1	0	0	1	sharp_curved	5.40816	0.571429	-3.36735	-0.428571	4.69388	1.61224	-6.4898	0.122449	0491	three_four
25	034s3.jpg	handle	sharp	Shaded	hand	38.6	1	0	0	1	curved_sharp	5.40816	0.571429	-3.36735	-0.428571	4.69388	1.61224	-6.4898	0.122449	0343	frontal
25	025s6.jpg	comb	sharp	No_Shaded	hand	15	1	0	0	1	sharp_curved	5.40816	0.571429	-3.36735	-0.428571	4.69388	1.61224	-6.4898	0.122449	0256	frontal
25	040a5.jpg	watch	curved	Shaded	hand	79.8	1	0	0	1	sharp_curved	5.40816	0.571429	-3.36735	-0.428571	4.69388	1.61224	-6.4898	0.122449	0405	three_four
25	033a3.jpg	toaster	curved	No_Shaded	hand	29.4	0	1	0	3	sharp_curved	5.40816	0.571429	-3.36735	-0.428571	4.69388	1.61224	-6.4898	0.122449	0333	three_four
25	010s1.jpg	handbag	sharp	No_Shaded	computer	3.6	0	0	1	2	sharp_curved	5.40816	0.571429	-3.36735	-0.428571	4.69388	1.61224	-6.4898	0.122449	0101	frontal
25	002a3.jpg	lamp	curved	No_Shaded	hand	65.4	1	0	0	1	sharp_curved	5.40816	0.571429	-3.36735	-0.428571	4.69388	1.61224	-6.4898	0.122449	0023	three_four
25	034s1.jpg	jug	sharp	Shaded	hand	28.2	0	1	0	3	sharp_curved	5.40816	0.571429	-3.36735	-0.428571	4.69388	1.61224	-6.4898	0.122449	0341	frontal
25	014a5.jpg	cap	curved	No_Shaded	hand	88.2	1	0	0	1	sharp_curved	5.40816	0.571429	-3.36735	-0.428571	4.69388	1.61224	-6.4898	0.122449	0145	three_four
25	040a2.jpg	scissors	curved	Shaded	hand	100	1	0	0	1	sharp_curved	5.40816	0.571429	-3.36735	-0.428571	4.69388	1.61224	-6.4898	0.122449	0402	three_four
25	019a5.jpg	tap	curved	Shaded	computer	68.8	1	0	0	1	sharp_curved	5.40816	0.571429	-3.36735	-0.428571	4.69388	1.61224	-6.4898	0.122449	0195	three_four
25	017a1.jpg	lighter	curved	Shaded	hand	96.6	1	0	0	1	curved_sharp	5.40816	0.571429	-3.36735	-0.428571	4.69388	1.61224	-6.4898	0.122449	0171	three_four
25	052s2.jpg	photo frame	sharp	No_Shaded	computer	79.4	0	0	1	2	curved_sharp	5.40816	0.571429	-3.36735	-0.428571	4.69388	1.61224	-6.4898	0.122449	0522	three_four
25	002s3.jpg	lamp	sharp	No_Shaded	hand	26.4	1	0	0	1	sharp_curved	5.40816	0.571429	-3.36735	-0.428571	4.69388	1.61224	-6.4898	0.122449	0023	three_four
25	049s4.jpg	lamp	sharp	No_Shaded	hand	74.4	0	1	0	3	sharp_curved	5.40816	0.571429	-3.36735	-0.428571	4.69388	1.61224	-6.4898	0.122449	0494	frontal
25	017a5.jpg	headphones	curved	No_Shaded	hand	52.6	1	0	0	1	sharp_curved	5.40816	0.571429	-3.36735	-0.428571	4.69388	1.61224	-6.4898	0.122449	0175	frontal
25	040a7.jpg	pencil sharpener	curved	Shaded	hand	97.4	0	1	0	3	curved_sharp	5.40816	0.571429	-3.36735	-0.428571	4.69388	1.61224	-6.4898	0.122449	0407	three_four
25	050a7.jpg	mobile phone	curved	No_Shaded	computer	85.2	1	0	0	1	curved_sharp	5.40816	0.571429	-3.36735	-0.428571	4.69388	1.61224	-6.4898	0.122449	0507	frontal
25	025a6.jpg	comb	curved	No_Shaded	hand	66.2	1	0	0	1	sharp_curved	5.40816	0.571429	-3.36735	-0.428571	4.69388	1.61224	-6.4898	0.122449	0256	frontal
25	022s4.jpg	glass/cup	sharp	Shaded	hand	41.4	1	0	0	1	curved_sharp	5.40816	0.571429	-3.36735	-0.428571	4.69388	1.61224	-6.4898	0.122449	0224	frontal
25	010a4.jpg	clock	curved	No_Shaded	computer	69.4	1	0	0	1	sharp_curved	5.40816	0.571429	-3.36735	-0.428571	4.69388	1.61224	-6.4898	0.122449	0104	frontal
25	001a3.jpg	pen	curved	No_Shaded	computer	53.4	1	0	0	1	sharp_curved	5.40816	0.571429	-3.36735	-0.428571	4.69388	1.61224	-6.4898	0.122449	0013	three_four
25	002a5.jpg	umbrella	curved	No_Shaded	hand	46	1	0	0	1	sharp_curved	5.40816	0.571429	-3.36735	-0.428571	4.69388	1.61224	-6.4898	0.122449	0025	frontal
25	040s5.jpg	watch	sharp	Shaded	hand	69.8	1	0	0	1	sharp_curved	5.40816	0.571429	-3.36735	-0.428571	4.69388	1.61224	-6.4898	0.122449	0405	three_four
25	034s4.jpg	sponge	sharp	Shaded	hand	6.6	1	0	0	1	curved_sharp	5.40816	0.571429	-3.36735	-0.428571	4.69388	1.61224	-6.4898	0.122449	0344	three_four
25	050s4.jpg	coffee maker	sharp	No_Shaded	computer	52.4	0	0	1	2	sharp_curved	5.40816	0.571429	-3.36735	-0.428571	4.69388	1.61224	-6.4898	0.122449	0504	frontal
25	019a4.jpg	duct tape	curved	Shaded	computer	38	1	0	0	1	sharp_curved	5.40816	0.571429	-3.36735	-0.428571	4.69388	1.61224	-6.4898	0.122449	0194	three_four
25	010s3.jpg	glasses	sharp	No_Shaded	hand	27.6	0	0	1	2	curved_sharp	5.40816	0.571429	-3.36735	-0.428571	4.69388	1.61224	-6.4898	0.122449	0103	frontal
25	010a6.jpg	mirror	curved	No_Shaded	computer	50.4	0	0	1	2	curved_sharp	5.40816	0.571429	-3.36735	-0.428571	4.69388	1.61224	-6.4898	0.122449	0106	frontal
25	001a1.jpg	hat	curved	No_Shaded	computer	45.6	0	1	0	3	sharp_curved	5.40816	0.571429	-3.36735	-0.428571	4.69388	1.61224	-6.4898	0.122449	0011	three_four
25	027a2.jpg	electric guitar	curved	No_Shaded	computer	62.4	0	1	0	3	sharp_curved	5.40816	0.571429	-3.36735	-0.428571	4.69388	1.61224	-6.4898	0.122449	0272	frontal
25	016s4.jpg	lightbulb	sharp	No_Shaded	hand	60.8	1	0	0	1	curved_sharp	5.40816	0.571429	-3.36735	-0.428571	4.69388	1.61224	-6.4898	0.122449	0164	frontal
25	010s4.jpg	clock	sharp	No_Shaded	computer	38.6	1	0	0	1	sharp_curved	5.40816	0.571429	-3.36735	-0.428571	4.69388	1.61224	-6.4898	0.122449	0104	frontal
25	033a6.jpg	teapot	curved	No_Shaded	hand	17.8	0	0	1	2	curved_sharp	5.40816	0.571429	-3.36735	-0.428571	4.69388	1.61224	-6.4898	0.122449	0336	frontal
25	021a4.jpg	remote control	curved	No_Shaded	computer	54.2	1	0	0	1	curved_sharp	5.40816	0.571429	-3.36735	-0.428571	4.69388	1.61224	-6.4898	0.122449	0214	three_four
25	034a4.jpg	sponge	curved	Shaded	hand	16.6	1	0	0	1	curved_sharp	5.40816	0.571429	-3.36735	-0.428571	4.69388	1.61224	-6.4898	0.122449	0344	three_four
25	022a3.jpg	mobile phone	curved	Shaded	hand	87.2	1	0	0	1	curved_sharp	5.40816	0.571429	-3.36735	-0.428571	4.69388	1.61224	-6.4898	0.122449	0223	three_four
25	049s1.jpg	backpack	sharp	No_Shaded	hand	78.4	1	0	0	1	sharp_curved	5.40816	0.571429	-3.36735	-0.428571	4.69388	1.61224	-6.4898	0.122449	0491	three_four
25	002s5.jpg	umbrella	sharp	No_Shaded	hand	6	1	0	0	1	sharp_curved	5.40816	0.571429	-3.36735	-0.428571	4.69388	1.61224	-6.4898	0.122449	0025	frontal
25	033s6.jpg	teapot	sharp	No_Shaded	hand	1.4	0	0	1	2	curved_sharp	5.40816	0.571429	-3.36735	-0.428571	4.69388	1.61224	-6.4898	0.122449	0336	frontal
25	016a4.jpg	lightbulb	curved	No_Shaded	hand	64.8	1	0	0	1	curved_sharp	5.40816	0.571429	-3.36735	-0.428571	4.69388	1.61224	-6.4898	0.122449	0164	frontal
25	039s3.jpg	glass	sharp	Shaded	hand	18.4	1	0	0	1	sharp_curved	5.40816	0.571429	-3.36735	-0.428571	4.69388	1.61224	-6.4898	0.122449	0393	frontal
25	001s3.jpg	pen	sharp	No_Shaded	computer	51	1	0	0	1	sharp_curved	5.40816	0.571429	-3.36735	-0.428571	4.69388	1.61224	-6.4898	0.122449	0013	three_four
25	039s1.jpg	coffee maker	sharp	Shaded	hand	29.8	0	1	0	3	sharp_curved	5.40816	0.571429	-3.36735	-0.428571	4.69388	1.61224	-6.4898	0.122449	0391	frontal
25	016s6.jpg	watch	sharp	No_Shaded	hand	47.8	0	0	1	2	curved_sharp	5.40816	0.571429	-3.36735	-0.428571	4.69388	1.61224	-6.4898	0.122449	0166	frontal
25	034a1.jpg	jug	curved	Shaded	hand	71.4	0	1	0	3	sharp_curved	5.40816	0.571429	-3.36735	-0.428571	4.69388	1.61224	-6.4898	0.122449	0341	frontal
25	040a6.jpg	chair	curved	Shaded	hand	88.2	1	0	0	1	curved_sharp	5.40816	0.571429	-3.36735	-0.428571	4.69388	1.61224	-6.4898	0.122449	0406	three_four
25	050s5.jpg	tvmonitor	sharp	No_Shaded	computer	49	1	0	0	1	sharp_curved	5.40816	0.571429	-3.36735	-0.428571	4.69388	1.61224	-6.4898	0.122449	0505	frontal
25	039a1.jpg	coffee maker	curved	Shaded	hand	24.6	0	1	0	3	sharp_curved	5.40816	0.571429	-3.36735	-0.428571	4.69388	1.61224	-6.4898	0.122449	0391	frontal
25	010a7.jpg	remote control	curved	No_Shaded	hand	36.2	1	0	0	1	curved_sharp	5.40816	0.571429	-3.36735	-0.428571	4.69388	1.61224	-6.4898	0.122449	0107	three_four
25	017s1.jpg	lighter	sharp	Shaded	hand	36	1	0	0	1	curved_sharp	5.40816	0.571429	-3.36735	-0.428571	4.69388	1.61224	-6.4898	0.122449	0171	three_four
25	040s6.jpg	chair	sharp	Shaded	hand	71.8	1	0	0	1	curved_sharp	5.40816	0.571429	-3.36735	-0.428571	4.69388	1.61224	-6.4898	0.122449	0406	three_four
25	025a4.jpg	handle	curved	No_Shaded	hand	72	1	0	0	1	sharp_curved	5.40816	0.571429	-3.36735	-0.428571	4.69388	1.61224	-6.4898	0.122449	0254	frontal
25	025s5.jpg	glasses	sharp	No_Shaded	hand	36.4	1	0	0	1	curved_sharp	5.40816	0.571429	-3.36735	-0.428571	4.69388	1.61224	-6.4898	0.122449	0255	three_four
25	034s6.jpg	radio	sharp	Shaded	hand	52.2	0	0	1	2	sharp_curved	5.40816	0.571429	-3.36735	-0.428571	4.69388	1.61224	-6.4898	0.122449	0346	frontal
25	001s1.jpg	hat	sharp	No_Shaded	computer	66.8	0	1	0	3	sharp_curved	5.40816	0.571429	-3.36735	-0.428571	4.69388	1.61224	-6.4898	0.122449	0011	three_four
25	050s7.jpg	mobile phone	sharp	No_Shaded	computer	54.6	1	0	0	1	curved_sharp	5.40816	0.571429	-3.36735	-0.428571	4.69388	1.61224	-6.4898	0.122449	0507	frontal
25	050a4.jpg	coffee maker	curved	No_Shaded	computer	63.6	0	0	1	2	sharp_curved	5.40816	0.571429	-3.36735	-0.428571	4.69388	1.61224	-6.4898	0.122449	0504	frontal
25	049s2.jpg	tv	sharp	No_Shaded	hand	67	1	0	0	1	sharp_curved	5.40816	0.571429	-3.36735	-0.428571	4.69388	1.61224	-6.4898	0.122449	0492	frontal
25	021a3.jpg	toaster	curved	No_Shaded	computer	33	0	1	0	3	sharp_curved	5.40816	0.571429	-3.36735	-0.428571	4.69388	1.61224	-6.4898	0.122449	0213	three_four
25	040s7.jpg	pencil sharpener	sharp	Shaded	hand	82.6	0	1	0	3	curved_sharp	5.40816	0.571429	-3.36735	-0.428571	4.69388	1.61224	-6.4898	0.122449	0407	three_four
25	008a1.jpg	mirror	curved	No_Shaded	computer	95	0	0	1	2	sharp_curved	5.40816	0.571429	-3.36735	-0.428571	4.69388	1.61224	-6.4898	0.122449	0081	three_four
25	010s6.jpg	mirror	sharp	No_Shaded	computer	50	0	0	1	2	curved_sharp	5.40816	0.571429	-3.36735	-0.428571	4.69388	1.61224	-6.4898	0.122449	0106	frontal
25	016a6.jpg	watch	curved	No_Shaded	hand	55.6	0	0	1	2	curved_sharp	5.40816	0.571429	-3.36735	-0.428571	4.69388	1.61224	-6.4898	0.122449	0166	frontal
25	049a2.jpg	tv	curved	No_Shaded	hand	68.8	1	0	0	1	sharp_curved	5.40816	0.571429	-3.36735	-0.428571	4.69388	1.61224	-6.4898	0.122449	0492	frontal
25	019s5.jpg	tap	sharp	Shaded	computer	57.4	1	0	0	1	sharp_curved	5.40816	0.571429	-3.36735	-0.428571	4.69388	1.61224	-6.4898	0.122449	0195	three_four
25	025a5.jpg	glasses	curved	No_Shaded	hand	79.8	1	0	0	1	curved_sharp	5.40816	0.571429	-3.36735	-0.428571	4.69388	1.61224	-6.4898	0.122449	0255	three_four
25	027s2.jpg	electric guitar	sharp	No_Shaded	computer	79.8	0	1	0	3	sharp_curved	5.40816	0.571429	-3.36735	-0.428571	4.69388	1.61224	-6.4898	0.122449	0272	frontal
25	039a3.jpg	glass	curved	Shaded	hand	80.8	1	0	0	1	sharp_curved	5.40816	0.571429	-3.36735	-0.428571	4.69388	1.61224	-6.4898	0.122449	0393	frontal
25	034a6.jpg	radio	curved	Shaded	hand	34	0	0	1	2	sharp_curved	5.40816	0.571429	-3.36735	-0.428571	4.69388	1.61224	-6.4898	0.122449	0346	frontal
25	019s4.jpg	duct tape	sharp	Shaded	computer	17.2	1	0	0	1	sharp_curved	5.40816	0.571429	-3.36735	-0.428571	4.69388	1.61224	-6.4898	0.122449	0194	three_four
25	033s3.jpg	toaster	sharp	No_Shaded	hand	12.6	0	1	0	3	sharp_curved	5.40816	0.571429	-3.36735	-0.428571	4.69388	1.61224	-6.4898	0.122449	0333	three_four
25	040s2.jpg	scissors	sharp	Shaded	hand	52.4	1	0	0	1	sharp_curved	5.40816	0.571429	-3.36735	-0.428571	4.69388	1.61224	-6.4898	0.122449	0402	three_four
25	010a1.jpg	handbag	curved	No_Shaded	computer	0.8	0	0	1	2	sharp_curved	5.40816	0.571429	-3.36735	-0.428571	4.69388	1.61224	-6.4898	0.122449	0101	frontal
25	010a3.jpg	glasses	curved	No_Shaded	hand	28.8	0	0	1	2	curved_sharp	5.40816	0.571429	-3.36735	-0.428571	4.69388	1.61224	-6.4898	0.122449	0103	frontal
25	010s7.jpg	remote control	sharp	No_Shaded	hand	31.2	1	0	0	1	curved_sharp	5.40816	0.571429	-3.36735	-0.428571	4.69388	1.61224	-6.4898	0.122449	0107	three_four
25	014s5.jpg	cap	sharp	No_Shaded	hand	71.4	1	0	0	1	sharp_curved	5.40816	0.571429	-3.36735	-0.428571	4.69388	1.61224	-6.4898	0.122449	0145	three_four
26	050a7.jpg	mobile phone	curved	No_Shaded	computer	71.2	1	0	0	1	sharp_curved	-9.59184	-1.42857	-11.3673	-4.42857	0.693878	0.612245	-7.4898	-8.87755	0507	frontal
26	012a6.jpg	door	curved	No_Shaded	hand	22.6	0	0	1	2	curved_sharp	-9.59184	-1.42857	-11.3673	-4.42857	0.693878	0.612245	-7.4898	-8.87755	0126	frontal
26	002a3.jpg	lamp	curved	No_Shaded	hand	50.8	1	0	0	1	sharp_curved	-9.59184	-1.42857	-11.3673	-4.42857	0.693878	0.612245	-7.4898	-8.87755	0023	three_four
26	034a3.jpg	handle	curved	Shaded	hand	39.8	1	0	0	1	sharp_curved	-9.59184	-1.42857	-11.3673	-4.42857	0.693878	0.612245	-7.4898	-8.87755	0343	frontal
26	017s5.jpg	headphones	sharp	No_Shaded	hand	61.4	1	0	0	1	curved_sharp	-9.59184	-1.42857	-11.3673	-4.42857	0.693878	0.612245	-7.4898	-8.87755	0175	frontal
26	010a1.jpg	handbag	curved	No_Shaded	computer	87.6	1	0	0	1	sharp_curved	-9.59184	-1.42857	-11.3673	-4.42857	0.693878	0.612245	-7.4898	-8.87755	0101	frontal
26	019s5.jpg	tap	sharp	Shaded	computer	91.4	0	0	1	2	sharp_curved	-9.59184	-1.42857	-11.3673	-4.42857	0.693878	0.612245	-7.4898	-8.87755	0195	three_four
26	025a5.jpg	glasses	curved	No_Shaded	hand	57	1	0	0	1	curved_sharp	-9.59184	-1.42857	-11.3673	-4.42857	0.693878	0.612245	-7.4898	-8.87755	0255	three_four
26	010a3.jpg	glasses	curved	No_Shaded	hand	20.8	1	0	0	1	sharp_curved	-9.59184	-1.42857	-11.3673	-4.42857	0.693878	0.612245	-7.4898	-8.87755	0103	frontal
26	034s4.jpg	sponge	sharp	Shaded	hand	2.4	1	0	0	1	curved_sharp	-9.59184	-1.42857	-11.3673	-4.42857	0.693878	0.612245	-7.4898	-8.87755	0344	three_four
26	040s2.jpg	scissors	sharp	Shaded	hand	60.8	1	0	0	1	sharp_curved	-9.59184	-1.42857	-11.3673	-4.42857	0.693878	0.612245	-7.4898	-8.87755	0402	three_four
26	040a5.jpg	watch	curved	Shaded	hand	69.6	1	0	0	1	sharp_curved	-9.59184	-1.42857	-11.3673	-4.42857	0.693878	0.612245	-7.4898	-8.87755	0405	three_four
26	049s1.jpg	backpack	sharp	No_Shaded	hand	85.2	0	0	1	2	curved_sharp	-9.59184	-1.42857	-11.3673	-4.42857	0.693878	0.612245	-7.4898	-8.87755	0491	three_four
26	010s3.jpg	glasses	sharp	No_Shaded	hand	23.4	1	0	0	1	sharp_curved	-9.59184	-1.42857	-11.3673	-4.42857	0.693878	0.612245	-7.4898	-8.87755	0103	frontal
26	019a4.jpg	duct tape	curved	Shaded	computer	52.4	0	1	0	3	sharp_curved	-9.59184	-1.42857	-11.3673	-4.42857	0.693878	0.612245	-7.4898	-8.87755	0194	three_four
26	039s3.jpg	glass	sharp	Shaded	hand	62.2	1	0	0	1	sharp_curved	-9.59184	-1.42857	-11.3673	-4.42857	0.693878	0.612245	-7.4898	-8.87755	0393	frontal
26	034s3.jpg	handle	sharp	Shaded	hand	31.6	1	0	0	1	sharp_curved	-9.59184	-1.42857	-11.3673	-4.42857	0.693878	0.612245	-7.4898	-8.87755	0343	frontal
26	040s7.jpg	pencil sharpener	sharp	Shaded	hand	72.6	0	1	0	3	curved_sharp	-9.59184	-1.42857	-11.3673	-4.42857	0.693878	0.612245	-7.4898	-8.87755	0407	three_four
26	017a5.jpg	headphones	curved	No_Shaded	hand	20.4	1	0	0	1	curved_sharp	-9.59184	-1.42857	-11.3673	-4.42857	0.693878	0.612245	-7.4898	-8.87755	0175	frontal
26	039a1.jpg	coffee maker	curved	Shaded	hand	52.4	0	1	0	3	curved_sharp	-9.59184	-1.42857	-11.3673	-4.42857	0.693878	0.612245	-7.4898	-8.87755	0391	frontal
26	049a4.jpg	lamp	curved	No_Shaded	hand	69.4	0	0	1	2	curved_sharp	-9.59184	-1.42857	-11.3673	-4.42857	0.693878	0.612245	-7.4898	-8.87755	0494	frontal
26	034s6.jpg	radio	sharp	Shaded	hand	83	0	0	1	2	curved_sharp	-9.59184	-1.42857	-11.3673	-4.42857	0.693878	0.612245	-7.4898	-8.87755	0346	frontal
26	016s4.jpg	lightbulb	sharp	No_Shaded	hand	35.6	1	0	0	1	sharp_curved	-9.59184	-1.42857	-11.3673	-4.42857	0.693878	0.612245	-7.4898	-8.87755	0164	frontal
26	014a5.jpg	cap	curved	No_Shaded	hand	68.2	1	0	0	1	curved_sharp	-9.59184	-1.42857	-11.3673	-4.42857	0.693878	0.612245	-7.4898	-8.87755	0145	three_four
26	039s1.jpg	coffee maker	sharp	Shaded	hand	76.2	0	1	0	3	curved_sharp	-9.59184	-1.42857	-11.3673	-4.42857	0.693878	0.612245	-7.4898	-8.87755	0391	frontal
26	010s6.jpg	mirror	sharp	No_Shaded	computer	24.4	0	0	1	2	curved_sharp	-9.59184	-1.42857	-11.3673	-4.42857	0.693878	0.612245	-7.4898	-8.87755	0106	frontal
26	022a3.jpg	mobile phone	curved	Shaded	hand	81.8	1	0	0	1	sharp_curved	-9.59184	-1.42857	-11.3673	-4.42857	0.693878	0.612245	-7.4898	-8.87755	0223	three_four
26	050a5.jpg	tvmonitor	curved	No_Shaded	computer	34	0	1	0	3	curved_sharp	-9.59184	-1.42857	-11.3673	-4.42857	0.693878	0.612245	-7.4898	-8.87755	0505	frontal
26	040a2.jpg	scissors	curved	Shaded	hand	64	1	0	0	1	sharp_curved	-9.59184	-1.42857	-11.3673	-4.42857	0.693878	0.612245	-7.4898	-8.87755	0402	three_four
26	002a5.jpg	umbrella	curved	No_Shaded	hand	9.6	0	0	1	2	curved_sharp	-9.59184	-1.42857	-11.3673	-4.42857	0.693878	0.612245	-7.4898	-8.87755	0025	frontal
26	021s4.jpg	remote control	sharp	No_Shaded	computer	30.2	0	0	1	2	curved_sharp	-9.59184	-1.42857	-11.3673	-4.42857	0.693878	0.612245	-7.4898	-8.87755	0214	three_four
26	010s4.jpg	clock	sharp	No_Shaded	computer	13	1	0	0	1	sharp_curved	-9.59184	-1.42857	-11.3673	-4.42857	0.693878	0.612245	-7.4898	-8.87755	0104	frontal
26	021s3.jpg	toaster	sharp	No_Shaded	computer	14.4	0	1	0	3	sharp_curved	-9.59184	-1.42857	-11.3673	-4.42857	0.693878	0.612245	-7.4898	-8.87755	0213	three_four
26	033a6.jpg	teapot	curved	No_Shaded	hand	16.6	1	0	0	1	curved_sharp	-9.59184	-1.42857	-11.3673	-4.42857	0.693878	0.612245	-7.4898	-8.87755	0336	frontal
26	040s6.jpg	chair	sharp	Shaded	hand	32	1	0	0	1	sharp_curved	-9.59184	-1.42857	-11.3673	-4.42857	0.693878	0.612245	-7.4898	-8.87755	0406	three_four
26	008s1.jpg	mirror	sharp	No_Shaded	computer	31	0	1	0	3	sharp_curved	-9.59184	-1.42857	-11.3673	-4.42857	0.693878	0.612245	-7.4898	-8.87755	0081	three_four
26	001s1.jpg	hat	sharp	No_Shaded	computer	16.6	0	1	0	3	sharp_curved	-9.59184	-1.42857	-11.3673	-4.42857	0.693878	0.612245	-7.4898	-8.87755	0011	three_four
26	025a6.jpg	comb	curved	No_Shaded	hand	8.8	1	0	0	1	curved_sharp	-9.59184	-1.42857	-11.3673	-4.42857	0.693878	0.612245	-7.4898	-8.87755	0256	frontal
26	025s5.jpg	glasses	sharp	No_Shaded	hand	19.8	1	0	0	1	curved_sharp	-9.59184	-1.42857	-11.3673	-4.42857	0.693878	0.612245	-7.4898	-8.87755	0255	three_four
26	022s4.jpg	glass/cup	sharp	Shaded	hand	49.4	0	0	1	2	curved_sharp	-9.59184	-1.42857	-11.3673	-4.42857	0.693878	0.612245	-7.4898	-8.87755	0224	frontal
26	001s3.jpg	pen	sharp	No_Shaded	computer	5.6	0	0	1	2	curved_sharp	-9.59184	-1.42857	-11.3673	-4.42857	0.693878	0.612245	-7.4898	-8.87755	0013	three_four
26	008a1.jpg	mirror	curved	No_Shaded	computer	10.2	0	1	0	3	sharp_curved	-9.59184	-1.42857	-11.3673	-4.42857	0.693878	0.612245	-7.4898	-8.87755	0081	three_four
26	040a7.jpg	pencil sharpener	curved	Shaded	hand	61.4	0	1	0	3	curved_sharp	-9.59184	-1.42857	-11.3673	-4.42857	0.693878	0.612245	-7.4898	-8.87755	0407	three_four
26	040s5.jpg	watch	sharp	Shaded	hand	69.6	1	0	0	1	sharp_curved	-9.59184	-1.42857	-11.3673	-4.42857	0.693878	0.612245	-7.4898	-8.87755	0405	three_four
26	052s2.jpg	photo frame	sharp	No_Shaded	computer	26.4	0	0	1	2	curved_sharp	-9.59184	-1.42857	-11.3673	-4.42857	0.693878	0.612245	-7.4898	-8.87755	0522	three_four
26	010s1.jpg	handbag	sharp	No_Shaded	computer	19.6	1	0	0	1	sharp_curved	-9.59184	-1.42857	-11.3673	-4.42857	0.693878	0.612245	-7.4898	-8.87755	0101	frontal
26	016a4.jpg	lightbulb	curved	No_Shaded	hand	24.2	1	0	0	1	sharp_curved	-9.59184	-1.42857	-11.3673	-4.42857	0.693878	0.612245	-7.4898	-8.87755	0164	frontal
26	025s6.jpg	comb	sharp	No_Shaded	hand	19.8	1	0	0	1	curved_sharp	-9.59184	-1.42857	-11.3673	-4.42857	0.693878	0.612245	-7.4898	-8.87755	0256	frontal
26	049a1.jpg	backpack	curved	No_Shaded	hand	52.2	0	0	1	2	curved_sharp	-9.59184	-1.42857	-11.3673	-4.42857	0.693878	0.612245	-7.4898	-8.87755	0491	three_four
26	052a2.jpg	photo frame	curved	No_Shaded	computer	30.4	0	0	1	2	curved_sharp	-9.59184	-1.42857	-11.3673	-4.42857	0.693878	0.612245	-7.4898	-8.87755	0522	three_four
26	025s4.jpg	handle	sharp	No_Shaded	hand	23.6	0	0	1	2	sharp_curved	-9.59184	-1.42857	-11.3673	-4.42857	0.693878	0.612245	-7.4898	-8.87755	0254	frontal
26	033s6.jpg	teapot	sharp	No_Shaded	hand	0	1	0	0	1	curved_sharp	-9.59184	-1.42857	-11.3673	-4.42857	0.693878	0.612245	-7.4898	-8.87755	0336	frontal
26	033a3.jpg	toaster	curved	No_Shaded	hand	0	0	1	0	3	curved_sharp	-9.59184	-1.42857	-11.3673	-4.42857	0.693878	0.612245	-7.4898	-8.87755	0333	three_four
26	050s4.jpg	coffee maker	sharp	No_Shaded	computer	35.4	0	0	1	2	sharp_curved	-9.59184	-1.42857	-11.3673	-4.42857	0.693878	0.612245	-7.4898	-8.87755	0504	frontal
26	021a4.jpg	remote control	curved	No_Shaded	computer	26.8	0	0	1	2	curved_sharp	-9.59184	-1.42857	-11.3673	-4.42857	0.693878	0.612245	-7.4898	-8.87755	0214	three_four
26	021a3.jpg	toaster	curved	No_Shaded	computer	10.4	0	1	0	3	sharp_curved	-9.59184	-1.42857	-11.3673	-4.42857	0.693878	0.612245	-7.4898	-8.87755	0213	three_four
26	016a6.jpg	watch	curved	No_Shaded	hand	0	1	0	0	1	curved_sharp	-9.59184	-1.42857	-11.3673	-4.42857	0.693878	0.612245	-7.4898	-8.87755	0166	frontal
26	049a2.jpg	tv	curved	No_Shaded	hand	16.8	0	1	0	3	curved_sharp	-9.59184	-1.42857	-11.3673	-4.42857	0.693878	0.612245	-7.4898	-8.87755	0492	frontal
26	034s1.jpg	jug	sharp	Shaded	hand	0	1	0	0	1	sharp_curved	-9.59184	-1.42857	-11.3673	-4.42857	0.693878	0.612245	-7.4898	-8.87755	0341	frontal
26	033s3.jpg	toaster	sharp	No_Shaded	hand	0	0	1	0	3	curved_sharp	-9.59184	-1.42857	-11.3673	-4.42857	0.693878	0.612245	-7.4898	-8.87755	0333	three_four
26	050s7.jpg	mobile phone	sharp	No_Shaded	computer	27.2	1	0	0	1	sharp_curved	-9.59184	-1.42857	-11.3673	-4.42857	0.693878	0.612245	-7.4898	-8.87755	0507	frontal
26	039a3.jpg	glass	curved	Shaded	hand	23.6	1	0	0	1	sharp_curved	-9.59184	-1.42857	-11.3673	-4.42857	0.693878	0.612245	-7.4898	-8.87755	0393	frontal
26	002s5.jpg	umbrella	sharp	No_Shaded	hand	15.6	0	0	1	2	curved_sharp	-9.59184	-1.42857	-11.3673	-4.42857	0.693878	0.612245	-7.4898	-8.87755	0025	frontal
26	050a4.jpg	coffee maker	curved	No_Shaded	computer	33.4	0	0	1	2	sharp_curved	-9.59184	-1.42857	-11.3673	-4.42857	0.693878	0.612245	-7.4898	-8.87755	0504	frontal
26	027s2.jpg	electric guitar	sharp	No_Shaded	computer	56.4	0	0	1	2	curved_sharp	-9.59184	-1.42857	-11.3673	-4.42857	0.693878	0.612245	-7.4898	-8.87755	0272	frontal
26	022s3.jpg	mobile phone	sharp	Shaded	hand	85	1	0	0	1	sharp_curved	-9.59184	-1.42857	-11.3673	-4.42857	0.693878	0.612245	-7.4898	-8.87755	0223	three_four
26	016s6.jpg	watch	sharp	No_Shaded	hand	0.8	1	0	0	1	curved_sharp	-9.59184	-1.42857	-11.3673	-4.42857	0.693878	0.612245	-7.4898	-8.87755	0166	frontal
26	001a3.jpg	pen	curved	No_Shaded	computer	4.4	0	0	1	2	curved_sharp	-9.59184	-1.42857	-11.3673	-4.42857	0.693878	0.612245	-7.4898	-8.87755	0013	three_four
26	022a4.jpg	glass/cup	curved	Shaded	hand	76.8	0	0	1	2	curved_sharp	-9.59184	-1.42857	-11.3673	-4.42857	0.693878	0.612245	-7.4898	-8.87755	0224	frontal
26	014s5.jpg	cap	sharp	No_Shaded	hand	56	1	0	0	1	curved_sharp	-9.59184	-1.42857	-11.3673	-4.42857	0.693878	0.612245	-7.4898	-8.87755	0145	three_four
26	017a1.jpg	lighter	curved	Shaded	hand	13.8	1	0	0	1	curved_sharp	-9.59184	-1.42857	-11.3673	-4.42857	0.693878	0.612245	-7.4898	-8.87755	0171	three_four
26	049s2.jpg	tv	sharp	No_Shaded	hand	52.4	0	1	0	3	curved_sharp	-9.59184	-1.42857	-11.3673	-4.42857	0.693878	0.612245	-7.4898	-8.87755	0492	frontal
26	010a4.jpg	clock	curved	No_Shaded	computer	10.4	1	0	0	1	sharp_curved	-9.59184	-1.42857	-11.3673	-4.42857	0.693878	0.612245	-7.4898	-8.87755	0104	frontal
26	025a4.jpg	handle	curved	No_Shaded	hand	7.8	0	0	1	2	sharp_curved	-9.59184	-1.42857	-11.3673	-4.42857	0.693878	0.612245	-7.4898	-8.87755	0254	frontal
26	010a7.jpg	remote control	curved	No_Shaded	hand	7.8	1	0	0	1	curved_sharp	-9.59184	-1.42857	-11.3673	-4.42857	0.693878	0.612245	-7.4898	-8.87755	0107	three_four
26	034a6.jpg	radio	curved	Shaded	hand	58	0	0	1	2	curved_sharp	-9.59184	-1.42857	-11.3673	-4.42857	0.693878	0.612245	-7.4898	-8.87755	0346	frontal
26	049s4.jpg	lamp	sharp	No_Shaded	hand	50.2	0	0	1	2	curved_sharp	-9.59184	-1.42857	-11.3673	-4.42857	0.693878	0.612245	-7.4898	-8.87755	0494	frontal
26	034a1.jpg	jug	curved	Shaded	hand	13.6	1	0	0	1	sharp_curved	-9.59184	-1.42857	-11.3673	-4.42857	0.693878	0.612245	-7.4898	-8.87755	0341	frontal
26	027a2.jpg	electric guitar	curved	No_Shaded	computer	60.6	0	0	1	2	curved_sharp	-9.59184	-1.42857	-11.3673	-4.42857	0.693878	0.612245	-7.4898	-8.87755	0272	frontal
26	010s7.jpg	remote control	sharp	No_Shaded	hand	18.6	1	0	0	1	curved_sharp	-9.59184	-1.42857	-11.3673	-4.42857	0.693878	0.612245	-7.4898	-8.87755	0107	three_four
26	017s1.jpg	lighter	sharp	Shaded	hand	53	1	0	0	1	curved_sharp	-9.59184	-1.42857	-11.3673	-4.42857	0.693878	0.612245	-7.4898	-8.87755	0171	three_four
26	001a1.jpg	hat	curved	No_Shaded	computer	13	0	1	0	3	sharp_curved	-9.59184	-1.42857	-11.3673	-4.42857	0.693878	0.612245	-7.4898	-8.87755	0011	three_four
26	040a6.jpg	chair	curved	Shaded	hand	27.2	1	0	0	1	sharp_curved	-9.59184	-1.42857	-11.3673	-4.42857	0.693878	0.612245	-7.4898	-8.87755	0406	three_four
26	012s6.jpg	door	sharp	No_Shaded	hand	3.2	0	0	1	2	curved_sharp	-9.59184	-1.42857	-11.3673	-4.42857	0.693878	0.612245	-7.4898	-8.87755	0126	frontal
26	002s3.jpg	lamp	sharp	No_Shaded	hand	7	1	0	0	1	sharp_curved	-9.59184	-1.42857	-11.3673	-4.42857	0.693878	0.612245	-7.4898	-8.87755	0023	three_four
26	019s4.jpg	duct tape	sharp	Shaded	computer	17	0	1	0	3	sharp_curved	-9.59184	-1.42857	-11.3673	-4.42857	0.693878	0.612245	-7.4898	-8.87755	0194	three_four
26	050s5.jpg	tvmonitor	sharp	No_Shaded	computer	10	0	1	0	3	curved_sharp	-9.59184	-1.42857	-11.3673	-4.42857	0.693878	0.612245	-7.4898	-8.87755	0505	frontal
26	019a5.jpg	tap	curved	Shaded	computer	27.8	0	0	1	2	sharp_curved	-9.59184	-1.42857	-11.3673	-4.42857	0.693878	0.612245	-7.4898	-8.87755	0195	three_four
26	034a4.jpg	sponge	curved	Shaded	hand	5.6	1	0	0	1	curved_sharp	-9.59184	-1.42857	-11.3673	-4.42857	0.693878	0.612245	-7.4898	-8.87755	0344	three_four
26	010a6.jpg	mirror	curved	No_Shaded	computer	18.8	0	0	1	2	curved_sharp	-9.59184	-1.42857	-11.3673	-4.42857	0.693878	0.612245	-7.4898	-8.87755	0106	frontal
27	033s3.jpg	toaster	sharp	No_Shaded	hand	41.8	1	0	0	1	sharp_curved	-3.59184	-1.42857	0.632653	2.57143	-0.306122	-1.38776	3.5102	-0.877551	0333	three_four
27	039a1.jpg	coffee maker	curved	Shaded	hand	59.6	0	1	0	3	sharp_curved	-3.59184	-1.42857	0.632653	2.57143	-0.306122	-1.38776	3.5102	-0.877551	0391	frontal
27	002a5.jpg	umbrella	curved	No_Shaded	hand	61.6	1	0	0	1	sharp_curved	-3.59184	-1.42857	0.632653	2.57143	-0.306122	-1.38776	3.5102	-0.877551	0025	frontal
27	034a6.jpg	radio	curved	Shaded	hand	58.4	0	1	0	3	curved_sharp	-3.59184	-1.42857	0.632653	2.57143	-0.306122	-1.38776	3.5102	-0.877551	0346	frontal
27	050s5.jpg	tvmonitor	sharp	No_Shaded	computer	15.6	0	1	0	3	sharp_curved	-3.59184	-1.42857	0.632653	2.57143	-0.306122	-1.38776	3.5102	-0.877551	0505	frontal
27	021a4.jpg	remote control	curved	No_Shaded	computer	86.2	1	0	0	1	sharp_curved	-3.59184	-1.42857	0.632653	2.57143	-0.306122	-1.38776	3.5102	-0.877551	0214	three_four
27	040s2.jpg	scissors	sharp	Shaded	hand	20.2	1	0	0	1	curved_sharp	-3.59184	-1.42857	0.632653	2.57143	-0.306122	-1.38776	3.5102	-0.877551	0402	three_four
27	010a3.jpg	glasses	curved	No_Shaded	hand	50.4	0	0	1	2	curved_sharp	-3.59184	-1.42857	0.632653	2.57143	-0.306122	-1.38776	3.5102	-0.877551	0103	frontal
27	039s1.jpg	coffee maker	sharp	Shaded	hand	75.6	0	1	0	3	sharp_curved	-3.59184	-1.42857	0.632653	2.57143	-0.306122	-1.38776	3.5102	-0.877551	0391	frontal
27	040a6.jpg	chair	curved	Shaded	hand	50	1	0	0	1	curved_sharp	-3.59184	-1.42857	0.632653	2.57143	-0.306122	-1.38776	3.5102	-0.877551	0406	three_four
27	049a1.jpg	backpack	curved	No_Shaded	hand	56.8	0	0	1	2	sharp_curved	-3.59184	-1.42857	0.632653	2.57143	-0.306122	-1.38776	3.5102	-0.877551	0491	three_four
27	034s3.jpg	handle	sharp	Shaded	hand	70.2	0	1	0	3	curved_sharp	-3.59184	-1.42857	0.632653	2.57143	-0.306122	-1.38776	3.5102	-0.877551	0343	frontal
27	008a1.jpg	mirror	curved	No_Shaded	computer	22.8	1	0	0	1	sharp_curved	-3.59184	-1.42857	0.632653	2.57143	-0.306122	-1.38776	3.5102	-0.877551	0081	three_four
27	025s6.jpg	comb	sharp	No_Shaded	hand	41.2	1	0	0	1	curved_sharp	-3.59184	-1.42857	0.632653	2.57143	-0.306122	-1.38776	3.5102	-0.877551	0256	frontal
27	017a5.jpg	headphones	curved	No_Shaded	hand	78.6	1	0	0	1	curved_sharp	-3.59184	-1.42857	0.632653	2.57143	-0.306122	-1.38776	3.5102	-0.877551	0175	frontal
27	040a5.jpg	watch	curved	Shaded	hand	60.6	1	0	0	1	sharp_curved	-3.59184	-1.42857	0.632653	2.57143	-0.306122	-1.38776	3.5102	-0.877551	0405	three_four
27	040s7.jpg	pencil sharpener	sharp	Shaded	hand	55.4	1	0	0	1	sharp_curved	-3.59184	-1.42857	0.632653	2.57143	-0.306122	-1.38776	3.5102	-0.877551	0407	three_four
27	034s1.jpg	jug	sharp	Shaded	hand	30.8	1	0	0	1	curved_sharp	-3.59184	-1.42857	0.632653	2.57143	-0.306122	-1.38776	3.5102	-0.877551	0341	frontal
27	010a6.jpg	mirror	curved	No_Shaded	computer	58.2	1	0	0	1	sharp_curved	-3.59184	-1.42857	0.632653	2.57143	-0.306122	-1.38776	3.5102	-0.877551	0106	frontal
27	039a3.jpg	glass	curved	Shaded	hand	74.2	1	0	0	1	sharp_curved	-3.59184	-1.42857	0.632653	2.57143	-0.306122	-1.38776	3.5102	-0.877551	0393	frontal
27	017a1.jpg	lighter	curved	Shaded	hand	69.2	1	0	0	1	curved_sharp	-3.59184	-1.42857	0.632653	2.57143	-0.306122	-1.38776	3.5102	-0.877551	0171	three_four
27	017s5.jpg	headphones	sharp	No_Shaded	hand	10	1	0	0	1	curved_sharp	-3.59184	-1.42857	0.632653	2.57143	-0.306122	-1.38776	3.5102	-0.877551	0175	frontal
27	016a4.jpg	lightbulb	curved	No_Shaded	hand	70.8	1	0	0	1	curved_sharp	-3.59184	-1.42857	0.632653	2.57143	-0.306122	-1.38776	3.5102	-0.877551	0164	frontal
27	010s3.jpg	glasses	sharp	No_Shaded	hand	33	0	0	1	2	curved_sharp	-3.59184	-1.42857	0.632653	2.57143	-0.306122	-1.38776	3.5102	-0.877551	0103	frontal
27	033a3.jpg	toaster	curved	No_Shaded	hand	81	1	0	0	1	sharp_curved	-3.59184	-1.42857	0.632653	2.57143	-0.306122	-1.38776	3.5102	-0.877551	0333	three_four
27	002s3.jpg	lamp	sharp	No_Shaded	hand	14	1	0	0	1	curved_sharp	-3.59184	-1.42857	0.632653	2.57143	-0.306122	-1.38776	3.5102	-0.877551	0023	three_four
27	012s6.jpg	door	sharp	No_Shaded	hand	20.8	0	1	0	3	sharp_curved	-3.59184	-1.42857	0.632653	2.57143	-0.306122	-1.38776	3.5102	-0.877551	0126	frontal
27	022a4.jpg	glass/cup	curved	Shaded	hand	91.4	1	0	0	1	sharp_curved	-3.59184	-1.42857	0.632653	2.57143	-0.306122	-1.38776	3.5102	-0.877551	0224	frontal
27	034s4.jpg	sponge	sharp	Shaded	hand	11.8	1	0	0	1	sharp_curved	-3.59184	-1.42857	0.632653	2.57143	-0.306122	-1.38776	3.5102	-0.877551	0344	three_four
27	010s7.jpg	remote control	sharp	No_Shaded	hand	23.2	0	0	1	2	sharp_curved	-3.59184	-1.42857	0.632653	2.57143	-0.306122	-1.38776	3.5102	-0.877551	0107	three_four
27	025a4.jpg	handle	curved	No_Shaded	hand	82.8	0	0	1	2	sharp_curved	-3.59184	-1.42857	0.632653	2.57143	-0.306122	-1.38776	3.5102	-0.877551	0254	frontal
27	040s6.jpg	chair	sharp	Shaded	hand	54.6	1	0	0	1	curved_sharp	-3.59184	-1.42857	0.632653	2.57143	-0.306122	-1.38776	3.5102	-0.877551	0406	three_four
27	001s3.jpg	pen	sharp	No_Shaded	computer	53.4	1	0	0	1	curved_sharp	-3.59184	-1.42857	0.632653	2.57143	-0.306122	-1.38776	3.5102	-0.877551	0013	three_four
27	002a3.jpg	lamp	curved	No_Shaded	hand	71.8	1	0	0	1	curved_sharp	-3.59184	-1.42857	0.632653	2.57143	-0.306122	-1.38776	3.5102	-0.877551	0023	three_four
27	002s5.jpg	umbrella	sharp	No_Shaded	hand	18.4	1	0	0	1	sharp_curved	-3.59184	-1.42857	0.632653	2.57143	-0.306122	-1.38776	3.5102	-0.877551	0025	frontal
27	001s1.jpg	hat	sharp	No_Shaded	computer	47.6	0	1	0	3	curved_sharp	-3.59184	-1.42857	0.632653	2.57143	-0.306122	-1.38776	3.5102	-0.877551	0011	three_four
27	019a4.jpg	duct tape	curved	Shaded	computer	100	0	0	1	2	curved_sharp	-3.59184	-1.42857	0.632653	2.57143	-0.306122	-1.38776	3.5102	-0.877551	0194	three_four
27	040a2.jpg	scissors	curved	Shaded	hand	54.8	1	0	0	1	curved_sharp	-3.59184	-1.42857	0.632653	2.57143	-0.306122	-1.38776	3.5102	-0.877551	0402	three_four
27	034s6.jpg	radio	sharp	Shaded	hand	71.6	0	1	0	3	curved_sharp	-3.59184	-1.42857	0.632653	2.57143	-0.306122	-1.38776	3.5102	-0.877551	0346	frontal
27	034a3.jpg	handle	curved	Shaded	hand	57.6	0	1	0	3	curved_sharp	-3.59184	-1.42857	0.632653	2.57143	-0.306122	-1.38776	3.5102	-0.877551	0343	frontal
27	022a3.jpg	mobile phone	curved	Shaded	hand	90.8	1	0	0	1	curved_sharp	-3.59184	-1.42857	0.632653	2.57143	-0.306122	-1.38776	3.5102	-0.877551	0223	three_four
27	025s5.jpg	glasses	sharp	No_Shaded	hand	48.4	1	0	0	1	sharp_curved	-3.59184	-1.42857	0.632653	2.57143	-0.306122	-1.38776	3.5102	-0.877551	0255	three_four
27	021s3.jpg	toaster	sharp	No_Shaded	computer	11.4	0	1	0	3	sharp_curved	-3.59184	-1.42857	0.632653	2.57143	-0.306122	-1.38776	3.5102	-0.877551	0213	three_four
27	010s1.jpg	handbag	sharp	No_Shaded	computer	46.4	0	0	1	2	curved_sharp	-3.59184	-1.42857	0.632653	2.57143	-0.306122	-1.38776	3.5102	-0.877551	0101	frontal
27	050a5.jpg	tvmonitor	curved	No_Shaded	computer	20.2	0	1	0	3	sharp_curved	-3.59184	-1.42857	0.632653	2.57143	-0.306122	-1.38776	3.5102	-0.877551	0505	frontal
27	025s4.jpg	handle	sharp	No_Shaded	hand	45.6	0	0	1	2	sharp_curved	-3.59184	-1.42857	0.632653	2.57143	-0.306122	-1.38776	3.5102	-0.877551	0254	frontal
27	050s4.jpg	coffee maker	sharp	No_Shaded	computer	38.2	0	1	0	3	curved_sharp	-3.59184	-1.42857	0.632653	2.57143	-0.306122	-1.38776	3.5102	-0.877551	0504	frontal
27	001a1.jpg	hat	curved	No_Shaded	computer	22	0	1	0	3	curved_sharp	-3.59184	-1.42857	0.632653	2.57143	-0.306122	-1.38776	3.5102	-0.877551	0011	three_four
27	027s2.jpg	electric guitar	sharp	No_Shaded	computer	76	1	0	0	1	curved_sharp	-3.59184	-1.42857	0.632653	2.57143	-0.306122	-1.38776	3.5102	-0.877551	0272	frontal
27	016s6.jpg	watch	sharp	No_Shaded	hand	48.8	1	0	0	1	curved_sharp	-3.59184	-1.42857	0.632653	2.57143	-0.306122	-1.38776	3.5102	-0.877551	0166	frontal
27	040a7.jpg	pencil sharpener	curved	Shaded	hand	75.6	1	0	0	1	sharp_curved	-3.59184	-1.42857	0.632653	2.57143	-0.306122	-1.38776	3.5102	-0.877551	0407	three_four
27	039s3.jpg	glass	sharp	Shaded	hand	53.2	1	0	0	1	sharp_curved	-3.59184	-1.42857	0.632653	2.57143	-0.306122	-1.38776	3.5102	-0.877551	0393	frontal
27	001a3.jpg	pen	curved	No_Shaded	computer	47.8	1	0	0	1	curved_sharp	-3.59184	-1.42857	0.632653	2.57143	-0.306122	-1.38776	3.5102	-0.877551	0013	three_four
27	010a7.jpg	remote control	curved	No_Shaded	hand	11.8	0	0	1	2	sharp_curved	-3.59184	-1.42857	0.632653	2.57143	-0.306122	-1.38776	3.5102	-0.877551	0107	three_four
27	049a4.jpg	lamp	curved	No_Shaded	hand	85.6	0	0	1	2	curved_sharp	-3.59184	-1.42857	0.632653	2.57143	-0.306122	-1.38776	3.5102	-0.877551	0494	frontal
27	019a5.jpg	tap	curved	Shaded	computer	87	0	1	0	3	sharp_curved	-3.59184	-1.42857	0.632653	2.57143	-0.306122	-1.38776	3.5102	-0.877551	0195	three_four
27	019s4.jpg	duct tape	sharp	Shaded	computer	100	0	0	1	2	curved_sharp	-3.59184	-1.42857	0.632653	2.57143	-0.306122	-1.38776	3.5102	-0.877551	0194	three_four
27	008s1.jpg	mirror	sharp	No_Shaded	computer	69.8	1	0	0	1	sharp_curved	-3.59184	-1.42857	0.632653	2.57143	-0.306122	-1.38776	3.5102	-0.877551	0081	three_four
27	021a3.jpg	toaster	curved	No_Shaded	computer	92	0	1	0	3	sharp_curved	-3.59184	-1.42857	0.632653	2.57143	-0.306122	-1.38776	3.5102	-0.877551	0213	three_four
27	022s3.jpg	mobile phone	sharp	Shaded	hand	78.8	1	0	0	1	curved_sharp	-3.59184	-1.42857	0.632653	2.57143	-0.306122	-1.38776	3.5102	-0.877551	0223	three_four
27	010s6.jpg	mirror	sharp	No_Shaded	computer	41.8	1	0	0	1	sharp_curved	-3.59184	-1.42857	0.632653	2.57143	-0.306122	-1.38776	3.5102	-0.877551	0106	frontal
27	033a6.jpg	teapot	curved	No_Shaded	hand	36	1	0	0	1	curved_sharp	-3.59184	-1.42857	0.632653	2.57143	-0.306122	-1.38776	3.5102	-0.877551	0336	frontal
27	025a5.jpg	glasses	curved	No_Shaded	hand	51.2	1	0	0	1	sharp_curved	-3.59184	-1.42857	0.632653	2.57143	-0.306122	-1.38776	3.5102	-0.877551	0255	three_four
27	034a1.jpg	jug	curved	Shaded	hand	70	1	0	0	1	curved_sharp	-3.59184	-1.42857	0.632653	2.57143	-0.306122	-1.38776	3.5102	-0.877551	0341	frontal
27	021s4.jpg	remote control	sharp	No_Shaded	computer	33.6	1	0	0	1	sharp_curved	-3.59184	-1.42857	0.632653	2.57143	-0.306122	-1.38776	3.5102	-0.877551	0214	three_four
27	050a4.jpg	coffee maker	curved	No_Shaded	computer	28	0	1	0	3	curved_sharp	-3.59184	-1.42857	0.632653	2.57143	-0.306122	-1.38776	3.5102	-0.877551	0504	frontal
27	034a4.jpg	sponge	curved	Shaded	hand	74.2	1	0	0	1	sharp_curved	-3.59184	-1.42857	0.632653	2.57143	-0.306122	-1.38776	3.5102	-0.877551	0344	three_four
27	017s1.jpg	lighter	sharp	Shaded	hand	42.2	1	0	0	1	curved_sharp	-3.59184	-1.42857	0.632653	2.57143	-0.306122	-1.38776	3.5102	-0.877551	0171	three_four
27	052s2.jpg	photo frame	sharp	No_Shaded	computer	45.6	0	0	1	2	curved_sharp	-3.59184	-1.42857	0.632653	2.57143	-0.306122	-1.38776	3.5102	-0.877551	0522	three_four
27	050a7.jpg	mobile phone	curved	No_Shaded	computer	65.8	1	0	0	1	curved_sharp	-3.59184	-1.42857	0.632653	2.57143	-0.306122	-1.38776	3.5102	-0.877551	0507	frontal
27	010a4.jpg	clock	curved	No_Shaded	computer	79.4	1	0	0	1	sharp_curved	-3.59184	-1.42857	0.632653	2.57143	-0.306122	-1.38776	3.5102	-0.877551	0104	frontal
27	033s6.jpg	teapot	sharp	No_Shaded	hand	0.4	1	0	0	1	curved_sharp	-3.59184	-1.42857	0.632653	2.57143	-0.306122	-1.38776	3.5102	-0.877551	0336	frontal
27	049s1.jpg	backpack	sharp	No_Shaded	hand	59.8	0	0	1	2	sharp_curved	-3.59184	-1.42857	0.632653	2.57143	-0.306122	-1.38776	3.5102	-0.877551	0491	three_four
27	014s5.jpg	cap	sharp	No_Shaded	hand	44.8	0	0	1	2	curved_sharp	-3.59184	-1.42857	0.632653	2.57143	-0.306122	-1.38776	3.5102	-0.877551	0145	three_four
27	025a6.jpg	comb	curved	No_Shaded	hand	34.8	1	0	0	1	curved_sharp	-3.59184	-1.42857	0.632653	2.57143	-0.306122	-1.38776	3.5102	-0.877551	0256	frontal
27	049s2.jpg	tv	sharp	No_Shaded	hand	44.6	1	0	0	1	sharp_curved	-3.59184	-1.42857	0.632653	2.57143	-0.306122	-1.38776	3.5102	-0.877551	0492	frontal
27	050s7.jpg	mobile phone	sharp	No_Shaded	computer	50.2	1	0	0	1	curved_sharp	-3.59184	-1.42857	0.632653	2.57143	-0.306122	-1.38776	3.5102	-0.877551	0507	frontal
27	016a6.jpg	watch	curved	No_Shaded	hand	47.2	1	0	0	1	curved_sharp	-3.59184	-1.42857	0.632653	2.57143	-0.306122	-1.38776	3.5102	-0.877551	0166	frontal
27	010a1.jpg	handbag	curved	No_Shaded	computer	46.4	0	0	1	2	curved_sharp	-3.59184	-1.42857	0.632653	2.57143	-0.306122	-1.38776	3.5102	-0.877551	0101	frontal
27	019s5.jpg	tap	sharp	Shaded	computer	92.6	0	1	0	3	sharp_curved	-3.59184	-1.42857	0.632653	2.57143	-0.306122	-1.38776	3.5102	-0.877551	0195	three_four
27	049a2.jpg	tv	curved	No_Shaded	hand	52	1	0	0	1	sharp_curved	-3.59184	-1.42857	0.632653	2.57143	-0.306122	-1.38776	3.5102	-0.877551	0492	frontal
27	049s4.jpg	lamp	sharp	No_Shaded	hand	33.8	0	0	1	2	curved_sharp	-3.59184	-1.42857	0.632653	2.57143	-0.306122	-1.38776	3.5102	-0.877551	0494	frontal
27	022s4.jpg	glass/cup	sharp	Shaded	hand	90.4	1	0	0	1	sharp_curved	-3.59184	-1.42857	0.632653	2.57143	-0.306122	-1.38776	3.5102	-0.877551	0224	frontal
27	052a2.jpg	photo frame	curved	No_Shaded	computer	49.6	0	0	1	2	curved_sharp	-3.59184	-1.42857	0.632653	2.57143	-0.306122	-1.38776	3.5102	-0.877551	0522	three_four
27	014a5.jpg	cap	curved	No_Shaded	hand	63.8	0	0	1	2	curved_sharp	-3.59184	-1.42857	0.632653	2.57143	-0.306122	-1.38776	3.5102	-0.877551	0145	three_four
27	027a2.jpg	electric guitar	curved	No_Shaded	computer	89.4	1	0	0	1	curved_sharp	-3.59184	-1.42857	0.632653	2.57143	-0.306122	-1.38776	3.5102	-0.877551	0272	frontal
27	016s4.jpg	lightbulb	sharp	No_Shaded	hand	34.2	1	0	0	1	curved_sharp	-3.59184	-1.42857	0.632653	2.57143	-0.306122	-1.38776	3.5102	-0.877551	0164	frontal
27	012a6.jpg	door	curved	No_Shaded	hand	40.4	0	1	0	3	sharp_curved	-3.59184	-1.42857	0.632653	2.57143	-0.306122	-1.38776	3.5102	-0.877551	0126	frontal
27	010s4.jpg	clock	sharp	No_Shaded	computer	47.4	1	0	0	1	sharp_curved	-3.59184	-1.42857	0.632653	2.57143	-0.306122	-1.38776	3.5102	-0.877551	0104	frontal
27	040s5.jpg	watch	sharp	Shaded	hand	11.6	1	0	0	1	sharp_curved	-3.59184	-1.42857	0.632653	2.57143	-0.306122	-1.38776	3.5102	-0.877551	0405	three_four
28	001s1.jpg	hat	sharp	No_Shaded	computer	27.4	0	1	0	3	curved_sharp	4.40816	2.57143	1.63265	-2.42857	-1.30612	-1.38776	0.510204	9.12245	0011	three_four
28	049s4.jpg	lamp	sharp	No_Shaded	hand	63.8	1	0	0	1	sharp_curved	4.40816	2.57143	1.63265	-2.42857	-1.30612	-1.38776	0.510204	9.12245	0494	frontal
28	052a2.jpg	photo frame	curved	No_Shaded	computer	58.6	0	0	1	2	sharp_curved	4.40816	2.57143	1.63265	-2.42857	-1.30612	-1.38776	0.510204	9.12245	0522	three_four
28	025s6.jpg	comb	sharp	No_Shaded	hand	1.6	1	0	0	1	sharp_curved	4.40816	2.57143	1.63265	-2.42857	-1.30612	-1.38776	0.510204	9.12245	0256	frontal
28	050s5.jpg	tvmonitor	sharp	No_Shaded	computer	20.2	0	0	1	2	sharp_curved	4.40816	2.57143	1.63265	-2.42857	-1.30612	-1.38776	0.510204	9.12245	0505	frontal
28	010s7.jpg	remote control	sharp	No_Shaded	hand	54.6	0	0	1	2	curved_sharp	4.40816	2.57143	1.63265	-2.42857	-1.30612	-1.38776	0.510204	9.12245	0107	three_four
28	010a3.jpg	glasses	curved	No_Shaded	hand	99	1	0	0	1	curved_sharp	4.40816	2.57143	1.63265	-2.42857	-1.30612	-1.38776	0.510204	9.12245	0103	frontal
28	050a7.jpg	mobile phone	curved	No_Shaded	computer	17.4	1	0	0	1	sharp_curved	4.40816	2.57143	1.63265	-2.42857	-1.30612	-1.38776	0.510204	9.12245	0507	frontal
28	050s4.jpg	coffee maker	sharp	No_Shaded	computer	46.6	0	0	1	2	curved_sharp	4.40816	2.57143	1.63265	-2.42857	-1.30612	-1.38776	0.510204	9.12245	0504	frontal
28	034a4.jpg	sponge	curved	Shaded	hand	66.2	1	0	0	1	sharp_curved	4.40816	2.57143	1.63265	-2.42857	-1.30612	-1.38776	0.510204	9.12245	0344	three_four
28	012a6.jpg	door	curved	No_Shaded	hand	12.4	0	1	0	3	sharp_curved	4.40816	2.57143	1.63265	-2.42857	-1.30612	-1.38776	0.510204	9.12245	0126	frontal
28	049a4.jpg	lamp	curved	No_Shaded	hand	88.6	1	0	0	1	sharp_curved	4.40816	2.57143	1.63265	-2.42857	-1.30612	-1.38776	0.510204	9.12245	0494	frontal
28	040a2.jpg	scissors	curved	Shaded	hand	94.2	1	0	0	1	curved_sharp	4.40816	2.57143	1.63265	-2.42857	-1.30612	-1.38776	0.510204	9.12245	0402	three_four
28	001s3.jpg	pen	sharp	No_Shaded	computer	20	1	0	0	1	curved_sharp	4.40816	2.57143	1.63265	-2.42857	-1.30612	-1.38776	0.510204	9.12245	0013	three_four
28	034a6.jpg	radio	curved	Shaded	hand	100	1	0	0	1	sharp_curved	4.40816	2.57143	1.63265	-2.42857	-1.30612	-1.38776	0.510204	9.12245	0346	frontal
28	019a5.jpg	tap	curved	Shaded	computer	98.6	0	1	0	3	curved_sharp	4.40816	2.57143	1.63265	-2.42857	-1.30612	-1.38776	0.510204	9.12245	0195	three_four
28	010s4.jpg	clock	sharp	No_Shaded	computer	29.8	0	0	1	2	sharp_curved	4.40816	2.57143	1.63265	-2.42857	-1.30612	-1.38776	0.510204	9.12245	0104	frontal
28	016a6.jpg	watch	curved	No_Shaded	hand	98.4	0	1	0	3	curved_sharp	4.40816	2.57143	1.63265	-2.42857	-1.30612	-1.38776	0.510204	9.12245	0166	frontal
28	049s1.jpg	backpack	sharp	No_Shaded	hand	83.6	1	0	0	1	sharp_curved	4.40816	2.57143	1.63265	-2.42857	-1.30612	-1.38776	0.510204	9.12245	0491	three_four
28	010s1.jpg	handbag	sharp	No_Shaded	computer	8	1	0	0	1	curved_sharp	4.40816	2.57143	1.63265	-2.42857	-1.30612	-1.38776	0.510204	9.12245	0101	frontal
28	025a5.jpg	glasses	curved	No_Shaded	hand	99	1	0	0	1	curved_sharp	4.40816	2.57143	1.63265	-2.42857	-1.30612	-1.38776	0.510204	9.12245	0255	three_four
28	025a6.jpg	comb	curved	No_Shaded	hand	77.6	1	0	0	1	sharp_curved	4.40816	2.57143	1.63265	-2.42857	-1.30612	-1.38776	0.510204	9.12245	0256	frontal
28	019s5.jpg	tap	sharp	Shaded	computer	99	0	1	0	3	curved_sharp	4.40816	2.57143	1.63265	-2.42857	-1.30612	-1.38776	0.510204	9.12245	0195	three_four
28	001a1.jpg	hat	curved	No_Shaded	computer	34.4	0	1	0	3	curved_sharp	4.40816	2.57143	1.63265	-2.42857	-1.30612	-1.38776	0.510204	9.12245	0011	three_four
28	019a4.jpg	duct tape	curved	Shaded	computer	99	0	1	0	3	sharp_curved	4.40816	2.57143	1.63265	-2.42857	-1.30612	-1.38776	0.510204	9.12245	0194	three_four
28	049a2.jpg	tv	curved	No_Shaded	hand	86.2	0	1	0	3	curved_sharp	4.40816	2.57143	1.63265	-2.42857	-1.30612	-1.38776	0.510204	9.12245	0492	frontal
28	025s4.jpg	handle	sharp	No_Shaded	hand	5.4	0	0	1	2	curved_sharp	4.40816	2.57143	1.63265	-2.42857	-1.30612	-1.38776	0.510204	9.12245	0254	frontal
28	017s1.jpg	lighter	sharp	Shaded	hand	98.8	1	0	0	1	curved_sharp	4.40816	2.57143	1.63265	-2.42857	-1.30612	-1.38776	0.510204	9.12245	0171	three_four
28	008a1.jpg	mirror	curved	No_Shaded	computer	6.6	0	0	1	2	curved_sharp	4.40816	2.57143	1.63265	-2.42857	-1.30612	-1.38776	0.510204	9.12245	0081	three_four
28	050a5.jpg	tvmonitor	curved	No_Shaded	computer	4	0	0	1	2	sharp_curved	4.40816	2.57143	1.63265	-2.42857	-1.30612	-1.38776	0.510204	9.12245	0505	frontal
28	021a4.jpg	remote control	curved	No_Shaded	computer	57.6	0	0	1	2	curved_sharp	4.40816	2.57143	1.63265	-2.42857	-1.30612	-1.38776	0.510204	9.12245	0214	three_four
28	002a3.jpg	lamp	curved	No_Shaded	hand	32.8	1	0	0	1	curved_sharp	4.40816	2.57143	1.63265	-2.42857	-1.30612	-1.38776	0.510204	9.12245	0023	three_four
28	022s3.jpg	mobile phone	sharp	Shaded	hand	96	1	0	0	1	sharp_curved	4.40816	2.57143	1.63265	-2.42857	-1.30612	-1.38776	0.510204	9.12245	0223	three_four
28	034s4.jpg	sponge	sharp	Shaded	hand	87.2	1	0	0	1	sharp_curved	4.40816	2.57143	1.63265	-2.42857	-1.30612	-1.38776	0.510204	9.12245	0344	three_four
28	016s4.jpg	lightbulb	sharp	No_Shaded	hand	28	1	0	0	1	sharp_curved	4.40816	2.57143	1.63265	-2.42857	-1.30612	-1.38776	0.510204	9.12245	0164	frontal
28	021a3.jpg	toaster	curved	No_Shaded	computer	81.6	0	0	1	2	sharp_curved	4.40816	2.57143	1.63265	-2.42857	-1.30612	-1.38776	0.510204	9.12245	0213	three_four
28	010a7.jpg	remote control	curved	No_Shaded	hand	55.6	0	0	1	2	curved_sharp	4.40816	2.57143	1.63265	-2.42857	-1.30612	-1.38776	0.510204	9.12245	0107	three_four
28	025a4.jpg	handle	curved	No_Shaded	hand	8.6	0	0	1	2	curved_sharp	4.40816	2.57143	1.63265	-2.42857	-1.30612	-1.38776	0.510204	9.12245	0254	frontal
28	022s4.jpg	glass/cup	sharp	Shaded	hand	98	0	0	1	2	curved_sharp	4.40816	2.57143	1.63265	-2.42857	-1.30612	-1.38776	0.510204	9.12245	0224	frontal
28	039s1.jpg	coffee maker	sharp	Shaded	hand	99	0	1	0	3	curved_sharp	4.40816	2.57143	1.63265	-2.42857	-1.30612	-1.38776	0.510204	9.12245	0391	frontal
28	016a4.jpg	lightbulb	curved	No_Shaded	hand	79.8	1	0	0	1	sharp_curved	4.40816	2.57143	1.63265	-2.42857	-1.30612	-1.38776	0.510204	9.12245	0164	frontal
28	049s2.jpg	tv	sharp	No_Shaded	hand	66.8	0	1	0	3	curved_sharp	4.40816	2.57143	1.63265	-2.42857	-1.30612	-1.38776	0.510204	9.12245	0492	frontal
28	022a3.jpg	mobile phone	curved	Shaded	hand	98.4	1	0	0	1	sharp_curved	4.40816	2.57143	1.63265	-2.42857	-1.30612	-1.38776	0.510204	9.12245	0223	three_four
28	001a3.jpg	pen	curved	No_Shaded	computer	94.6	1	0	0	1	curved_sharp	4.40816	2.57143	1.63265	-2.42857	-1.30612	-1.38776	0.510204	9.12245	0013	three_four
28	022a4.jpg	glass/cup	curved	Shaded	hand	97.8	0	0	1	2	curved_sharp	4.40816	2.57143	1.63265	-2.42857	-1.30612	-1.38776	0.510204	9.12245	0224	frontal
28	017a5.jpg	headphones	curved	No_Shaded	hand	46.6	0	1	0	3	curved_sharp	4.40816	2.57143	1.63265	-2.42857	-1.30612	-1.38776	0.510204	9.12245	0175	frontal
28	050s7.jpg	mobile phone	sharp	No_Shaded	computer	26.8	1	0	0	1	sharp_curved	4.40816	2.57143	1.63265	-2.42857	-1.30612	-1.38776	0.510204	9.12245	0507	frontal
28	019s4.jpg	duct tape	sharp	Shaded	computer	96.8	0	1	0	3	sharp_curved	4.40816	2.57143	1.63265	-2.42857	-1.30612	-1.38776	0.510204	9.12245	0194	three_four
28	033s6.jpg	teapot	sharp	No_Shaded	hand	3.8	1	0	0	1	curved_sharp	4.40816	2.57143	1.63265	-2.42857	-1.30612	-1.38776	0.510204	9.12245	0336	frontal
28	012s6.jpg	door	sharp	No_Shaded	hand	21	0	1	0	3	sharp_curved	4.40816	2.57143	1.63265	-2.42857	-1.30612	-1.38776	0.510204	9.12245	0126	frontal
28	010a6.jpg	mirror	curved	No_Shaded	computer	29.6	0	0	1	2	sharp_curved	4.40816	2.57143	1.63265	-2.42857	-1.30612	-1.38776	0.510204	9.12245	0106	frontal
28	016s6.jpg	watch	sharp	No_Shaded	hand	39	0	1	0	3	curved_sharp	4.40816	2.57143	1.63265	-2.42857	-1.30612	-1.38776	0.510204	9.12245	0166	frontal
28	017s5.jpg	headphones	sharp	No_Shaded	hand	59	0	1	0	3	curved_sharp	4.40816	2.57143	1.63265	-2.42857	-1.30612	-1.38776	0.510204	9.12245	0175	frontal
28	034s1.jpg	jug	sharp	Shaded	hand	52.2	1	0	0	1	sharp_curved	4.40816	2.57143	1.63265	-2.42857	-1.30612	-1.38776	0.510204	9.12245	0341	frontal
28	040s6.jpg	chair	sharp	Shaded	hand	60.2	1	0	0	1	sharp_curved	4.40816	2.57143	1.63265	-2.42857	-1.30612	-1.38776	0.510204	9.12245	0406	three_four
28	039a1.jpg	coffee maker	curved	Shaded	hand	65.8	0	1	0	3	curved_sharp	4.40816	2.57143	1.63265	-2.42857	-1.30612	-1.38776	0.510204	9.12245	0391	frontal
28	040s7.jpg	pencil sharpener	sharp	Shaded	hand	87.8	0	1	0	3	curved_sharp	4.40816	2.57143	1.63265	-2.42857	-1.30612	-1.38776	0.510204	9.12245	0407	three_four
28	014s5.jpg	cap	sharp	No_Shaded	hand	91	1	0	0	1	sharp_curved	4.40816	2.57143	1.63265	-2.42857	-1.30612	-1.38776	0.510204	9.12245	0145	three_four
28	002s3.jpg	lamp	sharp	No_Shaded	hand	57.8	1	0	0	1	curved_sharp	4.40816	2.57143	1.63265	-2.42857	-1.30612	-1.38776	0.510204	9.12245	0023	three_four
28	025s5.jpg	glasses	sharp	No_Shaded	hand	22.6	1	0	0	1	curved_sharp	4.40816	2.57143	1.63265	-2.42857	-1.30612	-1.38776	0.510204	9.12245	0255	three_four
28	040a5.jpg	watch	curved	Shaded	hand	86.4	1	0	0	1	sharp_curved	4.40816	2.57143	1.63265	-2.42857	-1.30612	-1.38776	0.510204	9.12245	0405	three_four
28	027a2.jpg	electric guitar	curved	No_Shaded	computer	43.4	0	0	1	2	curved_sharp	4.40816	2.57143	1.63265	-2.42857	-1.30612	-1.38776	0.510204	9.12245	0272	frontal
28	034a3.jpg	handle	curved	Shaded	hand	69	0	1	0	3	curved_sharp	4.40816	2.57143	1.63265	-2.42857	-1.30612	-1.38776	0.510204	9.12245	0343	frontal
28	033s3.jpg	toaster	sharp	No_Shaded	hand	87.4	1	0	0	1	sharp_curved	4.40816	2.57143	1.63265	-2.42857	-1.30612	-1.38776	0.510204	9.12245	0333	three_four
28	050a4.jpg	coffee maker	curved	No_Shaded	computer	13.8	0	0	1	2	curved_sharp	4.40816	2.57143	1.63265	-2.42857	-1.30612	-1.38776	0.510204	9.12245	0504	frontal
28	010a1.jpg	handbag	curved	No_Shaded	computer	10.2	1	0	0	1	curved_sharp	4.40816	2.57143	1.63265	-2.42857	-1.30612	-1.38776	0.510204	9.12245	0101	frontal
28	027s2.jpg	electric guitar	sharp	No_Shaded	computer	9.8	0	0	1	2	curved_sharp	4.40816	2.57143	1.63265	-2.42857	-1.30612	-1.38776	0.510204	9.12245	0272	frontal
28	034s6.jpg	radio	sharp	Shaded	hand	77.4	1	0	0	1	sharp_curved	4.40816	2.57143	1.63265	-2.42857	-1.30612	-1.38776	0.510204	9.12245	0346	frontal
28	017a1.jpg	lighter	curved	Shaded	hand	94.4	1	0	0	1	curved_sharp	4.40816	2.57143	1.63265	-2.42857	-1.30612	-1.38776	0.510204	9.12245	0171	three_four
28	039s3.jpg	glass	sharp	Shaded	hand	70.8	0	0	1	2	sharp_curved	4.40816	2.57143	1.63265	-2.42857	-1.30612	-1.38776	0.510204	9.12245	0393	frontal
28	010s6.jpg	mirror	sharp	No_Shaded	computer	16.2	0	0	1	2	sharp_curved	4.40816	2.57143	1.63265	-2.42857	-1.30612	-1.38776	0.510204	9.12245	0106	frontal
28	040s2.jpg	scissors	sharp	Shaded	hand	99	1	0	0	1	curved_sharp	4.40816	2.57143	1.63265	-2.42857	-1.30612	-1.38776	0.510204	9.12245	0402	three_four
28	040s5.jpg	watch	sharp	Shaded	hand	98.8	1	0	0	1	sharp_curved	4.40816	2.57143	1.63265	-2.42857	-1.30612	-1.38776	0.510204	9.12245	0405	three_four
28	040a6.jpg	chair	curved	Shaded	hand	98.6	1	0	0	1	sharp_curved	4.40816	2.57143	1.63265	-2.42857	-1.30612	-1.38776	0.510204	9.12245	0406	three_four
28	008s1.jpg	mirror	sharp	No_Shaded	computer	23	0	0	1	2	curved_sharp	4.40816	2.57143	1.63265	-2.42857	-1.30612	-1.38776	0.510204	9.12245	0081	three_four
28	010s3.jpg	glasses	sharp	No_Shaded	hand	54.8	1	0	0	1	curved_sharp	4.40816	2.57143	1.63265	-2.42857	-1.30612	-1.38776	0.510204	9.12245	0103	frontal
28	052s2.jpg	photo frame	sharp	No_Shaded	computer	29.8	0	0	1	2	sharp_curved	4.40816	2.57143	1.63265	-2.42857	-1.30612	-1.38776	0.510204	9.12245	0522	three_four
28	014a5.jpg	cap	curved	No_Shaded	hand	85.6	1	0	0	1	sharp_curved	4.40816	2.57143	1.63265	-2.42857	-1.30612	-1.38776	0.510204	9.12245	0145	three_four
28	002a5.jpg	umbrella	curved	No_Shaded	hand	43.8	1	0	0	1	sharp_curved	4.40816	2.57143	1.63265	-2.42857	-1.30612	-1.38776	0.510204	9.12245	0025	frontal
28	049a1.jpg	backpack	curved	No_Shaded	hand	50.2	1	0	0	1	sharp_curved	4.40816	2.57143	1.63265	-2.42857	-1.30612	-1.38776	0.510204	9.12245	0491	three_four
28	021s4.jpg	remote control	sharp	No_Shaded	computer	54.6	0	0	1	2	curved_sharp	4.40816	2.57143	1.63265	-2.42857	-1.30612	-1.38776	0.510204	9.12245	0214	three_four
28	010a4.jpg	clock	curved	No_Shaded	computer	34.6	0	0	1	2	sharp_curved	4.40816	2.57143	1.63265	-2.42857	-1.30612	-1.38776	0.510204	9.12245	0104	frontal
28	034s3.jpg	handle	sharp	Shaded	hand	25	0	1	0	3	curved_sharp	4.40816	2.57143	1.63265	-2.42857	-1.30612	-1.38776	0.510204	9.12245	0343	frontal
28	039a3.jpg	glass	curved	Shaded	hand	93	0	0	1	2	sharp_curved	4.40816	2.57143	1.63265	-2.42857	-1.30612	-1.38776	0.510204	9.12245	0393	frontal
28	033a6.jpg	teapot	curved	No_Shaded	hand	11.6	1	0	0	1	curved_sharp	4.40816	2.57143	1.63265	-2.42857	-1.30612	-1.38776	0.510204	9.12245	0336	frontal
28	002s5.jpg	umbrella	sharp	No_Shaded	hand	19.2	1	0	0	1	sharp_curved	4.40816	2.57143	1.63265	-2.42857	-1.30612	-1.38776	0.510204	9.12245	0025	frontal
28	040a7.jpg	pencil sharpener	curved	Shaded	hand	72.4	0	1	0	3	curved_sharp	4.40816	2.57143	1.63265	-2.42857	-1.30612	-1.38776	0.510204	9.12245	0407	three_four
28	034a1.jpg	jug	curved	Shaded	hand	59.2	1	0	0	1	sharp_curved	4.40816	2.57143	1.63265	-2.42857	-1.30612	-1.38776	0.510204	9.12245	0341	frontal
28	021s3.jpg	toaster	sharp	No_Shaded	computer	56.6	0	0	1	2	sharp_curved	4.40816	2.57143	1.63265	-2.42857	-1.30612	-1.38776	0.510204	9.12245	0213	three_four
28	033a3.jpg	toaster	curved	No_Shaded	hand	62.2	1	0	0	1	sharp_curved	4.40816	2.57143	1.63265	-2.42857	-1.30612	-1.38776	0.510204	9.12245	0333	three_four
29	050a7.jpg	mobile phone	curved	No_Shaded	computer	62	1	0	0	1	sharp_curved	-4.59184	-1.42857	-0.367347	-1.42857	-2.30612	-0.387755	-3.4898	6.12245	0507	frontal
29	010s3.jpg	glasses	sharp	No_Shaded	hand	45.4	0	0	1	2	sharp_curved	-4.59184	-1.42857	-0.367347	-1.42857	-2.30612	-0.387755	-3.4898	6.12245	0103	frontal
29	010s6.jpg	mirror	sharp	No_Shaded	computer	55	1	0	0	1	sharp_curved	-4.59184	-1.42857	-0.367347	-1.42857	-2.30612	-0.387755	-3.4898	6.12245	0106	frontal
29	017s1.jpg	lighter	sharp	Shaded	hand	53.8	1	0	0	1	sharp_curved	-4.59184	-1.42857	-0.367347	-1.42857	-2.30612	-0.387755	-3.4898	6.12245	0171	three_four
29	014s5.jpg	cap	sharp	No_Shaded	hand	17.8	0	0	1	2	sharp_curved	-4.59184	-1.42857	-0.367347	-1.42857	-2.30612	-0.387755	-3.4898	6.12245	0145	three_four
29	034a3.jpg	handle	curved	Shaded	hand	16.8	0	1	0	3	curved_sharp	-4.59184	-1.42857	-0.367347	-1.42857	-2.30612	-0.387755	-3.4898	6.12245	0343	frontal
29	025s5.jpg	glasses	sharp	No_Shaded	hand	61.6	1	0	0	1	sharp_curved	-4.59184	-1.42857	-0.367347	-1.42857	-2.30612	-0.387755	-3.4898	6.12245	0255	three_four
29	025a4.jpg	handle	curved	No_Shaded	hand	50.6	0	0	1	2	sharp_curved	-4.59184	-1.42857	-0.367347	-1.42857	-2.30612	-0.387755	-3.4898	6.12245	0254	frontal
29	034s6.jpg	radio	sharp	Shaded	hand	63.2	0	0	1	2	curved_sharp	-4.59184	-1.42857	-0.367347	-1.42857	-2.30612	-0.387755	-3.4898	6.12245	0346	frontal
29	010a7.jpg	remote control	curved	No_Shaded	hand	9.2	1	0	0	1	sharp_curved	-4.59184	-1.42857	-0.367347	-1.42857	-2.30612	-0.387755	-3.4898	6.12245	0107	three_four
29	039a3.jpg	glass	curved	Shaded	hand	53.2	1	0	0	1	curved_sharp	-4.59184	-1.42857	-0.367347	-1.42857	-2.30612	-0.387755	-3.4898	6.12245	0393	frontal
29	049s1.jpg	backpack	sharp	No_Shaded	hand	63.2	0	0	1	2	sharp_curved	-4.59184	-1.42857	-0.367347	-1.42857	-2.30612	-0.387755	-3.4898	6.12245	0491	three_four
29	002s5.jpg	umbrella	sharp	No_Shaded	hand	16.2	0	0	1	2	sharp_curved	-4.59184	-1.42857	-0.367347	-1.42857	-2.30612	-0.387755	-3.4898	6.12245	0025	frontal
29	019a4.jpg	duct tape	curved	Shaded	computer	15.6	0	1	0	3	curved_sharp	-4.59184	-1.42857	-0.367347	-1.42857	-2.30612	-0.387755	-3.4898	6.12245	0194	three_four
29	033s3.jpg	toaster	sharp	No_Shaded	hand	47.8	0	1	0	3	sharp_curved	-4.59184	-1.42857	-0.367347	-1.42857	-2.30612	-0.387755	-3.4898	6.12245	0333	three_four
29	016a6.jpg	watch	curved	No_Shaded	hand	47.4	0	0	1	2	curved_sharp	-4.59184	-1.42857	-0.367347	-1.42857	-2.30612	-0.387755	-3.4898	6.12245	0166	frontal
29	016a4.jpg	lightbulb	curved	No_Shaded	hand	16.4	0	1	0	3	sharp_curved	-4.59184	-1.42857	-0.367347	-1.42857	-2.30612	-0.387755	-3.4898	6.12245	0164	frontal
29	010a6.jpg	mirror	curved	No_Shaded	computer	71.4	1	0	0	1	sharp_curved	-4.59184	-1.42857	-0.367347	-1.42857	-2.30612	-0.387755	-3.4898	6.12245	0106	frontal
29	022a4.jpg	glass/cup	curved	Shaded	hand	54	1	0	0	1	sharp_curved	-4.59184	-1.42857	-0.367347	-1.42857	-2.30612	-0.387755	-3.4898	6.12245	0224	frontal
29	034s1.jpg	jug	sharp	Shaded	hand	17	0	0	1	2	sharp_curved	-4.59184	-1.42857	-0.367347	-1.42857	-2.30612	-0.387755	-3.4898	6.12245	0341	frontal
29	050a4.jpg	coffee maker	curved	No_Shaded	computer	45	0	1	0	3	sharp_curved	-4.59184	-1.42857	-0.367347	-1.42857	-2.30612	-0.387755	-3.4898	6.12245	0504	frontal
29	052a2.jpg	photo frame	curved	No_Shaded	computer	21.6	0	1	0	3	sharp_curved	-4.59184	-1.42857	-0.367347	-1.42857	-2.30612	-0.387755	-3.4898	6.12245	0522	three_four
29	040a2.jpg	scissors	curved	Shaded	hand	58.8	1	0	0	1	sharp_curved	-4.59184	-1.42857	-0.367347	-1.42857	-2.30612	-0.387755	-3.4898	6.12245	0402	three_four
29	001s1.jpg	hat	sharp	No_Shaded	computer	49	0	1	0	3	curved_sharp	-4.59184	-1.42857	-0.367347	-1.42857	-2.30612	-0.387755	-3.4898	6.12245	0011	three_four
29	033s6.jpg	teapot	sharp	No_Shaded	hand	17.2	1	0	0	1	sharp_curved	-4.59184	-1.42857	-0.367347	-1.42857	-2.30612	-0.387755	-3.4898	6.12245	0336	frontal
29	016s4.jpg	lightbulb	sharp	No_Shaded	hand	23.4	0	1	0	3	sharp_curved	-4.59184	-1.42857	-0.367347	-1.42857	-2.30612	-0.387755	-3.4898	6.12245	0164	frontal
29	040s5.jpg	watch	sharp	Shaded	hand	61.4	0	0	1	2	curved_sharp	-4.59184	-1.42857	-0.367347	-1.42857	-2.30612	-0.387755	-3.4898	6.12245	0405	three_four
29	021a3.jpg	toaster	curved	No_Shaded	computer	47.4	0	1	0	3	curved_sharp	-4.59184	-1.42857	-0.367347	-1.42857	-2.30612	-0.387755	-3.4898	6.12245	0213	three_four
29	008a1.jpg	mirror	curved	No_Shaded	computer	65.2	0	0	1	2	curved_sharp	-4.59184	-1.42857	-0.367347	-1.42857	-2.30612	-0.387755	-3.4898	6.12245	0081	three_four
29	034s4.jpg	sponge	sharp	Shaded	hand	47.8	0	0	1	2	sharp_curved	-4.59184	-1.42857	-0.367347	-1.42857	-2.30612	-0.387755	-3.4898	6.12245	0344	three_four
29	050a5.jpg	tvmonitor	curved	No_Shaded	computer	34.4	0	1	0	3	curved_sharp	-4.59184	-1.42857	-0.367347	-1.42857	-2.30612	-0.387755	-3.4898	6.12245	0505	frontal
29	022s4.jpg	glass/cup	sharp	Shaded	hand	50.4	1	0	0	1	sharp_curved	-4.59184	-1.42857	-0.367347	-1.42857	-2.30612	-0.387755	-3.4898	6.12245	0224	frontal
29	052s2.jpg	photo frame	sharp	No_Shaded	computer	59.4	0	1	0	3	sharp_curved	-4.59184	-1.42857	-0.367347	-1.42857	-2.30612	-0.387755	-3.4898	6.12245	0522	three_four
29	025a5.jpg	glasses	curved	No_Shaded	hand	65.6	1	0	0	1	sharp_curved	-4.59184	-1.42857	-0.367347	-1.42857	-2.30612	-0.387755	-3.4898	6.12245	0255	three_four
29	017a5.jpg	headphones	curved	No_Shaded	hand	18.4	0	0	1	2	curved_sharp	-4.59184	-1.42857	-0.367347	-1.42857	-2.30612	-0.387755	-3.4898	6.12245	0175	frontal
29	012a6.jpg	door	curved	No_Shaded	hand	58	0	1	0	3	sharp_curved	-4.59184	-1.42857	-0.367347	-1.42857	-2.30612	-0.387755	-3.4898	6.12245	0126	frontal
29	002a5.jpg	umbrella	curved	No_Shaded	hand	18.2	0	0	1	2	sharp_curved	-4.59184	-1.42857	-0.367347	-1.42857	-2.30612	-0.387755	-3.4898	6.12245	0025	frontal
29	019s5.jpg	tap	sharp	Shaded	computer	51.4	0	1	0	3	sharp_curved	-4.59184	-1.42857	-0.367347	-1.42857	-2.30612	-0.387755	-3.4898	6.12245	0195	three_four
29	034a6.jpg	radio	curved	Shaded	hand	60.2	0	0	1	2	curved_sharp	-4.59184	-1.42857	-0.367347	-1.42857	-2.30612	-0.387755	-3.4898	6.12245	0346	frontal
29	016s6.jpg	watch	sharp	No_Shaded	hand	19	0	0	1	2	curved_sharp	-4.59184	-1.42857	-0.367347	-1.42857	-2.30612	-0.387755	-3.4898	6.12245	0166	frontal
29	049s4.jpg	lamp	sharp	No_Shaded	hand	18.6	0	1	0	3	sharp_curved	-4.59184	-1.42857	-0.367347	-1.42857	-2.30612	-0.387755	-3.4898	6.12245	0494	frontal
29	034a4.jpg	sponge	curved	Shaded	hand	47.8	0	0	1	2	sharp_curved	-4.59184	-1.42857	-0.367347	-1.42857	-2.30612	-0.387755	-3.4898	6.12245	0344	three_four
29	021s4.jpg	remote control	sharp	No_Shaded	computer	42.2	0	0	1	2	curved_sharp	-4.59184	-1.42857	-0.367347	-1.42857	-2.30612	-0.387755	-3.4898	6.12245	0214	three_four
29	022s3.jpg	mobile phone	sharp	Shaded	hand	19.4	1	0	0	1	curved_sharp	-4.59184	-1.42857	-0.367347	-1.42857	-2.30612	-0.387755	-3.4898	6.12245	0223	three_four
29	017s5.jpg	headphones	sharp	No_Shaded	hand	14.6	0	0	1	2	curved_sharp	-4.59184	-1.42857	-0.367347	-1.42857	-2.30612	-0.387755	-3.4898	6.12245	0175	frontal
29	027a2.jpg	electric guitar	curved	No_Shaded	computer	47.2	0	0	1	2	sharp_curved	-4.59184	-1.42857	-0.367347	-1.42857	-2.30612	-0.387755	-3.4898	6.12245	0272	frontal
29	021s3.jpg	toaster	sharp	No_Shaded	computer	20	0	1	0	3	curved_sharp	-4.59184	-1.42857	-0.367347	-1.42857	-2.30612	-0.387755	-3.4898	6.12245	0213	three_four
29	039a1.jpg	coffee maker	curved	Shaded	hand	18.2	0	1	0	3	sharp_curved	-4.59184	-1.42857	-0.367347	-1.42857	-2.30612	-0.387755	-3.4898	6.12245	0391	frontal
29	010s4.jpg	clock	sharp	No_Shaded	computer	21.2	1	0	0	1	sharp_curved	-4.59184	-1.42857	-0.367347	-1.42857	-2.30612	-0.387755	-3.4898	6.12245	0104	frontal
29	010a1.jpg	handbag	curved	No_Shaded	computer	20.2	1	0	0	1	sharp_curved	-4.59184	-1.42857	-0.367347	-1.42857	-2.30612	-0.387755	-3.4898	6.12245	0101	frontal
29	033a6.jpg	teapot	curved	No_Shaded	hand	45.2	1	0	0	1	sharp_curved	-4.59184	-1.42857	-0.367347	-1.42857	-2.30612	-0.387755	-3.4898	6.12245	0336	frontal
29	040a6.jpg	chair	curved	Shaded	hand	68.4	1	0	0	1	curved_sharp	-4.59184	-1.42857	-0.367347	-1.42857	-2.30612	-0.387755	-3.4898	6.12245	0406	three_four
29	002a3.jpg	lamp	curved	No_Shaded	hand	44.2	1	0	0	1	sharp_curved	-4.59184	-1.42857	-0.367347	-1.42857	-2.30612	-0.387755	-3.4898	6.12245	0023	three_four
29	050s5.jpg	tvmonitor	sharp	No_Shaded	computer	22	0	1	0	3	curved_sharp	-4.59184	-1.42857	-0.367347	-1.42857	-2.30612	-0.387755	-3.4898	6.12245	0505	frontal
29	034a1.jpg	jug	curved	Shaded	hand	59.2	0	0	1	2	sharp_curved	-4.59184	-1.42857	-0.367347	-1.42857	-2.30612	-0.387755	-3.4898	6.12245	0341	frontal
29	001a1.jpg	hat	curved	No_Shaded	computer	27	0	1	0	3	curved_sharp	-4.59184	-1.42857	-0.367347	-1.42857	-2.30612	-0.387755	-3.4898	6.12245	0011	three_four
29	040s6.jpg	chair	sharp	Shaded	hand	20.6	1	0	0	1	curved_sharp	-4.59184	-1.42857	-0.367347	-1.42857	-2.30612	-0.387755	-3.4898	6.12245	0406	three_four
29	010a4.jpg	clock	curved	No_Shaded	computer	34.6	1	0	0	1	sharp_curved	-4.59184	-1.42857	-0.367347	-1.42857	-2.30612	-0.387755	-3.4898	6.12245	0104	frontal
29	049a1.jpg	backpack	curved	No_Shaded	hand	69	0	0	1	2	sharp_curved	-4.59184	-1.42857	-0.367347	-1.42857	-2.30612	-0.387755	-3.4898	6.12245	0491	three_four
29	027s2.jpg	electric guitar	sharp	No_Shaded	computer	65.4	0	0	1	2	sharp_curved	-4.59184	-1.42857	-0.367347	-1.42857	-2.30612	-0.387755	-3.4898	6.12245	0272	frontal
29	039s1.jpg	coffee maker	sharp	Shaded	hand	28.6	0	1	0	3	sharp_curved	-4.59184	-1.42857	-0.367347	-1.42857	-2.30612	-0.387755	-3.4898	6.12245	0391	frontal
29	010a3.jpg	glasses	curved	No_Shaded	hand	60.4	0	0	1	2	sharp_curved	-4.59184	-1.42857	-0.367347	-1.42857	-2.30612	-0.387755	-3.4898	6.12245	0103	frontal
29	008s1.jpg	mirror	sharp	No_Shaded	computer	64.2	0	0	1	2	curved_sharp	-4.59184	-1.42857	-0.367347	-1.42857	-2.30612	-0.387755	-3.4898	6.12245	0081	three_four
29	022a3.jpg	mobile phone	curved	Shaded	hand	25	1	0	0	1	curved_sharp	-4.59184	-1.42857	-0.367347	-1.42857	-2.30612	-0.387755	-3.4898	6.12245	0223	three_four
29	040s7.jpg	pencil sharpener	sharp	Shaded	hand	48.2	0	1	0	3	curved_sharp	-4.59184	-1.42857	-0.367347	-1.42857	-2.30612	-0.387755	-3.4898	6.12245	0407	three_four
29	017a1.jpg	lighter	curved	Shaded	hand	47	1	0	0	1	sharp_curved	-4.59184	-1.42857	-0.367347	-1.42857	-2.30612	-0.387755	-3.4898	6.12245	0171	three_four
29	019a5.jpg	tap	curved	Shaded	computer	20	0	1	0	3	sharp_curved	-4.59184	-1.42857	-0.367347	-1.42857	-2.30612	-0.387755	-3.4898	6.12245	0195	three_four
29	040a5.jpg	watch	curved	Shaded	hand	63.4	0	0	1	2	curved_sharp	-4.59184	-1.42857	-0.367347	-1.42857	-2.30612	-0.387755	-3.4898	6.12245	0405	three_four
29	025s4.jpg	handle	sharp	No_Shaded	hand	65.4	0	0	1	2	sharp_curved	-4.59184	-1.42857	-0.367347	-1.42857	-2.30612	-0.387755	-3.4898	6.12245	0254	frontal
29	021a4.jpg	remote control	curved	No_Shaded	computer	19	0	0	1	2	curved_sharp	-4.59184	-1.42857	-0.367347	-1.42857	-2.30612	-0.387755	-3.4898	6.12245	0214	three_four
29	049s2.jpg	tv	sharp	No_Shaded	hand	47.4	0	1	0	3	curved_sharp	-4.59184	-1.42857	-0.367347	-1.42857	-2.30612	-0.387755	-3.4898	6.12245	0492	frontal
29	033a3.jpg	toaster	curved	No_Shaded	hand	34.8	0	1	0	3	sharp_curved	-4.59184	-1.42857	-0.367347	-1.42857	-2.30612	-0.387755	-3.4898	6.12245	0333	three_four
29	040s2.jpg	scissors	sharp	Shaded	hand	31	1	0	0	1	sharp_curved	-4.59184	-1.42857	-0.367347	-1.42857	-2.30612	-0.387755	-3.4898	6.12245	0402	three_four
29	025a6.jpg	comb	curved	No_Shaded	hand	49.8	1	0	0	1	curved_sharp	-4.59184	-1.42857	-0.367347	-1.42857	-2.30612	-0.387755	-3.4898	6.12245	0256	frontal
29	050s7.jpg	mobile phone	sharp	No_Shaded	computer	32.6	1	0	0	1	sharp_curved	-4.59184	-1.42857	-0.367347	-1.42857	-2.30612	-0.387755	-3.4898	6.12245	0507	frontal
29	010s7.jpg	remote control	sharp	No_Shaded	hand	40.2	1	0	0	1	sharp_curved	-4.59184	-1.42857	-0.367347	-1.42857	-2.30612	-0.387755	-3.4898	6.12245	0107	three_four
29	039s3.jpg	glass	sharp	Shaded	hand	73	1	0	0	1	curved_sharp	-4.59184	-1.42857	-0.367347	-1.42857	-2.30612	-0.387755	-3.4898	6.12245	0393	frontal
29	001a3.jpg	pen	curved	No_Shaded	computer	70.6	1	0	0	1	curved_sharp	-4.59184	-1.42857	-0.367347	-1.42857	-2.30612	-0.387755	-3.4898	6.12245	0013	three_four
29	002s3.jpg	lamp	sharp	No_Shaded	hand	67	1	0	0	1	sharp_curved	-4.59184	-1.42857	-0.367347	-1.42857	-2.30612	-0.387755	-3.4898	6.12245	0023	three_four
29	049a4.jpg	lamp	curved	No_Shaded	hand	26.6	0	1	0	3	sharp_curved	-4.59184	-1.42857	-0.367347	-1.42857	-2.30612	-0.387755	-3.4898	6.12245	0494	frontal
29	050s4.jpg	coffee maker	sharp	No_Shaded	computer	51.8	0	1	0	3	sharp_curved	-4.59184	-1.42857	-0.367347	-1.42857	-2.30612	-0.387755	-3.4898	6.12245	0504	frontal
29	019s4.jpg	duct tape	sharp	Shaded	computer	63.8	0	1	0	3	curved_sharp	-4.59184	-1.42857	-0.367347	-1.42857	-2.30612	-0.387755	-3.4898	6.12245	0194	three_four
29	025s6.jpg	comb	sharp	No_Shaded	hand	34.4	1	0	0	1	curved_sharp	-4.59184	-1.42857	-0.367347	-1.42857	-2.30612	-0.387755	-3.4898	6.12245	0256	frontal
29	014a5.jpg	cap	curved	No_Shaded	hand	19.2	0	0	1	2	sharp_curved	-4.59184	-1.42857	-0.367347	-1.42857	-2.30612	-0.387755	-3.4898	6.12245	0145	three_four
29	040a7.jpg	pencil sharpener	curved	Shaded	hand	68.2	0	1	0	3	curved_sharp	-4.59184	-1.42857	-0.367347	-1.42857	-2.30612	-0.387755	-3.4898	6.12245	0407	three_four
29	001s3.jpg	pen	sharp	No_Shaded	computer	45	1	0	0	1	curved_sharp	-4.59184	-1.42857	-0.367347	-1.42857	-2.30612	-0.387755	-3.4898	6.12245	0013	three_four
29	012s6.jpg	door	sharp	No_Shaded	hand	48.2	0	1	0	3	sharp_curved	-4.59184	-1.42857	-0.367347	-1.42857	-2.30612	-0.387755	-3.4898	6.12245	0126	frontal
29	010s1.jpg	handbag	sharp	No_Shaded	computer	24.2	1	0	0	1	sharp_curved	-4.59184	-1.42857	-0.367347	-1.42857	-2.30612	-0.387755	-3.4898	6.12245	0101	frontal
29	049a2.jpg	tv	curved	No_Shaded	hand	48.4	0	1	0	3	curved_sharp	-4.59184	-1.42857	-0.367347	-1.42857	-2.30612	-0.387755	-3.4898	6.12245	0492	frontal
29	034s3.jpg	handle	sharp	Shaded	hand	33.6	0	1	0	3	curved_sharp	-4.59184	-1.42857	-0.367347	-1.42857	-2.30612	-0.387755	-3.4898	6.12245	0343	frontal
3	050a5.jpg	tvmonitor	curved	No_Shaded	computer	22.4	0	1	0	3	sharp_curved	0.408163	0.571429	-1.36735	-0.428571	1.69388	-1.38776	-6.4898	-6.87755	0505	frontal
3	040s7.jpg	pencil sharpener	sharp	Shaded	hand	98	0	1	0	3	curved_sharp	0.408163	0.571429	-1.36735	-0.428571	1.69388	-1.38776	-6.4898	-6.87755	0407	three_four
3	025s6.jpg	comb	sharp	No_Shaded	hand	2	0	0	1	2	sharp_curved	0.408163	0.571429	-1.36735	-0.428571	1.69388	-1.38776	-6.4898	-6.87755	0256	frontal
3	034a3.jpg	handle	curved	Shaded	hand	47.4	0	0	1	2	sharp_curved	0.408163	0.571429	-1.36735	-0.428571	1.69388	-1.38776	-6.4898	-6.87755	0343	frontal
3	017s1.jpg	lighter	sharp	Shaded	hand	99.4	1	0	0	1	curved_sharp	0.408163	0.571429	-1.36735	-0.428571	1.69388	-1.38776	-6.4898	-6.87755	0171	three_four
3	010a7.jpg	remote control	curved	No_Shaded	hand	1	0	1	0	3	sharp_curved	0.408163	0.571429	-1.36735	-0.428571	1.69388	-1.38776	-6.4898	-6.87755	0107	three_four
3	040a7.jpg	pencil sharpener	curved	Shaded	hand	74.4	0	1	0	3	curved_sharp	0.408163	0.571429	-1.36735	-0.428571	1.69388	-1.38776	-6.4898	-6.87755	0407	three_four
3	049a1.jpg	backpack	curved	No_Shaded	hand	99.6	0	0	1	2	sharp_curved	0.408163	0.571429	-1.36735	-0.428571	1.69388	-1.38776	-6.4898	-6.87755	0491	three_four
3	022a3.jpg	mobile phone	curved	Shaded	hand	99.4	0	0	1	2	curved_sharp	0.408163	0.571429	-1.36735	-0.428571	1.69388	-1.38776	-6.4898	-6.87755	0223	three_four
3	040s6.jpg	chair	sharp	Shaded	hand	29.8	1	0	0	1	curved_sharp	0.408163	0.571429	-1.36735	-0.428571	1.69388	-1.38776	-6.4898	-6.87755	0406	three_four
3	014a5.jpg	cap	curved	No_Shaded	hand	100	1	0	0	1	sharp_curved	0.408163	0.571429	-1.36735	-0.428571	1.69388	-1.38776	-6.4898	-6.87755	0145	three_four
3	025s5.jpg	glasses	sharp	No_Shaded	hand	0.2	1	0	0	1	curved_sharp	0.408163	0.571429	-1.36735	-0.428571	1.69388	-1.38776	-6.4898	-6.87755	0255	three_four
3	010a3.jpg	glasses	curved	No_Shaded	hand	0.8	0	0	1	2	sharp_curved	0.408163	0.571429	-1.36735	-0.428571	1.69388	-1.38776	-6.4898	-6.87755	0103	frontal
3	016a4.jpg	lightbulb	curved	No_Shaded	hand	0.6	1	0	0	1	sharp_curved	0.408163	0.571429	-1.36735	-0.428571	1.69388	-1.38776	-6.4898	-6.87755	0164	frontal
3	010a4.jpg	clock	curved	No_Shaded	computer	99.6	1	0	0	1	sharp_curved	0.408163	0.571429	-1.36735	-0.428571	1.69388	-1.38776	-6.4898	-6.87755	0104	frontal
3	049a4.jpg	lamp	curved	No_Shaded	hand	100	1	0	0	1	curved_sharp	0.408163	0.571429	-1.36735	-0.428571	1.69388	-1.38776	-6.4898	-6.87755	0494	frontal
3	027s2.jpg	electric guitar	sharp	No_Shaded	computer	85.8	1	0	0	1	sharp_curved	0.408163	0.571429	-1.36735	-0.428571	1.69388	-1.38776	-6.4898	-6.87755	0272	frontal
3	033s3.jpg	toaster	sharp	No_Shaded	hand	1.2	0	0	1	2	curved_sharp	0.408163	0.571429	-1.36735	-0.428571	1.69388	-1.38776	-6.4898	-6.87755	0333	three_four
3	025s4.jpg	handle	sharp	No_Shaded	hand	0	0	0	1	2	sharp_curved	0.408163	0.571429	-1.36735	-0.428571	1.69388	-1.38776	-6.4898	-6.87755	0254	frontal
[truncated: 2,411 more rows]

## Sheet: Variables
Variable	Description
Subject_nr	Participant ID
Stimulus_file	name of the stimulus
Object	The object represented in the drawing
Contour	curved vs. sharp
Shading	shaded vs. non-shaded drawing
Category	hand-made vs. computer-made
Liking_Ratings	from 0 to 100
Curved_Familiarity	the curved object judged as the most familiar = 1
Sharp_Familiarity	the sharp-angled object judged as the most familiar = 1
Equally_Familiarity	both objects judged as equally familiar = 1
Familiarity_selection	1 = curved familiar, 2 = Equally familiar, 3 = sharp familiar
Familiarity_task_lateralization	curved - sharp vs. sharp - curved
art_interest_score.c	art interest score by participant centered on the grand mean
art_knowledge_score.c	art knowledge score by participant centered on the grand mean
openness_to_experience_score.c	openness to experience score by participant centered on the grand mean
unconventionality	unconventionality score by participant centered on the grand mean
HB_score.c	Holistic Big Picture type of intuition, scores centered on the grand mean
HA_score.c	Holistic Abstract type of intuition, scores centered on the grand mean
I_score.c	Inferential type of intuition, scores centered on the grand mean
A_score.c	Affective type of intuition, scores centered on the grand mean
Stimulus	Stimulus ID number
Position	frontal vs. three_four view
